# Supplementary material for: Exploring the chemical space of 1,2,3-triazolyl triclosan analogs for discovery of new antileishmanial chemotherapeutic agents
Source: Royal Society of Chemistry journal article supplement (doi:10.1039/d0md00291g), 2020-11-05

Supporting Information for

## Exploring the chemical space of 1,2,3-triazolyl triclosan analogs for discovery of new antileishmanial chemotherapeutic agents

Julia Fernández de Luco,<sup>a,‡</sup> Alejandro I. Recio-Balsells,<sup>a,‡</sup> Diego G. Ghiano,<sup>a,‡</sup> Ana Bortolotti,<sup>b</sup> Juan Manuel Belardinelli,<sup>b</sup> Nina Liu,<sup>c</sup> Pascal Hoffmann,<sup>d</sup> Christian Lherbet,<sup>d</sup> Peter J. Tonge,<sup>c</sup> Babu Tekwani,<sup>e,†</sup> Héctor R. Morbidoni,<sup>b,f,\*</sup> and Guillermo R. Labadie<sup>a,g,\*</sup>

<sup>a</sup>Instituto de Química Rosario, UNR, CONICET, Suipacha 531, S2002LRK, Rosario, ARGENTINA

<sup>b</sup>Laboratorio de Microbiología Molecular. Facultad de Ciencias Médicas, Universidad Nacional de Rosario, Santa Fe 3100, S2002KTR, Rosario, ARGENTINA

<sup>c</sup>Institute of Chemical Biology & Drug Discovery, Department of Chemistry, Stony Brook University, Stony Brook, NY 11794, USA

<sup>d</sup>LSPCMIB, UMR-CNRS 5068, Université Paul Sabatier-Toulouse III, 118 Route de Narbonne, 31062 Toulouse Cedex 9, France

<sup>e</sup>National Center for Natural Products Research & Department of Biomolecular Sciences, School of Pharmacy, University of Mississippi, MS 38677, USA

<sup>f</sup>Consejo de Investigaciones, Universidad Nacional de Rosario

<sup>g</sup>Departamento de Química Orgánica, Facultad de Ciencias Bioquímicas y Farmacéuticas, Universidad Nacional de Rosario, Suipacha 531, S2002LRK, Rosario, ARGENTINA

<sup>†</sup>Present address: Department of Infectious Diseases, Division of Drug Discovery, Southern Research, Birmingham, AL 35205, USA

<sup>‡</sup>These authors contributed equally to this work.

List of Supporting Information

|                                                                                   |    |
|-----------------------------------------------------------------------------------|----|
| <b>Material and Methods</b> .....                                                 | 3  |
| <b>General Information</b> .....                                                  | 3  |
| Synthesis of 2-(prop-2-yn-1-yloxy) phenol (3). ....                               | 3  |
| Synthesis 1-methoxy-2-(prop-2-yn-1-yloxy)benzene (4). ....                        | 3  |
| Synthesis of 2-(azidomethyl)phenol (8). ....                                      | 4  |
| General procedure for the synthesis of 1,4-disubstituted 1,2,3-triazoles.....     | 4  |
| Synthesis of compounds 5a to 9e. ....                                             | 4  |
| General procedure for synthesis of 1,2,3-triazoles by thermic cycloaddition. .... | 13 |
| Synthesis of compounds 11a to 15f. ....                                           | 13 |
| References:.....                                                                  | 21 |
| <b>Figures and Tables</b> . ....                                                  | 22 |
| SMILES of compounds. ....                                                         | 22 |
| Physicochemical parameters of active compounds.....                               | 25 |
| <b>Spectral Data of compounds</b> . ....                                          | 26 |

## Material and Methods.

### General Information.

All reactions progress was monitored on GP TLC plates. Column chromatography was performed with silica gel 60 (230-400 mesh) under a low pressure of nitrogen, using increasing EtOAc-hexane gradients as a solvent. All the solvents (hexane, ethyl acetate) were distilled before use. Chemical reagents were purchased from commercial suppliers and used without further purification, unless otherwise noted. Solvents were analytical grade or were purified by standard procedures prior to use.  $^1\text{H}$  and  $^{13}\text{C}$  NMR spectra were measured on a 300 MHz Bruker Avance II using  $\text{CDCl}_3$  as a solvent. Chemical shifts were reported in ppm downfield from tetramethylsilane ( $\delta$ ) as the internal standards and coupling constants are in hertz (Hz). Assignments of proton resonances were confirmed by correlated spectroscopy (Heteronuclear Single Quantum Coherence, HSQC). The following abbreviations are used to indicate NMR signal multiplicities: s = singlet, d = doublet, t = triplet, q = quartet, p = pentet, m = multiplet. High-resolution mass spectra (HRMS) were recorded on a Bruker MicroTOF II spray source. All the melting points were determined in open Pyrex capillaries with an Electrothermal 9000 melting point apparatus.

### Synthesis of 2-(prop-2-yn-1-yloxy) phenol (3).

Catechol (1000 mg, 9.1 mmol) were dissolved in ethanol (10 ml). Afterwards potassium carbonate (1100 mg, 7.96 mmol) were added and the reaction were stirred for 30 minutes. Then the propargyl bromide (812 mg, 6.83 mmol) were added dropwise and the reaction were stirred at reflux overnight. The solvents were dried under vacuum and the residue was dissolved in dichloromethane. Brine was added and the solution was extracted with dichloromethane. Combined organic extracts were dried with sodium sulphate and evaporated. The resulting residue was purified by column chromatography over silica gel using an increasing AcOEt/hexane gradient to afford 624 mg of a white solid. (Isolated Yield: 46%). Spectral data of the product were coincident with previously reported by *Hamasaka et al.*<sup>1</sup>

### Synthesis 1-methoxy-2-(prop-2-yn-1-yloxy)benzene (4).

2-Methoxyphenol (1000 mg, 8.1 mmol) were dissolved in ethanol (10 ml). Afterwards potassium carbonate (1448 mg, 10.5 mmol) were added and the reaction were stirred for 30 minutes. Then the propargyl bromide (1054 mg, 8.86 mmol) were added dropwise and the reaction were stirred at reflux overnight. The solvent were dried under vacuum and the residue was dissolved in dichloromethane. Brine was added and the solution was extracted with

dichloromethane. Combined organic extracts were dried with sodium sulphate and evaporated. The resulting residue was purified by column chromatography over silica gel using an increasing AcOEt/hexane gradient to afford 520 mg of a yellow oil. (Isolated Yield: 40%). Spectral data of the product were coincident with previously reported by *Irfan et al.*<sup>2</sup>

### Synthesis of 2-(azidomethyl)phenol (**8**).

The procedure followed for the synthesis of 2-(azidomethyl)phenol intermediate were the reported by *Zhang et al.*<sup>3</sup> Spectral data of the product were coincident with the reported.

### General procedure for the synthesis of 1,4-disubstituted 1,2,3-triazoles.

The respected alkyne (1 eq) and azide (1.5 eq) substract were suspended in 4 mL of <sup>t</sup>BuOH:H<sub>2</sub>O (1:1). Afterwards, aqueous 1 M CuSO<sub>4</sub> (0.025 eq) solution and aqueous 1 M sodium ascorbate (0.1 eq) solution were added. The mixture was stirred overnight at room temperature. Brine was added and the solution was extracted with dichloromethane. Combined organic extracts were dried with sodium sulphate and evaporated. The resulting residue was purified by column chromatography over silica gel using an increasing AcOEt/hexane gradient to afford desired pure products.

### Synthesis of compounds 5a to 9e.

#### Synthesis of 2-((1-benzyl-1H-1,2,3-triazol-4-yl)methoxy)phenol (**5a**).

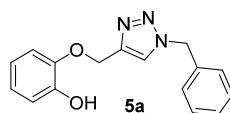

The 2-(prop-2-yn-1-yloxy) phenol (**3**) (40 mg; 0.27 mmol) and benzyl azide (60.0 mg; 0.40 mmol) was dissolved in 4 ml of H<sub>2</sub>O:<sup>t</sup>BuOH. Following the general procedure for the synthesis of 1,4-disubstituted-1,2,3-triazoles, the reaction was work up and purified to afford 57.7 mg of a colorless oil. (Isolated yield: 76%). <sup>1</sup>H NMR (300 MHz, CDCl<sub>3</sub>) δ: 7.48 (s, 1H); 7.39 (d, *J* = 1.7 Hz, 1H); 7.37 (d, *J* = 2.1 Hz, 2H); 7.26 (m, 2H); 6.99 (dd, *J*<sub>1</sub> = 7.4 Hz, *J*<sub>2</sub> = 1.4 Hz, 1H); 6.92 (dd, *J*<sub>1</sub> = 7.7 Hz, *J*<sub>2</sub> = 2.2 Hz, 1H); 6.88 (dd, *J*<sub>1</sub> = 7.8 Hz, *J*<sub>2</sub> = 1.4 Hz, 1H); 6.82 (ddd, *J*<sub>1</sub> = 7.4 Hz, *J*<sub>2</sub> = 1.4 Hz, *J*<sub>3</sub> = 1.4 Hz, 1H); 6.06 (s, 1H); 5.54 (s, 2H); 5.22 (s, 2H). <sup>13</sup>C NMR (75 MHz, CDCl<sub>3</sub>) δ : 146.5 (C); 145.6 (C); 144.0 (C); 134.3 (C); 129.2 (CH); 128.9 (CH); 128.1 (CH); 122.7 (CH); 122.6 (CH); 120.1 (CH); 115.6 (CH); 113.7 (CH); 63.2 (CH<sub>2</sub>); 54.3 (CH<sub>2</sub>). **ESI-HRMS Calcd for (M+Na<sup>+</sup>)** C<sub>16</sub>H<sub>15</sub>N<sub>3</sub>O<sub>2</sub>Na 304.1056; found 304.1051.

#### Synthesis of 2-((1-(3-phenylpropyl)-1H-1,2,3-triazol-4-yl)methoxy)phenol (**5b**).

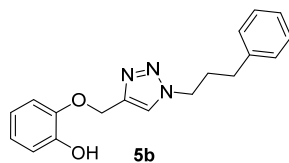

The 2-(prop-2-yn-1-yloxy) phenol (**3**) (40 mg; 0.27 mmol) and (3-azidopropyl)benzene (65.0 mg; 0.40 mmol) was dissolved in 4 ml of H<sub>2</sub>O:<sup>t</sup>BuOH. Following the general procedure for the synthesis of 1,4-disubstituted-1,2,3-triazoles, the reaction was work up and purified to afford 67.7 mg of a colorless oil. (Isolated yield: 81%). <sup>1</sup>H NMR (300 MHz, CDCl<sub>3</sub>) δ: 7.50 (s, 1H); 7.30 (m, 1H); 7.23 (m, 2H); 7.15 (d, *J* = 6.8 Hz, 2H); 7.02 (dd, *J*<sub>1</sub> = 7.3 Hz, *J*<sub>2</sub> = 1.7 Hz, 1H); 6.92 (dd, *J*<sub>1</sub> = 8.0 Hz, *J*<sub>2</sub> = 2.4 Hz, 1H); 6.88 (dd, *J*<sub>1</sub> = 8.0 Hz, *J*<sub>2</sub> = 1.7 Hz, 1H); 6.82 (ddd, *J*<sub>1</sub> = 7.1 Hz, *J*<sub>2</sub> = 2.5 Hz, *J*<sub>3</sub> = 2.3 Hz, 1H); 6.13 (s, 1H); 5.26 (s, 2H); 4.35 (t, *J* = 7.6 Hz, 2H); 2.65 (t, *J* = 7.6 Hz, 2H); 2.26 (q, *J* = 7.6 Hz, 2H). <sup>13</sup>C NMR (75 MHz, CDCl<sub>3</sub>) δ : 146.7 (C); 145.7 (C); 143.6 (C); 140.0 (C); 128.6 (CH); 128.4 (CH); 126.4 (CH); 122.8 (CH); 122.6 (CH); 120.1 (CH); 115.7 (CH); 113.8 (CH); 63.2 (CH<sub>2</sub>); 49.6 (CH<sub>2</sub>); 32.4 (CH<sub>2</sub>); 31.5 (CH<sub>2</sub>). ESI-HRMS Calcd for (M+Na<sup>+</sup>) C<sub>18</sub>H<sub>19</sub>N<sub>3</sub>NaO<sub>2</sub> 332.1359; found 332.1387.

**Synthesis of 2-((1-cinnamyl-1H-1,2,3-triazol-4-yl)methoxy)phenol (5c).**

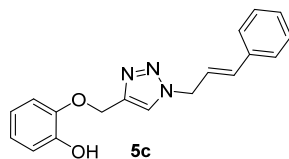

The 2-(prop-2-yn-1-yloxy) phenol (**3**) (40 mg; 0.27 mmol) and cinnamyl azide (64.0 mg; 0.40 mmol) was dissolved in 4 ml of H<sub>2</sub>O:<sup>t</sup>BuOH. Following the general procedure for the synthesis of 1,4-disubstituted-1,2,3-triazoles, the reaction was work up and purified to afford 58.9 mg of a colorless oil. (Isolated yield: 71%). <sup>1</sup>H NMR (300 MHz, CDCl<sub>3</sub>) δ: 7.63 (s, 1H); 7.41-7.26 (m, 5H); 7.02 (dd, *J*<sub>1</sub> = 7.6 Hz, *J*<sub>2</sub> = 1.3 Hz, 1H); 6.96 (dd, *J*<sub>1</sub> = 7.8 Hz, *J*<sub>2</sub> = 2.2 Hz, 1H); 6.91 (dd, *J*<sub>1</sub> = 7.8 Hz, *J*<sub>2</sub> = 1.3 Hz, 1H); 6.84 (ddd, *J*<sub>1</sub> = 6.9 Hz, *J*<sub>2</sub> = 2.4 Hz, *J*<sub>3</sub> = 2.2 Hz, 1H); 6.67 (d, *J* = 15.7 Hz, 1H); 6.34 (dt, *J*<sub>1</sub> = 15.7 Hz, *J*<sub>2</sub> = 6.6 Hz, 1H); 6.12 (s, 1H); 5.26 (s, 1H); 5.14 (dd, *J*<sub>1</sub> = 6.7 Hz, *J*<sub>2</sub> = 1.3 Hz, 2H). <sup>13</sup>C NMR (75 MHz, CDCl<sub>3</sub>) δ : 146.6 (C); 145.7 (C); 143.9 (C); 135.6 (CH); 135.4 (C); 128.8 (CH); 126.8 (CH); 122.6 (CH); 122.5 (CH); 121.6 (CH); 120.1 (CH); 115.6 (CH); 113.7 (CH); 63.2 (CH<sub>2</sub>); 52.5 (CH<sub>2</sub>). ESI-HRMS Calcd for (M+Na<sup>+</sup>) C<sub>18</sub>H<sub>17</sub>N<sub>3</sub>NaO<sub>2</sub> 330.1213; found 330.1223.

**Synthesis of 2-((1-cyclohexyl-1H-1,2,3-triazol-4-yl)methoxy)phenol (5d).**

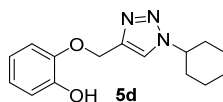

The 2-(prop-2-yn-1-yloxy) phenol (**3**) (50 mg; 0.34 mmol) and cyclohexyl azide (63.0 mg; 0.51 mmol) was dissolved in 4 ml of H<sub>2</sub>O:<sup>t</sup>BuOH. Following the general procedure for the synthesis of 1,4-disubstituted-1,2,3-triazoles, the reaction was work up and purified to afford 62.7 mg of a colorless oil. (Isolated yield: 68%). <sup>1</sup>H NMR (300 MHz, CDCl<sub>3</sub>) δ: 7.57 (s, 1H); 7.00 (dd, *J*<sub>1</sub> = 7.6 Hz, *J*<sub>2</sub> = 1.4 Hz, 1H); 6.94 (dd, *J*<sub>1</sub> = 7.8 Hz, *J*<sub>2</sub> = 2.3 Hz, 1H); 6.89 (dd, *J*<sub>1</sub> = 7.8 Hz, *J*<sub>2</sub> = 1.4 Hz, 1H); 6.82 (ddd, *J*<sub>1</sub> = 7.1 Hz, *J*<sub>2</sub> = 2.3 Hz, *J*<sub>3</sub> = 2.2 Hz, 1H); 6.20 (s, 1H); 5.24 (s, 2H); 4.45 (tt, *J*<sub>1</sub> = 11.4 Hz, *J*<sub>2</sub> = 3.9 Hz, 1H); 2.22 (dd, *J*<sub>1</sub> = 12.7 Hz, *J*<sub>2</sub> = 2.3 Hz, 2H); 1.93 (dt, *J*<sub>1</sub> = 13.7 Hz, *J*<sub>2</sub> = 3.6 Hz, 2H); 1.74 (dd, *J*<sub>1</sub> = 12.4 Hz, *J*<sub>2</sub> = 3.0 Hz, 2H); 1.70 (dd, *J*<sub>1</sub> = 12.7 Hz, *J*<sub>2</sub> = 3.7 Hz, 2H); 1.46 (qt, *J*<sub>1</sub> = 13.0 Hz, *J*<sub>2</sub> = 3.2 Hz, 1H); 1.28 (qt, *J*<sub>1</sub> = 12.5 Hz, *J*<sub>2</sub> = 3.2 Hz, 1H). <sup>13</sup>C NMR (75 MHz, CDCl<sub>3</sub>) δ : 146.6 (C); 145.8 (C); 143.1 (C); 122.5 (CH); 120.6 (CH); 120.1 (CH); 115.6 (CH); 113.8 (CH); 63.3 (CH<sub>2</sub>); 60.3 (CH); 33.4 (CH<sub>2</sub>); 25.1 (CH<sub>2</sub>); 25.0 (CH<sub>2</sub>).

**Synthesis of 2-((1-octyl-1H-1,2,3-triazol-4-yl)methoxy)phenol (5e)**

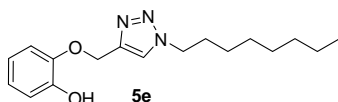

The 2-(prop-2-yn-1-yloxy) phenol (**3**) (42 mg; 0.28 mmol) and octil azide (66.0 mg; 0.43 mmol) was dissolved in 4 ml of H<sub>2</sub>O:<sup>t</sup>BuOH. Following the general procedure for the synthesis of 1,4-disubstituted-1,2,3-triazoles, the reaction was work up and purified to afford 58.5 mg of a colorless oil. (Isolated yield: 65%). <sup>1</sup>H NMR (300 MHz, CDCl<sub>3</sub>) δ: 7.54 (s, 1H); 7.01 (dd, *J*<sub>1</sub> = 7.7 Hz, *J*<sub>2</sub> = 1.4 Hz, 1H); 6.95 (dd, *J*<sub>1</sub> = 7.9 Hz, *J*<sub>2</sub> = 2.3 Hz, 1H); 6.91 (dd, *J*<sub>1</sub> = 7.9 Hz, *J*<sub>2</sub> = 1.4 Hz, 1H); 6.83 (ddd, *J*<sub>1</sub> = 7.9 Hz, *J*<sub>2</sub> = 2.8 Hz, *J*<sub>3</sub> = 2.3 Hz, 1H); 6.10 (s, 1H); 5.27 (s, 2H); 4.35 (t, *J* = 7.2 Hz, 2H); 1.91 (q, *J* = 7.1 Hz, 2H); 1.37-1.22 (m, 10H); 0.88 (t, *J* = 7.1 Hz, 3H). <sup>13</sup>C NMR (75 MHz, CDCl<sub>3</sub>) δ : 146.6 (C); 145.6 (C); 143.5 (C); 122.5 (CH); 120.1 (CH); 115.5 (CH); 113.7 (CH); 63.3 (CH<sub>2</sub>); 50.5 (CH<sub>2</sub>); 31.7 (CH<sub>2</sub>); 30.2 (CH<sub>2</sub>); 29.0 (CH<sub>2</sub>); 28.9 (CH<sub>2</sub>); 26.4 (CH<sub>2</sub>); 22.6 (CH<sub>2</sub>); 14.0 (CH<sub>3</sub>).

**Synthesis of 2-((1-tridecyl-1H-1,2,3-triazol-4-yl)methoxy)phenol (5f).**

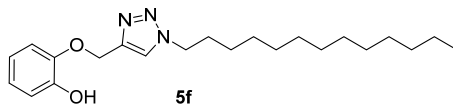

The 2-(prop-2-yn-1-yloxy) phenol (**3**) (35 mg; 0.24 mmol) and tridecanyl azide (80.0 mg; 0.35 mmol) was dissolved in 4 ml of H<sub>2</sub>O:<sup>t</sup>BuOH. Following the general procedure for the synthesis of 1,4-disubstituted-1,2,3-triazoles, the reaction was work up and purified to afford 72.4 mg of a colorless oil. (Isolated yield: 82%). <sup>1</sup>H NMR (300 MHz, CDCl<sub>3</sub>) δ: 7.54 (s, 1H); 7.00 (dd, *J*<sub>1</sub> = 7.8 Hz, *J*<sub>2</sub> = 1.5 Hz, 1H); 6.94 (dd, *J*<sub>1</sub> = 7.8 Hz, *J*<sub>2</sub> = 2.1 Hz, 1H); 6.90 (dd, *J*<sub>1</sub> = 7.9 Hz, *J*<sub>2</sub> = 1.5 Hz, 1H); 6.82 (ddd,

$J_1 = 7.8$  Hz,  $J_2 = 2.5$  Hz,  $J_3 = 2.3$  Hz, 1H); 6.11 (s, 1H); 5.26 (s, 2H); 4.35 (t,  $J = 7.9$  Hz, 2H); 1.09 (q,  $J = 7.6$  Hz, 2H); 1.35-1.22 (m, 20H); 0.88 (t,  $J = 6.7$  Hz, 3H).  $^{13}\text{C NMR}$  (75 MHz,  $\text{CDCl}_3$ )  $\delta$ : 146.6 (C); 145.7 (C); 143.5 (C); 122.6 (CH); 122.5 (CH); 120.1 (CH); 115.6 (CH); 113.8 (CH); 63.2 ( $\text{CH}_2$ ); 50.5 ( $\text{CH}_2$ ); 31.9 ( $\text{CH}_2$ ); 30.2 ( $\text{CH}_2$ ); 29.6 ( $\text{CH}_2$ ); 29.5 ( $\text{CH}_2$ ); 29.4 ( $\text{CH}_2$ ); 29.3 ( $\text{CH}_2$ ); 29.0 ( $\text{CH}_2$ ); 26.4 ( $\text{CH}_2$ ); 22.7 ( $\text{CH}_2$ ); 14.1 ( $\text{CH}_3$ ).

**Synthesis of (Z)-2-((1-(3,7-dimethylocta-2,6-dien-1-yl)-1H-1,2,3-triazol-4-yl)methoxy)phenol (5gZ) and (E)-2-((1-(3,7-dimethylocta-2,6-dien-1-yl)-1H-1,2,3-triazol-4-yl)methoxy)phenol (5gE).**

The 2-(prop-2-yn-1-yloxy) phenol (**3**) (40 mg; 0.27 mmol) and geranyl azide (73.0 mg; 0.40 mmol) was dissolved in 4 ml of  $\text{H}_2\text{O}:\text{tBuOH}$ . Following the general procedure for the synthesis of 1,4-disubstituted-1,2,3-triazoles, the reaction was work up and purified to afford 61.8 mg of the two isomers. (Isolated yield: 70%).

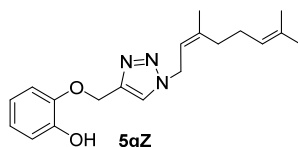

**(Z)-2-((1-(3,7-dimethylocta-2,6-dien-1-yl)-1H-1,2,3-triazol-4-yl)methoxy)phenol (5gZ).** Colorless oil.  $^1\text{H NMR}$  (300 MHz,  $\text{CDCl}_3$ )  $\delta$ : 7.54 (s, 1H); 7.02 (dd,  $J_1 = 7.7$  Hz,  $J_2 = 1.5$  Hz, 1H); 6.94 (dd,  $J_1 = 7.9$  Hz,  $J_2 = 2.4$  Hz, 1H); 6.90 (dd,  $J_1 = 7.8$  Hz,  $J_2 = 1.5$  Hz, 1H); 6.83 (ddd,  $J_1 = 7.0$  Hz,  $J_2 = 2.4$  Hz,  $J_3 = 2.1$  Hz, 1H); 6.14 (s, 1H); 5.43 (tt,  $J_1 = 7.2$  Hz,  $J_2 = 0.7$  Hz, 1H); 5.23 (s, 2H); 5.08 (tq,  $J_1 = 7.0$  Hz,  $J_2 = 1.5$  Hz, 1H); 4.96 (dd,  $J_1 = 7.3$  Hz,  $J_2 = 0.8$  Hz, 2H); 2.24-2.07 (m, 4H); 1.81 (s, 3H); 1.68 (s, 3H); 1.60 (s, 3H).  $^{13}\text{C NMR}$  (75 MHz,  $\text{CDCl}_3$ )  $\delta$ : 146.6 (C); 145.7 (C); 143.5 (C); 143.4 (C); 132.7 (C); 123.1 (CH); 122.5 (CH); 122.0 (CH); 120.1 (CH); 117.5 (CH); 115.5 (CH); 113.6 (CH); 63.3 ( $\text{CH}_2$ ); 47.9 ( $\text{CH}_2$ ); 32.1 ( $\text{CH}_2$ ); 26.2 ( $\text{CH}_2$ ); 25.7 ( $\text{CH}_3$ ); 23.4 ( $\text{CH}_3$ ); 17.7 ( $\text{CH}_3$ ). **ESI-HRMS Calcd for ( $\text{M}+\text{Na}^+$ )**  $\text{C}_{19}\text{H}_{25}\text{N}_3\text{NaO}_2$  350.1839; found 350.1845.

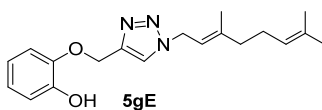

**(E)-2-((1-(3,7-dimethylocta-2,6-dien-1-yl)-1H-1,2,3-triazol-4-yl)methoxy)phenol (5gE).** Colorless oil.  $^1\text{H NMR}$  (300 MHz,  $\text{CDCl}_3$ )  $\delta$ : 7.52 (s, 1H); 7.01 (dd,  $J_1 = 7.6$  Hz,  $J_2 = 1.2$  Hz, 1H); 6.94 (dd,  $J_1 = 8.1$  Hz,  $J_2 = 2.3$  Hz, 1H); 6.89 (dd,  $J_1 = 7.6$  Hz,  $J_2 = 1.4$  Hz, 1H); 6.82 (ddd,  $J_1 = 6.6$  Hz,  $J_2 = 2.5$  Hz,  $J_3 = 2.3$  Hz, 1H); 6.10 (s, 1H); 5.43 (td,  $J_1 = 7.5$  Hz,  $J_2 = 1.2$  Hz, 1H); 5.23 (s, 2H); 5.05 (tq,  $J_1 = 6.5$  Hz,  $J_2 = 1.4$  Hz, 1H); 4.98 (d,  $J = 7.4$  Hz, 2H); 2.11 (s, 4H); 1.78 (s, 3H); 1.67 (s, 3H); 1.59 (s, 3H).  $^{13}\text{C NMR}$  (75 MHz,  $\text{CDCl}_3$ )  $\delta$ : 146.6 (C); 145.7 (C); 143.6 (C); 143.5 (C); 132.1 (C); 123.4 (CH); 122.5 (CH); 122.0

(CH); 120.1 (CH); 116.7 (CH); 115.6 (CH); 113.7 (CH); 63.2 (CH<sub>2</sub>); 48.0 (CH<sub>2</sub>); 39.4 (CH<sub>2</sub>); 26.1 (CH<sub>2</sub>); 25.7 (CH<sub>3</sub>); 17.7 (CH<sub>3</sub>); 16.4 (CH<sub>3</sub>). **ESI-HRMS Calcd for (M+Na<sup>+</sup>)** C<sub>19</sub>H<sub>25</sub>N<sub>3</sub>NaO<sub>2</sub> 350.1839; found 350.1845.

**Synthesis of ethyl 2-(4-((2-hydroxyphenoxy)methyl)-1H-1,2,3-triazol-1-yl)acetate (5h).**

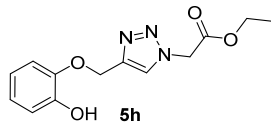

The 2-(prop-2-yn-1-yloxy) phenol (**3**) (45 mg; 0.30 mmol) and ethyl 2-azidoacetate (59.0 mg; 0.46 mmol) was dissolved in 4 ml of H<sub>2</sub>O:<sup>t</sup>BuOH. Following the general procedure for the synthesis of 1,4-disubstituted-1,2,3-triazoles, the reaction was work up and purified to afford 66.5 mg of a colorless oil. (Isolated yield: 79%). **<sup>1</sup>H NMR (300 MHz, CDCl<sub>3</sub>)** δ: 7.73 (s, 1H); 7.02 (dd, *J*<sub>1</sub> = 7.5 Hz, *J*<sub>2</sub> = 1.5 Hz, 1H); 6.93 (dd, *J*<sub>1</sub> = 7.5 Hz, *J*<sub>2</sub> = 2.1 Hz, 1H); 6.92 (dd, *J*<sub>1</sub> = 7.8 Hz, *J*<sub>2</sub> = 1.4 Hz, 1H); 6.84 (ddd, *J*<sub>1</sub> = 6.9 Hz, *J*<sub>2</sub> = 2.6 Hz, *J*<sub>3</sub> = 2.4 Hz, 1H); 6.00 (s, 1H); 5.29 (s, 2H); 5.18 (s, 2H); 4.28 (q, *J* = 7.1 Hz, 2H); 1.31 (t, *J* = 7.3 Hz, 3H). **<sup>13</sup>C NMR (75 MHz, CDCl<sub>3</sub>)** δ : 166.3 (C); 146.5 (C); 145.5 (C); 143.9 (C); 124.5 (CH); 122.4 (CH); 120.1 (CH); 115.6 (CH); 113.6 (CH); 62.9 (CH<sub>2</sub>); 62.5 (CH<sub>2</sub>); 50.8 (CH<sub>2</sub>); 14.0 (CH<sub>3</sub>).

**Synthesis of ethyl 5-(4-((2-hydroxyphenoxy)methyl)-1H-1,2,3-triazol-1-yl)pentanoate (5i).**

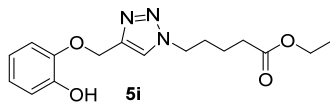

The 2-(prop-2-yn-1-yloxy) phenol (**3**) (40 mg; 0.27 mmol) and ethyl 5-azidopentanoate (95.0 mg; 0.54 mmol) was dissolved in 4 ml of H<sub>2</sub>O:<sup>t</sup>BuOH. Following the general procedure for the synthesis of 1,4-disubstituted-1,2,3-triazoles, the reaction was work up and purified to afford 67.3 mg of a colorless oil. (Isolated yield: 78%). **<sup>1</sup>H NMR (300 MHz, CDCl<sub>3</sub>)** δ: 7.58 (s, 1H); 6.98 (dd, *J*<sub>1</sub> = 7.6 Hz, *J*<sub>2</sub> = 1.3 Hz, 1H); 6.91 (dd, *J*<sub>1</sub> = 7.8 Hz, *J*<sub>2</sub> = 1.9 Hz, 1H); 6.87 (dd, *J*<sub>1</sub> = 7.8 Hz, *J*<sub>2</sub> = 1.3 Hz, 1H); 6.80 (ddd, *J*<sub>1</sub> = 7.9 Hz, *J*<sub>2</sub> = 2.5 Hz, *J*<sub>3</sub> = 2.0 Hz, 1H); 6.10 (s, 1H); 5.26 (s, 2H); 4.39 (t, *J* = 7.1 Hz, 2H); 4.13 (q, *J* = 7.1 Hz, 2H); 2.34 (t, *J* = 7.0 Hz, 2H); 1.97 (q, *J* = 8.1 Hz, 2H); 1.65 (s, *J* = 8.1 Hz, 2H); 1.25 (t; *J* = 6.8 Hz, 3H). **<sup>13</sup>C NMR (75 MHz, CDCl<sub>3</sub>)** δ : 173.0 (C); 146.6 (C); 145.7 (C); 143.6 (C); 122.8 (CH); 122.5 (CH); 120.1 (CH); 115.6 (CH); 113.8 (CH); 63.2 (CH<sub>2</sub>); 60.5 (CH<sub>2</sub>); 50.0 (CH<sub>2</sub>); 33.3 (CH<sub>2</sub>); 29.4 (CH<sub>2</sub>); 21.7 (CH<sub>2</sub>); 14.2 (CH<sub>3</sub>). **ESI-HRMS Calcd for (M+Na<sup>+</sup>)** C<sub>16</sub>H<sub>21</sub>N<sub>3</sub>NaO<sub>4</sub> 342.1424; found 342.1420.

**Synthesis of 1-benzyl-4-((2-methoxyphenoxy)methyl)-1H-1,2,3-triazole (6a).**



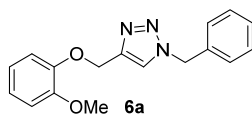

The 1-methoxy-2-(prop-2-yn-1-yloxy)benzene (**4**) (48 mg; 0.30 mmol) and benzyl azide (72.0 mg; 0.44 mmol) was dissolved in 4 ml of H<sub>2</sub>O:<sup>t</sup>BuOH. Following the general procedure for the synthesis of 1,4-disubstituted-1,2,3-triazoles, the reaction was work up and purified to afford 61.1 mg of a colorless oil. (Isolated yield: 70%). <sup>1</sup>H NMR (300 MHz, CDCl<sub>3</sub>) δ: 7.55 (s, 1H); 7.37 (d, *J* = 1.9 Hz, 1H); 7.35 (d, *J* = 2.1 Hz, 2H); 7.25 (dd, *J*<sub>1</sub> = 7.6 Hz, *J*<sub>2</sub> = 2.4 Hz, 2H); 7.04 (dd, *J*<sub>1</sub> = 8.4 Hz, *J*<sub>2</sub> = 2.0 Hz, 1H); 6.94 (ddd, *J*<sub>1</sub> = 8.1 Hz, *J*<sub>2</sub> = 1.9 Hz, 1H); 6.89 (dd, *J*<sub>1</sub> = 2.0 Hz, *J*<sub>2</sub> = 1.4 Hz, 1H); 6.88 (ddd, *J*<sub>1</sub> = 4.6 Hz, *J*<sub>2</sub> = 2.1 Hz, *J*<sub>3</sub> = 1.9 Hz, 1H); 5.51 (s, 2H); 5.27 (s, 2H); 3.83 (s, 3H). <sup>13</sup>C NMR (75 MHz, CDCl<sub>3</sub>) δ: 149.7 (C); 147.6 (C); 144.7 (C); 134.5 (C); 129.1 (CH); 128.7 (CH); 128.1 (CH); 122.9 (CH); 121.9 (CH); 120.9 (CH); 114.6 (CH); 111.8 (CH); 63.3 (CH<sub>2</sub>); 55.8 (CH<sub>3</sub>); 54.1 (CH<sub>2</sub>).

**Synthesis of 4-((2-methoxyphenoxy)methyl)-1-(3-phenylpropyl)-1H-1,2,3-triazole (6b).**

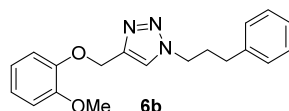

The 1-methoxy-2-(prop-2-yn-1-yloxy)benzene (**4**) (50 mg; 0.31 mmol) and (3-azidopropyl)benzene (75.0 mg; 0.46 mmol) was dissolved in 4 ml of H<sub>2</sub>O:<sup>t</sup>BuOH. Following the general procedure for the synthesis of 1,4-disubstituted-1,2,3-triazoles, the reaction was work up and purified to afford 81.7 mg of a colorless oil. (Isolated yield: 82%). <sup>1</sup>H NMR (300 MHz, CDCl<sub>3</sub>) δ: δ = 7.59 (s, 1H); 7.28 (m, 2H); 7.20 (m, 1H); 7.15 (d, *J* = 7.1 Hz, 2H); 7.05 (dd, *J*<sub>1</sub> = 7.9 Hz, *J*<sub>2</sub> = 1.9 Hz, 1H); 6.93 (m, 1H); 6.91 (s, 1H); 6.90 (ddd, *J*<sub>1</sub> = 6.4 Hz, *J*<sub>2</sub> = 2.4 Hz, *J*<sub>3</sub> = 2.3 Hz, 1H); 5.31 (s, 2H); 4.33 (t, *J* = 7.3 Hz, 2H); 3.87 (s, 3H); 2.64 (t, *J* = 7.5 Hz, 2H); 2.25 (q, *J* = 7.5 Hz, 2H). <sup>13</sup>C NMR (75 MHz, CDCl<sub>3</sub>) δ: 149.6 (C); 147.6 (C); 144.3 (C); 140.1 (C); 128.6 (CH); 128.4 (CH); 126.3 (CH); 122.9 (CH); 121.9 (CH); 120.9 (CH); 114.4 (CH); 111.9 (CH); 63.2 (CH<sub>2</sub>); 55.9 (CH<sub>3</sub>); 49.5 (CH<sub>2</sub>); 32.4 (CH<sub>2</sub>); 31.5 (CH<sub>2</sub>).

**Synthesis of 1-cyclohexyl-4-((2-methoxyphenoxy)methyl)-1H-1,2,3-triazole (6c).**

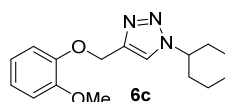

The 1-methoxy-2-(prop-2-yn-1-yloxy)benzene (**4**) (58 mg; 0.36 mmol) and cyclohexyl azide (67.0 mg; 0.54 mmol) was dissolved in 4 ml of H<sub>2</sub>O:<sup>t</sup>BuOH. Following the general procedure for the synthesis of 1,4-disubstituted-1,2,3-triazoles, the reaction was work up and purified to afford 75.0 mg of a colorless oil. (Isolated yield: 73%). <sup>1</sup>H NMR (300 MHz, CDCl<sub>3</sub>) δ: 7.63 (s, 1H); 7.07 (d, *J* = 7.6

H<sub>2</sub>, 1H); 6.94 (m, 1H); 6.91 (s, 1H); 6.90 (m, 1H); 5.28 (s, 2H); 4.43 (tt, *J*<sub>1</sub> = 11.7 Hz, *J*<sub>2</sub> = 3.6 Hz, 1H); 3.87 (s, 3H); 2.20 (dd, *J*<sub>1</sub> = 12.7 Hz, *J*<sub>2</sub> = 2.2 Hz, 2H); 1.93 (dt, *J*<sub>1</sub> = 13.6 Hz, *J*<sub>2</sub> = 3.2 Hz, 2H); 1.75 (dd, *J*<sub>1</sub> = 11.9 Hz, *J*<sub>2</sub> = 3.2 Hz, 2H); 1.73 (dd, *J*<sub>1</sub> = 12.9 Hz, *J*<sub>2</sub> = 3.6 Hz, 2H); 1.45 (qt, *J*<sub>1</sub> = 13.4 Hz, *J*<sub>2</sub> = 3.5 Hz, 1H); 1.27 (qt, *J*<sub>1</sub> = 12.3 Hz, *J*<sub>2</sub> = 3.2 Hz, 1H). <sup>13</sup>C NMR (75 MHz, CDCl<sub>3</sub>) δ : 149.6 (C); 147.7 (C); 143.7 (C); 121.8 (CH); 120.9 (CH); 120.6 (CH); 114.3 (CH); 111.8 (CH); 63.4 (CH<sub>2</sub>); 60.1 (CH); 55.8 (CH<sub>3</sub>); 33.5 (CH<sub>2</sub>); 25.1 (CH<sub>2</sub>); 25.0 (CH<sub>2</sub>).

**Synthesis of 4-((2-methoxyphenoxy)methyl)-1-octyl-1H-1,2,3-triazole (6d).**

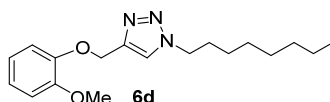

The 1-methoxy-2-(prop-2-yn-1-yloxy)benzene (**4**) (50 mg; 0.31 mmol) and octyl azide (72.0 mg; 0.46 mmol) was dissolved in 4 ml of H<sub>2</sub>O:<sup>t</sup>BuOH. Following the general procedure for the synthesis of 1,4-disubstituted-1,2,3-triazoles, the reaction was work up and purified to afford 77.3 mg of a colorless oil. (Isolated yield: 79%). <sup>1</sup>H NMR (300 MHz, CDCl<sub>3</sub>) δ: 7.61 (s, 1H); 7.04 (dd, *J*<sub>1</sub> = 7.0 Hz, *J*<sub>2</sub> = 2.2 Hz, 1H); 6.94 (m, 1H); 6.90 (s, 1H); 6.89 (dd, *J*<sub>1</sub> = 7.7 Hz, *J*<sub>2</sub> = 2.5 Hz, 1H); 5.30 (s, 2H); 4.32 (t, *J* = 7.3 Hz, 2H); 3.87 (s, 3H); 1.88 (q, *J* = 6.0 Hz, 2H); 1.37-1.20 (m, 10H); 0.87 (t, *J* = 6.0 Hz, 3H). <sup>13</sup>C NMR (75 MHz, CDCl<sub>3</sub>) δ : 149.6 (C); 147.6 (C); 144.3 (C); 122.6 (CH); 121.8 (CH); 120.9 (CH); 114.4 (CH); 111.8 (CH); 63.3 (CH<sub>2</sub>); 55.9 (CH<sub>3</sub>); 50.4 (CH<sub>2</sub>); 31.7 (CH<sub>2</sub>); 30.2 (CH<sub>2</sub>); 29.0 (CH<sub>2</sub>); 28.9 (CH<sub>2</sub>); 26.4 (CH<sub>2</sub>); 22.6 (CH<sub>2</sub>); 14.0 (CH<sub>3</sub>).

**Synthesis of ethyl 2-(4-((2-methoxyphenoxy)methyl)-1H-1,2,3-triazol-1-yl)acetate (6e).**

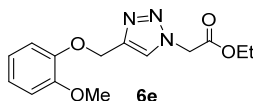

The 1-methoxy-2-(prop-2-yn-1-yloxy)benzene (**4**) (55 mg; 0.34 mmol) and ethyl 2-azidoacetate (66.0 mg; 0.51 mmol) was dissolved in 4 ml of H<sub>2</sub>O:<sup>t</sup>BuOH. Following the general procedure for the synthesis of 1,4-disubstituted-1,2,3-triazoles, the reaction was work up and purified to afford 71.8 mg of a colorless oil. (Isolated yield: 80%). <sup>1</sup>H NMR (300 MHz, CDCl<sub>3</sub>) δ: 7.79 (s, 1H); 7.06 (dd, *J*<sub>1</sub> = 8.3 Hz, *J*<sub>2</sub> = 1.9 Hz, 1H); 6.95 (m, 1H); 6.91 (s, 1H); 6.90 (m, 1H); 5.32 (s, 2H); 5.14 (s, 2H); 4.26 (q, *J* = 6.6 Hz, 2H); 3.87 (s, 3H); 1.28 (t, *J* = 7.1 Hz, 3H). <sup>13</sup>C NMR (75 MHz, CDCl<sub>3</sub>) δ : 166.27 (C); 149.6 (C); 147.6 (C); 144.5 (C); 124.6 (CH); 121.9 (CH); 120.9 (CH); 114.4 (CH); 111.9 (CH); 63.0 (CH<sub>2</sub>); 62.3 (CH<sub>2</sub>); 55.8 (CH<sub>3</sub>); 50.8 (CH<sub>2</sub>); 14.0 (CH<sub>3</sub>).

**Synthesis of 2-((4-propyl-1H-1,2,3-triazol-1-yl)methyl)phenol. (9a).**

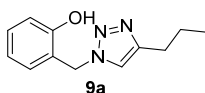

Following the general procedure for the synthesis of 1,4-disubstituted-1,2,3-triazoles, 1-pentyne (79  $\mu\text{L}$ ; 0.8 mmol) and 2-(azidomethyl)phenol (60  $\mu\text{L}$ ; 0.4 mmol) was dissolved in 4 ml of  $\text{H}_2\text{O}:\text{tBuOH}$ . The reaction was worked up and purified to afford 85.5 mg of a white solid. (Isolated yield: 98%). Mp: 97.3-98.1°C.  $^1\text{H NMR}$  (300 MHz,  $\text{CDCl}_3$ )  $\delta$ : 7.39 (s, 1H), 7.24-7.18 (m, 2H), 6.97 (m, 1H), 6.89 (m, 1H), 5.47 (s, 2H), 2.66 (t,  $J = 7.6$  Hz, 2H), 1.73-1.60 (m, 2H), 0.94 (t,  $J = 7.3$  Hz, 3H).  $^{13}\text{C NMR}$  (75 MHz,  $\text{CDCl}_3$ )  $\delta$ : 155.2 (C), 148.4 (C), 130.6 (CH), 130.4 (CH), 121.7 (CH), 121.3 (C), 120.7 (CH), 117.4 (CH), 50.1 ( $\text{CH}_2$ ), 27.6 ( $\text{CH}_2$ ), 22.6 ( $\text{CH}_2$ ), 13.8 ( $\text{CH}_3$ ). ESI-HRMS Calcd for ( $\text{M}+\text{H}^+$ )  $\text{C}_{12}\text{H}_{16}\text{N}_3\text{O}$  218.12294; found 252.1131.

**Synthesis of 2-((4-pentyl-1H-1,2,3-triazol-1-yl)methyl)phenol (9b).**

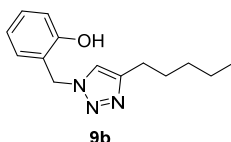

Following the general procedure for the synthesis of 1,4-disubstituted-1,2,3-triazoles, 1-heptyne (106  $\mu\text{L}$ ; 0.8 mmol) and 2-(azidomethyl)phenol (60  $\mu\text{L}$ ; 0.4 mmol) was and dissolved in 4 ml of  $\text{H}_2\text{O}:\text{tBuOH}$ . The reaction was worked up and purified to afford 38.9 mg of a white solid. (Isolated yield: 39%). Mp: 88.2-89.2°C.  $^1\text{H NMR}$  (300 MHz,  $\text{CDCl}_3$ )  $\delta$ : 7.45 (s, 1H), 7.24 (s, 1H), 7.19 (d,  $J = 7.8$  Hz, 1H), 7.01 (d,  $J = 7.8$  Hz, 1H), 6.86 (t,  $J = 7.3$  Hz, 1H), 5.52 (s, 2H), 2.67 (t,  $J = 7.7$  Hz, 2H), 1.63 (p,  $J = 7.5$  Hz, 2H), 1.36-1.34 (m, 4H), 0.85 (t,  $J = 6.8$  Hz, 3H).  $^{13}\text{C NMR}$  (75 MHz,  $\text{CDCl}_3$ )  $\delta$ : 155.4 (C), 148.4 (C), 130.4 (CH), 130.4 (CH), 121.6 (CH), 121.5 (C), 120.3 (CH), 116.9 (CH), 49.8 ( $\text{CH}_2$ ), 31.4 ( $\text{CH}_2$ ), 29.0 ( $\text{CH}_2$ ), 25.5 ( $\text{CH}_2$ ), 22.3 ( $\text{CH}_2$ ), 13.9 ( $\text{CH}_3$ ). ESI-HRMS Calcd for ( $\text{M}+\text{H}^+$ )  $\text{C}_{14}\text{H}_{19}\text{N}_3\text{O}$  246.16064, found 246.1601.

**Synthesis of 2-((4-octyl-1H-1,2,3-triazol-1-yl)methyl)phenol (9c).**

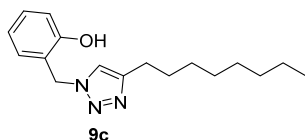

Following the general procedure for the synthesis of 1,4-disubstituted-1,2,3-triazoles, 1-decyne (37  $\mu\text{L}$ ; 0.4 mmol) and 2-(azidomethyl)phenol (60  $\mu\text{L}$ ; 0.4 mmol) was dissolved in 4 ml of  $\text{H}_2\text{O}:\text{tBuOH}$ . The reaction was worked up and purified to afford 66.5 mg of a white solid. (Isolated yield: 57%). Mp: 77.3-77.9  $^\circ\text{C}$ .  $^1\text{H NMR}$  (300 MHz,  $\text{CDCl}_3$ )  $\delta$ : 7.47 (s, 1H), 7.19 (d,  $J=7.8$  Hz, 2H), 7.03 (d,  $J=7.6$  Hz, 1H), 6.85 (d,  $J=7.4$  Hz, 1H), 5.53 (s, 2H), 2.67 (t,  $J=7.6$  Hz, 2H), 1.63 (p,  $J=7.7$  Hz, 2H), 1.28-1.23 (m, 10H), 0.85 (t,  $J=6.9$  Hz, 3H).  $^{13}\text{C RMN}$  (75 MHz,  $\text{CDCl}_3$ )  $\delta$ : 155.4 (C), 148.4 (C), 130.4 (CH), 130.4 (CH), 121.5 (CH), 120.2 (CH), 116.7 (CH), 49.8 ( $\text{CH}_2$ ), 31.8 ( $\text{CH}_2$ ), 29.4 ( $\text{CH}_2$ ), 29.3 ( $\text{CH}_2$ ), 29.3 ( $\text{CH}_2$ ), 29.2 ( $\text{CH}_2$ ), 25.5 ( $\text{CH}_2$ ), 22.6 ( $\text{CH}_2$ ), 14.1 ( $\text{CH}_3$ ). ESI-HRMS Calcd for ( $\text{M}+\text{H}^+$ )  $\text{C}_{17}\text{H}_{25}\text{N}_3\text{O}$  288.20459, found 288.2070.

**Synthesis of 2-((4-phenyl-1H-1,2,3-triazol-1-yl)methyl)phenol (9d).**

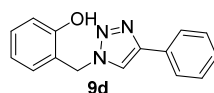

Following the general procedure for the synthesis of 1,4-disubstituted-1,2,3-triazoles, 1-decyne (44  $\mu\text{L}$ ; 0.4 mmol) and 2-(azidomethyl)phenol (60  $\mu\text{L}$ ; 0.4 mmol) was dissolved in 4 ml of  $\text{H}_2\text{O}:\text{tBuOH}$ . The reaction was worked up and purified to afford 89.2 mg of a white solid. (Isolated yield: 88%). Mp: 202.1-203.1  $^\circ\text{C}$ .  $^1\text{H NMR}$  (300 MHz,  $\text{CDCl}_3$ )  $\delta$ : 7.69 (s, 1H), 7.55 (m, 2H), 7.22-6.88 (m, 5H), 6.80-6.50 (m, 2H), 5.34 (s, 2H).  $^{13}\text{C NMR}$  (75 MHz,  $\text{CDCl}_3$ )  $\delta$ : 155.3 (C), 147.2 (C), 130.7 (C), 130.2 (CH), 130.0 (CH), 128.6 (CH), 127.8 (CH), 125.4 (CH), 121.2 (C), 120.1 (CH), 119.5 (CH), 115.8 (CH), 49.3 ( $\text{CH}_2$ ). ESI-HRMS Calcd for ( $\text{M}+\text{H}^+$ )  $\text{C}_{15}\text{H}_{14}\text{N}_3\text{O}$  252.11359, found 252.1131.

**Synthesis 2-((4-phenethyl-1H-1,2,3-triazol-1-yl)methyl)phenol (9e).**

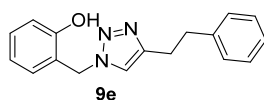

Following the general procedure for the synthesis of 1,4-disubstituted-1,2,3-triazoles, 4-phenyl-1-butyne (52  $\mu\text{L}$ ; 0.4 mmol) and 2-(azidomethyl)phenol (60  $\mu\text{L}$ ; 0.4 mmol) was dissolved in 4 ml of  $\text{H}_2\text{O}:\text{tBuOH}$ . The reaction was worked up and purified to afford 46.4 mg of a white solid. (Isolated yield: 41%). MP: 129.6-130.4  $^\circ\text{C}$ .  $^1\text{H NMR}$  (300 MHz,  $\text{CDCl}_3$ )  $\delta$ : 7.24-7.11 (m, 8H); 6.95 (m, 1H); 6.89 (m, 1H); 5.46 (s, 2H); 2.97 (m, 4H).  $^{13}\text{C NMR}$  (75 MHz,  $\text{CDCl}_3$ )  $\delta$ : 155.0 (C); 147.4 (C); 141.0 (C); 130.6 (CH); 130.3 (CH); 128.4 (CH); 128.4 (CH); 126.1 (CH); 121.7 (CH); 121.6 (C); 120.8

(CH); 117.3 (CH); 50.0 (CH<sub>2</sub>); 35.5 (CH<sub>2</sub>); 27.5 (CH<sub>2</sub>). **ESI-HRMS Calcd for (M+H<sup>+</sup>)** C<sub>17</sub>H<sub>18</sub>N<sub>3</sub>O 280.14499; found 280.1444.

### General procedure for synthesis of 1,2,3–triazoles by thermic cycloaddition.

Alkyne (1 eq) and the azide (1 eq) were suspended in 2 mL/eq of toluene. The mixture was stirred and heated under reflux for 35 hours. Then was allowed to go to room temperature. Brine was added and the solution was extracted with dichloromethane. Combined organic extracts were dried with sodium sulphate and evaporated. The resulting residue was purified by column chromatography over silica gel using an increasing AcOEt/hexane gradient to afford desired pure products.

### Synthesis of compounds 11a to 15f.

#### *Synthesis of (1-benzyl-4-pentyl-1H-1,2,3-triazol-5-yl)methanol (11a) and (1-benzyl-5-pentyl-1H-1,2,3-triazol-4-yl)methanol (11b)*

Following the general procedure for the synthesis of 1,2,3–triazoles by thermic cycloaddition, oct-2-yn-1-ol (95  $\mu$ L; 0.75mmol) and benzyl azide (100  $\mu$ L; 0.75 mmol) were added in 2 ml of toluene. The reaction is heated under reflux for 35 hours. The reaction was worked up and purified to afford 59.4 mg of a white solid corresponding to the compound **11a** and 42.2 mg of a white solid corresponding to the compound **11b**. (Isolated yield: 52%).

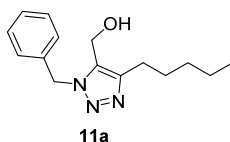

**(1-benzyl-4-pentyl-1H-1,2,3-triazol-5-yl)methanol (11a)**. MP: 59.3-60.0°C. <sup>1</sup>H NMR (300 MHz, CDCl<sub>3</sub>)  $\delta$  : 7.29-7.30 (m, 3H); 7.22-7.19 (m, 2H); 5.59 (s, 2H); 4.53 (d, *J* = 4,7 Hz, 2H); 2.56 (t, *J* = 7,7 Hz, 2H); 1.60 (p, *J* = 7,0 Hz, 2H); 1.27 (m, 4H); 0.85 (t, *J* = 6,5 Hz, 3H). <sup>13</sup>C NMR (75 MHz, CDCl<sub>3</sub>)  $\delta$  : 146.5 (C); 135.2 (C); 131.9 (C); 128.9 (CH); 128.3(CH); 127.5 (CH); 52.3 (CH<sub>2</sub>); 52.1 (CH<sub>2</sub>); 31.5 (CH<sub>2</sub>); 29.6 (CH<sub>2</sub>); 26.8 (CH<sub>2</sub>); 22.4 (CH<sub>2</sub>); 14.0 (CH<sub>3</sub>). **ESI-HRMS Calcd for (M+H<sup>+</sup>)** C<sub>15</sub>H<sub>21</sub>N<sub>3</sub>O 260.17629; found 260.1757.

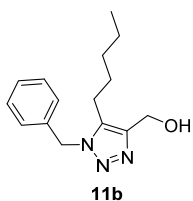

**(1-benzyl-5-pentyl-1H-1,2,3-triazol-4-yl)methanol (11b).** MP: 52.1-52.9°C. <sup>1</sup>H NMR (300 MHz, CDCl<sub>3</sub>) δ : 7.35-7.30 (m, 3H, H); 7.17- 7.15 (m, 2H); 5.49 (s, 2H); 4.71 (s, 2H); 2.57 (t, *J* = 7.6 Hz, 2H); 1.40-1.30 (m, 2H); 1.22-1.18 (m, 4H); 0.81 (t, *J* = 6.8 Hz, 3H). ESI-HRMS Calcd for (M+H<sup>+</sup>) C<sub>15</sub>H<sub>21</sub>N<sub>3</sub>O 260.17629; found 260.1757.

#### Synthesis of (1-benzyl-5-phenyl-1H-1,2,3-triazol-4-yl) methanol (11c)

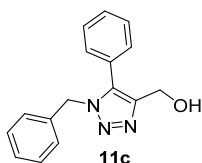

Following the general procedure for the synthesis of 1,2,3-triazoles by thermic cycloaddition, 3-phenylprop-2-yn-1-ol (77 μL; 0.75 mmol) and benzyl azide (100 μL; 0.75 mmol) were added in 2 ml of toluene. The reaction is heated under reflux for 35 hours. The reaction was worked up and purified to afford 77.8 mg of a white solid. (Isolated yield: 76%). MP: 119,7-120,5 °C. <sup>1</sup>H NMR (300 MHz, CDCl<sub>3</sub>): δ : 7.45-7.43 (m, 3H,); 7.26-7.23 (m, 5H); 7.06-7.03 (m, 2H); 5.47 (s, 2H); 4.68 (s, 2H). <sup>13</sup>C NMR (75 MHz, CDCl<sub>3</sub>) δ : 145.0 (C), 135.9 (C), 135.3 (C), 129.7(CH), 129.0(CH), 128.8 (CH), 128.2 (CH), 127.3(CH), 126.4(C), 55.8 (CH<sub>2</sub>), 52.1 (CH<sub>2</sub>). ESI-HRMS Calcd for (M+H<sup>+</sup>) C<sub>17</sub>H<sub>18</sub>N<sub>3</sub>O 266.12934; found 266.1288.

#### Synthesis of 1-(1-benzyl-4-ethyl-1H-1,2,3-triazol-5-yl)ethan-1-ol (11d) and 1-(1-benzyl-5-ethyl-1H-1,2,3-triazol-4-yl)ethan-1-ol (11e).

Following the general procedure for the synthesis of 1,2,3-triazoles by thermic cycloaddition, hex-3-yn-2-ol (90 μL; 0.90 mmol) and benzyl azide (120 μL; 0.90 mmol) were added in 2 ml of toluene. The reaction is heated under reflux for 35 hours. The reaction was worked up and purified to afford 46.5 mg of a white solid corresponding to compound **11d** and 56.5 mg of a colorless oil corresponding to compound **11e** (Isolated yield: 56%).

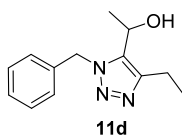

**1-(1-benzyl-4-ethyl-1H-1,2,3-triazol-5-yl)ethan-1-ol (11d).** MP: 86,3-87,2°C.  $^1\text{H NMR}$  (300 MHz,  $\text{CDCl}_3$ ):  $\delta$  : 7.33-7.29 (m, 3H); 7.17-7.15 (m, 2H); 5.48 (s, 2H); 4.98 (s, 1H); 2.63 (q,  $J = 7.7$  Hz, 2H); 1.62 (d,  $J = 7.7$  Hz, 3H); 1.00 (t,  $J = 7,7$  Hz, 3H).  $^{13}\text{C NMR}$  (75 MHz,  $\text{CDCl}_3$ )  $\delta$  : 147.8 (C); 135.1 (C); 134.8 (C); 129.0 (CH); 128.3 (CH); 127.1 (CH); 63.1 (CH); 51.8 ( $\text{CH}_2$ ); 23,6 ( $\text{CH}_3$ ); 16,1 ( $\text{CH}_2$ ); 13,5 ( $\text{CH}_3$ ). ESI-HRMS Calcd for ( $\text{M}+\text{H}^+$ )  $\text{C}_{13}\text{H}_{18}\text{N}_3\text{O}$  232.14499; found 232.14444.

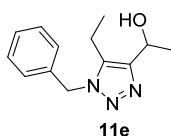

**1-(1-benzyl-5-ethyl-1H-1,2,3-triazol-4-yl)ethan-1-ol (11e).**  $^1\text{H NMR}$  (300 MHz,  $\text{CDCl}_3$ ):  $\delta$  : 7.30-7.14 (m, 5H); 5.59 (q,  $J = 14.8$  Hz, 2H); 5.04 (q,  $J = 7.1$  Hz, 1H); 2.69-2.61 (m, 2H); 1.28-1.26 (d,  $J = 6.8$  Hz, 3H); 1.24-1.21 (t,  $J = 3.5$  Hz, 3H).  $^{13}\text{C NMR}$  (75 MHz,  $\text{CDCl}_3$ )  $\delta$  : 146.0 (C); 135.9 (C); 135.2 (C); 128.8 (CH); 128.1 (CH); 127.2 (CH); 60.9 (CH); 52.5 ( $\text{CH}_2$ ); 22.6 ( $\text{CH}_3$ ); 18.7 ( $\text{CH}_2$ ); 14.2 ( $\text{CH}_3$ ). ESI-HRMS Calcd for ( $\text{M}+\text{H}^+$ )  $\text{C}_{13}\text{H}_{18}\text{N}_3\text{O}$  232.14499; found 232.1444.

**Synthesis of (4-pentyl-1-(3-phenylpropyl)-1H-1,2,3-triazol-5-yl)methanol (13a) y (5-pentyl-1-(3-phenylpropyl)-1H-1,2,3-triazol-4-yl)methanol (13b).**

Following the general procedure for the synthesis of 1,2,3-triazoles by thermic cycloaddition, oct-2-yn-1-ol (95  $\mu\text{L}$ ; 0,62 mmol) and phenyl propil azide (100  $\mu\text{L}$ ; 0,62 mmol) were added in 2 ml of toluene. The reaction is heated under reflux for 35 hours. The reaction was worked up and purified to afford 41 mg of a colorless oil corresponding to compound **13a** and 40. mg of a colorless oil corresponding to compound **13b** (Isolated yield: 46%).

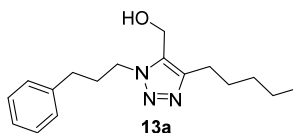

**(4-pentyl-1-(3-phenylpropyl)-1H-1,2,3-triazol-5-yl)methanol (13a).**  $^1\text{H NMR}$  (300 MHz,  $\text{CDCl}_3$ )  $\delta$  : 7.31-7.17 (m, 5H); 4.62 (d,  $J = 4.3$  Hz, 2H); 4.36 (t,  $J = 7.3$  Hz, 2H); 2.69 (t,  $J = 7.3$  Hz, 2H); 2.61 (t,  $J = 7.6$  Hz, 2H); 2.29 (q,  $J = 7.1$  Hz, 2H); 1.68-1.62 (m, 2H); 1.31 (m, 4H, C7-H); 0.88 (t,  $J = 7.0$  Hz,

3H).  $^{13}\text{C}$  NMR (75 MHz,  $\text{CDCl}_3$ )  $\delta$  : 146.1 (C); 140.6 (C); 131.3 (C); 128.5 (CH); 128.4 (CH); 126.2 (CH); 52.3 ( $\text{CH}_2$ ); 47.9 ( $\text{CH}_2$ ); 32.7 ( $\text{CH}_2$ ); 31.5 ( $\text{CH}_2$ ); 31.4 ( $\text{CH}_2$ ); 29.7 ( $\text{CH}_2$ ); 24.9 ( $\text{CH}_2$ ); 22.4 ( $\text{CH}_2$ ); 14.0 ( $\text{CH}_3$ ).ESI-HRMS Calcd for ( $\text{M}+\text{H}^+$ )  $\text{C}_{17}\text{H}_{26}\text{N}_3\text{O}$  288.20759; found 288.2070.

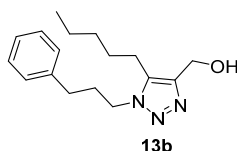

**(5-pentyl-1-(3-phenylpropyl)-1H-1,2,3-triazol-4-yl)methanol (13b).**  $^1\text{H}$  NMR (300 MHz,  $\text{CDCl}_3$ )  $\delta$  : 7.31-7.17 (m, 5H); 4.62 (d,  $J = 4.3$  Hz, 2H); 4.36 (t,  $J = 7.3$  Hz, 2H); 2.69 (t,  $J = 7.3$  Hz, 2H); 2.61 (t,  $J = 7.6$  Hz, 2H); 2.29 (q,  $J = 7.1$  Hz, 2H); 1.68-1.62 (m, 2H); 1.31 (m, 4H); 0.88 (t,  $J = 7.0$  Hz, 3H).  $^{13}\text{C}$  NMR (75 MHz,  $\text{CDCl}_3$ )  $\delta$  : 146.1 (C); 140.6 (C); 131.3 (C); 128.5 (CH); 128.4 (CH); 126.2 (CH); 52.3 ( $\text{CH}_2$ ); 47.9 ( $\text{CH}_2$ ); 32.7 ( $\text{CH}_2$ ); 31.5 ( $\text{CH}_2$ ); 31.4 ( $\text{CH}_2$ ); 29.7 ( $\text{CH}_2$ ); 24.9 ( $\text{CH}_2$ ); 22.4 ( $\text{CH}_2$ ); 14.0 ( $\text{CH}_3$ ).ESI-HRMS Calcd for ( $\text{M}+\text{H}^+$ )  $\text{C}_{17}\text{H}_{26}\text{N}_3\text{O}$  288.20759; found 288.20704.

**Synthesis of (4-phenyl-1-(3-phenylpropyl)-1H-1,2,3-triazol-5-yl)methanol (13c) y (5-phenyl-1-(3-phenylpropyl)-1H-1,2,3-triazol-4-yl)methanol (13d).**

Following the general procedure for the synthesis of 1,2,3-triazoles by thermic cycloaddition, 3-phenylprop-2-yn-1-ol (63  $\mu\text{L}$ ; 0,62 mmol) and phenyl propil azide (100  $\mu\text{L}$ ; 0,62 mmol) were added in 2 ml of toluene. The reaction is heated under reflux for 35 hours. The reaction was worked up and purified to afford 46.9 mg of a white solid corresponding to compound **13c** and 74.0 mg of a white solid corresponding to compound **13d** (Isolated yield: 66%).

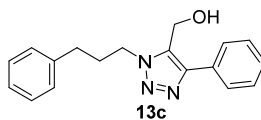

**(4-phenyl-1-(3-phenylpropyl)-1H-1,2,3-triazol-5-yl)methanol (13c).** MP: 82.6-83.1 $^{\circ}\text{C}$ .  $^1\text{H}$  NMR (300 MHz,  $\text{CDCl}_3$ ):  $\delta$  : 7.65 (d,  $J = 6.9$  Hz, 2H); 7.44-7.28 (m, 5H); 7.22-7.17 (m, 3H); 4.76 (d,  $J = 4.2$  Hz, 2H); 4.39 (d,  $J = 7.3$  Hz, 2H); 2.71 (t,  $J = 7.3$  Hz, 2H); 2.31 (t,  $J = 7.3$  Hz, 3H).  $^{13}\text{C}$  NMR (75 MHz,  $\text{CDCl}_3$ )  $\delta$  :  $\delta$  : 145.9 (C); 140.4 (C); 131.5 (C); 130.7 (C); 128.8 (CH); 128.6 (CH); 128.4 (CH); 128.2 (CH); 127.7 (CH); 126.3 (CH); 52.6 ( $\text{CH}_2$ ); 48.0 ( $\text{CH}_2$ ); 32.7 ( $\text{CH}_2$ ); 31.4 ( $\text{CH}_2$ ).ESI-HRMS Calcd for ( $\text{M}+\text{H}^+$ )  $\text{C}_{18}\text{H}_{20}\text{N}_3\text{O}$  294.16064; found 294.1601.



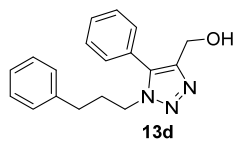

**(5-phenyl-1-(3-phenylpropyl)-1H-1,2,3-triazol-4-yl)methanol (13d).** MP: 81.2-82.0 °C.  $^1\text{H NMR}$  (300 MHz,  $\text{CDCl}_3$ ):  $\delta$  : 7.49-7.47 (m, 3H); 7.36-7.33 (m, 2H); 7.23-7.19 (m, 3H); 7.04 (m, 2H); 4.67(s, 2H); 4.28 (t,  $J$  = 4.3 Hz, 2H); 2.57 (t,  $J$  = 7.3 Hz, 2H); 2.13 (p,  $J$  = 7,3 Hz, 3H).  $^{13}\text{C NMR}$  (75 MHz,  $\text{CDCl}_3$ )  $\delta$ : 140.2 (C); 129.6 (C); 129.5 (C); 129.2 (C); 128.5 (CH); 128.5 (CH); 128.3 (CH); 128.3 (CH); 126.6 (CH); 126.2 (CH); 55.6 ( $\text{CH}_2$ ); 47.8 ( $\text{CH}_2$ ); 32.5 ( $\text{CH}_2$ ); 31.3 ( $\text{CH}_2$ ). **ESI-HRMS Calcd for ( $\text{M}+\text{H}^+$ )**  $\text{C}_{18}\text{H}_{20}\text{N}_3\text{O}$  294.16064; found 294.1601.

**Synthesis of 1-(4-ethyl-1-(3-phenylpropyl)-1H-1,2,3-triazol-5-yl)ethan-1-ol(13e) y 1-(5-ethyl-1-(3-phenylpropyl)-1H-1,2,3-triazol-4-yl)ethan-1-ol (13f).**

Following the general procedure for the synthesis of 1,2,3-triazoles by thermic cycloaddition, hex-3-yn-2-ol (73  $\mu\text{L}$ ; 0.74 mmol) and phenyl propil azide (120  $\mu\text{L}$ ; 0.74 mmol) were added in 2 ml of toluene. The reaction is heated under reflux for 35 hours. The reaction was worked up and purified to afford 30.8 mg of a colorless oil corresponding to compound **13e** and 49.6 mg of a colorless oil corresponding to compound **13f**. (Isolated yield: 42%).

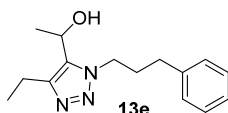

**1-(4-ethyl-1-(3-phenylpropyl)-1H-1,2,3-triazol-5-yl)ethan-1-ol(13e).**  $^1\text{H NMR}$  (300 MHz,  $\text{CDCl}_3$ )  $\delta$  : 7.30-7.27 (m, 1H); 7.25 (m, 1H); 7.21-7.15 (m, 3H); 5.06 (q,  $J$  = 6.7 Hz, 1H); 4.36 (t,  $J$  = 7.4 Hz, 2H); 2.68 (t,  $J$  = 7.7 Hz, 2H); 2.63- 2.57 (m, 3H); 2.28-2.19 (m, 2H); 1.50 (t,  $J$  = 6.8 Hz, 3H); 1.19 (t,  $J$  = 7.6 Hz, 3H).  $^{13}\text{C NMR}$  (75 MHz,  $\text{CDCl}_3$ ):  $\delta$  : 145.4 (C); 140.7 (C); 134.8 (C); 128.5 (CH); 128.5 (CH); 128.4 (CH); 128.4 (CH); 126.2 (CH); 60.7 (CH); 48.3 ( $\text{CH}_3$ ); 32.8 ( $\text{CH}_2$ ); 31.7 ( $\text{CH}_2$ ); 23.0 ( $\text{CH}_3$ ); 18.6 ( $\text{CH}_2$ ); 14.3 ( $\text{CH}_2$ ). **ESI-HRMS Calcd for ( $\text{M}+\text{H}^+$ )**  $\text{C}_{15}\text{H}_{22}\text{N}_3\text{O}$  260.3467; found 260.1757.

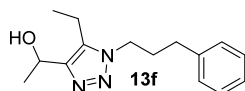

**1-(5-ethyl-1-(3-phenylpropyl)-1H-1,2,3-triazol-4-yl)ethan-1-ol (13f)**  $^1\text{H NMR}$  (300 MHz,  $\text{CDCl}_3$ )  $\delta$  : 7.31-7.27 (m, 2H); 7.22-7.17 (m, 3H); 4.98 (t,  $J$  = 5.8 Hz, 1H); 4.19 (t,  $J$  = 7.6 Hz, 3H); 2.69 (t,  $J$  =

7.4 Hz, 2H); 2.62 (t,  $J = 7.5$  Hz, 2H); 2.23 (p,  $J = 7.3$  Hz, 2H); 1.62 (d,  $J = 6.5$  Hz, 3H); 1.14 (t,  $J = 7.6$  Hz, 3H).  $^{13}\text{C}$  NMR (75 MHz,  $\text{CDCl}_3$ ):  $\delta$  : 147.6(C); 140.3 (C); 134.4 (C); 128.6 (CH); 128.4 (CH); 126.3 (CH); 63.1 (CH); 46.9 ( $\text{CH}_3$ ); 32.7 ( $\text{CH}_2$ ); 31.5 ( $\text{CH}_2$ ); 23.6 ( $\text{CH}_3$ ); 16.0 ( $\text{CH}_2$ ); 14.0 ( $\text{CH}_2$ ). ESI-HRMS Calcd for ( $\text{M}+\text{H}^+$ )  $\text{C}_{15}\text{H}_{22}\text{N}_3\text{O}$  260.3467; found 260.1757.

**Synthesis of (1-(naphthalen-2-ylmethyl)-4-pentyl-1H-1,2,3-triazol-5-yl)methanol (15a) y (1-(naphthalen-2-ylmethyl)-5-pentyl-1H-1,2,3-triazol-4-yl)methanol (15b).**

Following the general procedure for the synthesis of 1,2,3-triazoles by thermic cycloaddition, oct-2-yn-1-ol (73  $\mu\text{L}$ ; 0.38 mmol) and (3-azidopropyl)benzene (70  $\mu\text{L}$ ; 0.38 mmol) were added in 2 ml of toluene. The reaction is heated under reflux for 35 hours. The reaction was worked up and purified to afford 29.1 mg of a white solid corresponding to compound **15a** and 52.7 mg of a white solid corresponding to compound **15b**. (Isolated yield: 69%).

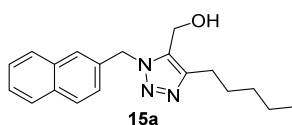

**(1-(naphthalen-2-ylmethyl)-4-pentyl-1H-1,2,3-triazol-5-yl)methanol (15a).** MP: 90.5-91.3  $^{\circ}\text{C}$ .  $^1\text{H}$  NMR (300 MHz,  $\text{CDCl}_3$ )  $\delta$  : 7.82-7.77 (m, 3H); 7.68 (s, 1H); 7.50-7.47 (m, 2H); 7.34 (m, 1H); 5.78 (s, 2H); 4.54 (d,  $J = 5.4$  Hz, 2H); 2.63 (t,  $J = 7.5$  Hz, 2H); 1.66-1.62 (m, 2H); 1.32-1.30 (m, 4H); 0.87 (t,  $J = 6.8$  Hz, 3H).  $^{13}\text{C}$  NMR (75 MHz,  $\text{CDCl}_3$ )  $\delta$  : 133.2 (C); 133.1 (C); 132.6 (C); 129.0 (CH); 127.9 (CH); 127.8 (CH); 126.6 (CH); 126.5 (CH); 125.0 (CH); 52.7 ( $\text{CH}_2$ ); 52.6 ( $\text{CH}_2$ ); 31.5 ( $\text{CH}_2$ ); 29.6 ( $\text{CH}_2$ ); 24.9 ( $\text{CH}_2$ ); 22.4 ( $\text{CH}_2$ ); 14.0 ( $\text{CH}_3$ ). ESI-HRMS Calcd for ( $\text{M}+\text{H}^+$ )  $\text{C}_{19}\text{H}_{24}\text{N}_3\text{O}$  310.18411; found 310.1904.

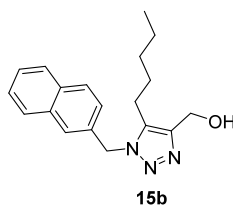

**(1-(naphthalen-2-ylmethyl)-5-pentyl-1H-1,2,3-triazol-4-yl)methanol (15b).** MP: 79.2-80.2  $^{\circ}\text{C}$ .  $^1\text{H}$  NMR (300 MHz,  $\text{CDCl}_3$ ):  $\delta$  : 7.80 (m, 3H); 7.76 (s, 1H); 7.50-7.47 (m, 2H); 7.27 (m, 1H); 5.64 (s, 2H); 4.72 (d,  $J = 5.4$  Hz, 2H); 2.59 (t,  $J = 7.5$  Hz, 2H); 1.34 (p,  $J = 7.5$  Hz, 2H); 1.14-1.12 (m, 4H); 0.72 (t,  $J = 7.0$  Hz, 3H).  $^{13}\text{C}$  NMR (75 MHz,  $\text{CDCl}_3$ ):  $\delta$  : 144.9 (C); 135.2 (C); 133.2 (C); 133.0 (C); 132.4 (C); 129.0

(CH); 127.8 (CH); 127.8 (CH); 126.6 (CH); 126.5 (CH); 126.2 (CH); 124.7 (CH); 55.9 (CH<sub>2</sub>); 52.2 (CH<sub>2</sub>); 31.4 (CH<sub>2</sub>); 28.5 (CH<sub>2</sub>); 22.6 (CH<sub>2</sub>); 22.1 (CH<sub>2</sub>); 13.7 (CH<sub>3</sub>). **ESI-HRMS Calcd for (M+H<sup>+</sup>)** C<sub>19</sub>H<sub>24</sub>N<sub>3</sub>O 310.18411; found 310.1904.

**Synthesis of (1-(naphthalen-2-ylmethyl)-4-phenyl-1H-1,2,3-triazol-5-yl)methanol (15c) and (1-(naphthalen-2-ylmethyl)-5-phenyl-1H-1,2,3-triazol-4-yl)methanol (15d).**

Following the general procedure for the synthesis of 1,2,3-triazoles by thermic cycloaddition, 3-phenylprop-2-yn-1-ol (39  $\mu$ L; 0.38 mmol) and (3-azidopropyl)benzene (70  $\mu$ L; 0.38 mmol) were added in 2 ml of toluene. The reaction is heated under reflux for 35 hours. The reaction was worked up and purified to afford 44.0 mg of a white solid corresponding to compound **15c** and 77.8 mg of a white solid corresponding to compound **15d**. (Isolated yield: 94%).

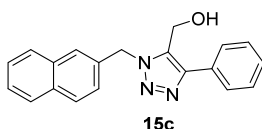

**(1-(naphthalen-2-ylmethyl)-4-phenyl-1H-1,2,3-triazol-5-yl)methanol (15c).** MP: 138.1-139.0 °C. <sup>1</sup>H NMR (300 MHz, CDCl<sub>3</sub>)  $\delta$ : 7.83-7.66 (s, 6H); 7.51-7.36 (s, 6H); 5.82 (s, 2H); 4.71 (s, 2H). <sup>13</sup>C NMR (75 MHz, CDCl<sub>3</sub>)  $\delta$ : 146.6 (C); 133.2 (C); 133.2 (C); 133.1 (C); 132.3 (C); 131.6 (C); 130.6 (CH); 129.2 (CH); 128.8 (CH); 128.3 (CH); 128.0 (CH); 127.8 (CH); 127.7 (CH); 126.7 (CH); 126.6 (CH); 126.6 (CH); 124.9 (CH); 52.8 (CH<sub>2</sub>); 52.7(CH<sub>2</sub>). **ESI-HRMS Calcd for (M+H<sup>+</sup>)** C<sub>20</sub>H<sub>17</sub>N<sub>3</sub>O 316.14499; found 316.1437.

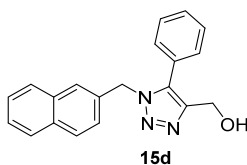

**(1-(naphthalen-2-ylmethyl)-5-phenyl-1H-1,2,3-triazol-4-yl)methanol (15d)** MP: 170.2-171.1 °C. <sup>1</sup>H NMR (300 MHz, CDCl<sub>3</sub>)  $\delta$ : 7.79-7.69 (s, 3H); 7.49-7.42 (s, 6H); 7.24-7.20 (s, 3H); 5.63 (s, 2H); 4.70 (s, 2H). <sup>13</sup>C NMR (75 MHz, CDCl<sub>3</sub>)  $\delta$ : 144.9 (C); 133.1 (C); 132.9 (C); 132.7 (C); 132.7 (C); 131.9(C);

129.7 (CH); 129.7 (CH); 129.0 (CH); 128.8 (CH); 127.9 (CH); 127.9 (CH); 127.7 (CH); 126.5 (CH); 126.4 (CH); 124.8 (CH); 56.0 (CH<sub>2</sub>); 52.3 (CH<sub>2</sub>).ESI-HRMS Calcd for (M+H<sup>+</sup>) C<sub>20</sub>H<sub>17</sub>N<sub>3</sub>O 316.14499; found 316.1437.

**Synthesis of 1-(4-ethyl-1-(naphthalen-2-ylmethyl)-1H-1,2,3-triazol-5-yl)ethan-1-ol (15e) and 1-(5-ethyl-1-(naphthalen-2-ylmethyl)-1H-1,2,3-triazol-4-yl)ethan-1-ol (15f).**

Following the general procedure for the synthesis of 1,2,3-triazoles by thermic cycloaddition, hex-3-yn-2-ol (43  $\mu$ L; 0.44 mmol) and (3-azidopropyl)benzene (80  $\mu$ L; 0.44 mmol) were added in 2 ml of toluene. The reaction is heated under reflux for 35 hours. The reaction was worked up and purified to afford 43.3 mg of a white solid corresponding to compound **15e** and 49.3 mg of a white solid corresponding to compound **15f**. (Isolated yield: 75%).

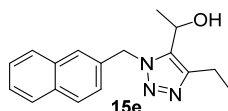

**1-(4-ethyl-1-(naphthalen-2-ylmethyl)-1H-1,2,3-triazol-5-yl)ethan-1-ol (15e).** MP: 93.4-94.3 °C. <sup>1</sup>H NMR (300 MHz, CDCl<sub>3</sub>)  $\delta$ : 7.89-7.45 (m, 3H); 7.61 (s, 1H); 7.45 (m, 2H); 7.30 (m, 1H); 5.76 (dd,  $J_1$ = 15.4 Hz,  $J_2$ = 8.5 Hz, 2H); 5.08 (q,  $J$  = 6.7 Hz, 2H); 2.69 (m, 2H); 1.28 (t,  $J$  = 6.9 Hz, 3H); 1.23 (t,  $J_1$ = 7.3 Hz, 3H). <sup>13</sup>C NMR (75 MHz, CDCl<sub>3</sub>)  $\delta$ : 146.2 (C); 134.9 (C); 133.3 (C); 133.2 (C); 133.0 (C); 128.8 (CH); 127.9 (CH); 127.7 (CH); 126.5 (CH); 126.4 (CH); 126.2 (CH); 124.9 (CH); 61.2 (CH); 52.7 (CH<sub>2</sub>); 22.7 (CH<sub>3</sub>); 18.8 (CH<sub>2</sub>); 14.3 (CH<sub>3</sub>). ESI-HRMS Calcd for (M+H<sup>+</sup>) C<sub>20</sub>H<sub>17</sub>N<sub>3</sub>O 282.16064; found 282.1601.

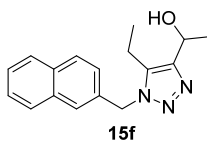

**1-(5-ethyl-1-(naphthalen-2-ylmethyl)-1H-1,2,3-triazol-4-yl)ethan-1-ol (15f).** MP: 105.2-106.0 °C. <sup>1</sup>H NMR (300 MHz, CDCl<sub>3</sub>)  $\delta$ : 7.83-7.77 (m, 3H); 7.61 (s, 1H); 7.50-7.47 (m, 2H); 7.29 (m, 1H); 5.64 (s, 2H); 5.00 (q,  $J$  = 6.7 Hz, 2H); 2.65 (q,  $J$  = 7.7 Hz, 2H); 1.64 (d,  $J_1$  = 6.7 Hz, 3H); 1.01 (t,  $J$  = 7.6 Hz, 3H). <sup>13</sup>C NMR (75 MHz, CDCl<sub>3</sub>)  $\delta$ : 147.9 (C); 134.9 (C); 133.2 (C); 133.0 (C); 132.5 (C); 129.0 (CH); 127.9 (CH); 127.8 (CH); 126.6 (CH); 126.5 (CH); 126.2 (CH); 124.7 (CH); 63.2 (CH); 52.0 (CH<sub>2</sub>); 23.6 (CH<sub>3</sub>); 16.1 (CH<sub>2</sub>); 13.6 (CH<sub>3</sub>).ESI-HRMS Calcd for (M+H<sup>+</sup>) C<sub>20</sub>H<sub>17</sub>N<sub>3</sub>O 282.16064; found 282.1601.

## References:

- (1) Hamasaka, G.; Uozumi, Y. *Chem. Commun.* **2014**, *50*, 14516.
- (2) Irfan, M.; Aneja, B.; Yadava, U.; Khan, S. I.; Manzoor, N.; Daniliuc, C. G.; Abid, M. *Eur. J. Med. Chem.* **2015**, *93*, 246.
- (3) Zhang, Q.; Takacs, J. M. *Org. Lett.* **2008**, *10*, 545.

## Figures and Tables.

### SMILES of compounds.

**Table S1.** SMILES of compounds tested.

| Paper ID | Smiles                                                        |
|----------|---------------------------------------------------------------|
| 5a       | <chem>OC1=CC=CC=C1OCC2=CN(CC3=CC=CC=C3)N=N2</chem>            |
| 5b       | <chem>OC1=CC=CC=C1OCC2=CN(CCCC3=CC=CC=C3)N=N2</chem>          |
| 5c       | <chem>OC1=CC=CC=C1OCC2=CN(C/C=C/C3=CC=CC=C3)N=N2</chem>       |
| 5d       | <chem>OC1=CC=CC=C1OCC2=CN(C3CCCCC3)N=N2</chem>                |
| 5e       | <chem>OC1=CC=CC=C1OCC2=CN(CCCCCCCC)N=N2</chem>                |
| 5f       | <chem>OC1=CC=CC=C1OCC2=CN(CCCCCCCCCCCC)N=N2</chem>            |
| 5gZ      | <chem>C/C(C)=C/CC/C(C)=C\CN1N=NC(COC2=CC=CC=C2O)=C1</chem>    |
| 5gE      | <chem>OC1=CC=CC=C1OCC2=CN(C/C=C(C)/CC/C=C(C)/C)N=N2</chem>    |
| 5h       | <chem>OC1=CC=CC=C1OCC2=CN(CC(OCC)=O)N=N2</chem>               |
| 5i       | <chem>OC1=CC=CC=C1OCC2=CN(CCCCC(OCC)=O)N=N2</chem>            |
| 6a       | <chem>COC1=CC=CC=C1OCC2=CN(CC3=CC=CC=C3)N=N2</chem>           |
| 6b       | <chem>COC1=CC=CC=C1OCC2=CN(CCCC3=CC=CC=C3)N=N2</chem>         |
| 6c       | <chem>COC1=CC=CC=C1OCC2=CN(C3CCCCC3)N=N2</chem>               |
| 6d       | <chem>CCCCCCC1C=C(COC2=CC=CC=C2OC)N=N1</chem>                 |
| 6e       | <chem>O=C(OCC)CN1C=C(COC2=CC=CC=C2OC)N=N1</chem>              |
| 9a       | <chem>OC1=C(CN2N=NC(CCC)=C2)C=CC=C1</chem>                    |
| 9b       | <chem>OC1=C(CN2N=NC(CCCCC)=C2)C=CC=C1</chem>                  |
| 9c       | <chem>OC1=C(CN2N=NC(CCCCCCCC)=C2)C=CC=C1</chem>               |
| 9d       | <chem>OC1=C(CN2N=NC(C3=CC=CC=C3)=C2)C=CC=C1</chem>            |
| 9e       | <chem>OC1=C(CN2N=NC(CCC3=CC=CC=C3)=C2)C=CC=C1</chem>          |
| 11a      | <chem>OCC1=C(CCCCC)N=NN1CC2=CC=CC=C2</chem>                   |
| 11b      | <chem>OCC1=C(C2=CC=CC=C2)N(N=N1)CC3=CC=CC=C3</chem>           |
| 11c      | <chem>OCC1=C(C2=CC=CC=C2)N(N=N1)CC3=CC=CC=C3</chem>           |
| 11d      | <chem>OC(C)C1=C(CC)N=NN1CC2=CC=CC=C2</chem>                   |
| 11e      | <chem>CC(O)C1=C(CC)N(N=N1)CC2=CC=CC=C2</chem>                 |
| 13a      | <chem>CCCCC1=C(N(N=N1)CCCC2=CC=CC=C2)CO</chem>                |
| 13b      | <chem>CCCCC(N(N=N1)CCCC2=CC=CC=C2)=C1CO</chem>                |
| 13c      | <chem>OCC(N(N=N1)CCCC2=CC=CC=C2)=C1C3=CC=CC=C3</chem>         |
| 13d      | <chem>OCC1=C(N(N=N1)CCCC2=CC=CC=C2)C3=CC=CC=C3</chem>         |
| 13e      | <chem>CC(C(N(N=N1)CCCC2=CC=CC=C2)=C1CC)O</chem>               |
| 13f      | <chem>CC(C1=C(N(N=N1)CCCC2=CC=CC=C2)CC)O</chem>               |
| 15a      | <chem>CCCCC1=C(CO)N(CC2=CC=C3C(C=CC=C3)=C2)N=N1</chem>        |
| 15b      | <chem>OCC1=C(CCCCC)N(CC2=CC=C3C(C=CC=C3)=C2)N=N1</chem>       |
| 15c      | <chem>OCC1=C(C2=CC=CC=C2)N=NN1CC3=CC=C4C(C=CC=C4)=C3</chem>   |
| 15d      | <chem>OCC1=C(C2=CC=CC=C2)N(CC3=CC=C4C(C=CC=C4)=C3)N=N1</chem> |
| 15e      | <chem>CC(C1=C(CC)N=NN1CC2=CC=C3C(C=CC=C3)=C2)O</chem>         |
| 15f      | <chem>CC(C1=C(CC)N(CC2=CC=C3C(C=CC=C3)=C2)N=N1)O</chem>       |

## Multisequence alignment of :enoyl-[acyl-carrier-protein] reductases.

>CBZ37546.1 enoyl-[acyl-carrier-protein] reductase, putative [*Leishmania donovani*]  
MQANRVTSLFGVQYPIVQGGMVWCSGWRLASAVSNAGGLGLVGAGSMSFDVFQHHVRRCKEAAKKPFGVN  
VPLSRDMAQYMDFIIEEKVPIVFTSAGSPKLWTQKLQSHGIKVVHVVPSCKLALKCEAAGVNAVVAEGFEAGGH  
NGLEEITTMALVPQVRKALAPEVPLLAAGGIASGEAMLAAAMALGAEGVQVGTRFAVTQESSAAEEFKKRCTAA  
GEGDTYLTLKQYMPTRVMLNDYGKEARRLSESGATKAQLKEFRGKGRTRKKG MFDGDVTNGELEIGQIVSACKD  
VPTAAEVVERMVKEFRTRNAQLAKMNL

>CAC5433624.1 enoyl-[acyl-carrier-protein]\_reductase\_putative | GeneDB:LmjF.34.0610  
[*Leishmania donovani*]  
MQANRVTSLFGVQYPIVQGGMVWCSGWRLASAVSNAGGLGLVGAGSMSFDVFQHHVRRCKEAAKKPFGVN  
VPLSRDMAQYMDFIIEEKVPIVFTSAGSPKLWTQKLQSHGIKVVHVVPSCKLALKCEAAGVNAVVAEGFEAGGH  
NGLEEITTMALVPQVRKALAPEVPLLAAGGIASGEAMLAAAMALGAEGVQVGTRFAVTQESSAAEEFKKRCTAAG  
EGDTYLTLKQYMPTRVMLNDYGKEARRLSESGATKAQLKEFRGKGRTRKKG MFDGDVTNGELEIGQIVSACKDV  
PTAAEVVERMVKEFRTRNAQLAKMNL

>XP\_001686152.1 putative enoyl-[acyl-carrier-protein] reductase [*Leishmania major* strain Friedlin]  
MQANRVTSLFGVQYPIVQGGMVWCSGWRLASAVSNAGGLGLVGAGSMNFDIFQHHVRRCKEASKKPFQVN  
VPLSRDMAQYMDFIIEEKVPIVFTSAGSPKLWTQKLQSHGIKVVHVVPSCKLALKCEAAGVNAVVAEGFEAGGH  
NGLEEITTMALIPQVRKALAPEIPLLAAGGIASGEAMLATMALGAEGVQVGTRFAVTQESSAAEEFKKRCTAAGE  
GDTYLTLKQYMPTRVMLNDYGKEARRLSESGATKAQLEEFRGKGRTRKKGIFDGDVTNGELEIGQIVSACKDVPT  
AAEVVERMVKEFHTRKAQLAKMNL

>XP\_001468450.1 putative enoyl-[acyl-carrier-protein] reductase [*Leishmania infantum* JPCM5]  
MQANRVTSLFGVQYPIVQGGMVWCSGWRLASAVSNAGGLGLVGAGSMSFDVFQHHVRRCKEAAKKPFGVN  
VPLSRDMAQYMDFIIEEKVPIVFTSAGSPKLWTQKLQSHGIKVVHVVPSCKLALKCEAAGVNAVVAEGFEAGGH  
NGLEEITTMALVPQVRKALAPEVPLLAAGGIASGEAMLAAAMALGAEGVQVGTRFAVTQESSAAEEFKKRCTAA  
GEGDTYLTLKQYMPTRVMLNDYGKEARRLSESGATKAQLKEFRGKGRTRKKG MFDGDVTNGELEIGQIVSACKD  
VPTAAEVVERMVKEFRTRNAQLAKMNL

>sp|P0AEK4|FABI\_ECOLI Enoyl-[acyl-carrier-protein] reductase [NADH] FabI OS=*Escherichia coli*  
(strain K12) OX=83333 GN=fabI PE=1 SV=2  
MGFLSGKRILVTGVASKLSIAYGIAQAMHREGAELAFYQNDKLGKRVVEFAAQLGSDIVLQCDVAEDASIDTMF  
AELGKVVWPKFDGDFVHSIGFAPGDQLDGDYVNAVTRREGFKIAHDISSYSFVAMAKACRSMLNPGSALLTSLYGLA  
ERAIPNPNVMGLAKASLEANVRYMANAMGPEGVRVNAISAGPIRTLAASGIKDFRKMLAHCEAVTPIRRTVTIE  
DVGNSAAFLCSDLSAGISGEVVHVDGGFSIAAMNELELK

>sp|P9WGR1|INHA\_MYCTU Enoyl-[acyl-carrier-protein] reductase [NADH] OS=*Mycobacterium tuberculosis*  
(strain ATCC 25618 / H37Rv) OX=83332 GN=inhA PE=1 SV=1  
MTGLLDGKRILVSGIITDSSIAFHARVAQEQAQLVLTGFDRRLRIQRITDRLPKAPLLELDVQNEEHLASLAGR  
VTEAIGAGNKLDGTVHSIGFMPQTMGINPFFDAPYADVSKGIHISAYSYSMAKALLPIMNPGGSIVGMDFD  
PSRAMPAYNWMTVAKSALSVNRFVAREAGKYGVRNVAAGPIRTLAMSAIVGGALGEEAGAQQIQLLEEGW  
DQRAPIGWNMKDATPVAKTVCALLSDWLPATTGDIYADGGAHTQLL

CLUSTAL 2.1 multiple sequence alignment

```

CAC5433624.1      MQANRVTSLFGVQYPIVQGGMVWCSGWRLASAVSNAGGLGLVGAGSMSFD-VFQHHVRR 59
XP_001468450.1   MQANRVTSLFGVQYPIVQGGMVWCSGWRLASAVSNAGGLGLVGAGSMSFD-VFQHHVRR 59
CBZ37546.1       MQANRVTSLFGVQYPIVQGGMVWCSGWRLASAVSNAGGLGLVGAGSMSFD-VFQHHVRR 59
XP_001686152.1   MQANRVTSLFGVQYPIVQGGMVWCSGWRLASAVSNAGGLGLVGAGSMNFD-IFQHHVRR 59
sp|P0AEK4|FABI_ECOLI  -----MGFLSGKRILVTVGASKLSIAYGIAQAMHREG-----AELAFT-YQNDKLGK 47
sp|P9WGR1|INHA_MYCTU  ----MTGLLDGKRILVSGIITDSSIAFHARVAQEQG-----AQLVLTFDRLRLIQR 49
                  * * : : . . : * . . * . . : : . . :

CAC5433624.1      KEAAKKPFQVNVPLSRDMAQYMDFIIEEKVPIVFTSAGSPKLWTQKLSHGKIKVHVWPS 119
XP_001468450.1   KEAAKKPFQVNVPLSRDMAQYMDFIIEEKVPIVFTSAGSPKLWTQKLSHGKIKVHVWPS 119
CBZ37546.1       KEAAKKPFQVNVPLSRDMAQYMDFIIEEKVPIVFTSAGSPKLWTQKLSHGKIKVHVWPS 119
XP_001686152.1   KEASKKPFQVNVPLSRDMAQYMDFIIEEKVPIVFTSAGSPKLWTQKLSHGKIKVHVWPS 119
sp|P0AEK4|FABI_ECOLI  VEEFAAQLGSDIVLQCDVAE-----DASIDTMFAELG--KWWPKFDG-----FVHSIG- 93
sp|P9WGR1|INHA_MYCTU  ITDRLPAKAPLLELDVQNEE----HLASLAGRVTEAIG---AGNKLDG-----VHSIGF 97
                  . : * . : : : : * : : . ** :

CAC5433624.1      CKLALKCEAAGVNAVVAEGFEAGGHNGLEEITTMALVPQVRKALAPEVPLLAAGGIASGE 179
XP_001468450.1   CKLALKCEAAGVNAVVAEGFEAGGHNGLEEITTMALVPQVRKALAPEVPLLAAGGIASGE 179
CBZ37546.1       CKLALKCEAAGVNAVVAEGFEAGGHNGLEEITTMALVPQVRKALAPEVPLLAAGGIASGE 179
XP_001686152.1   CKLALKCEAAGVNAVVAEGFEAGGHNGLEEITTMALIPQVRKALAPEIPLLAAGGIASGE 179
sp|P0AEK4|FABI_ECOLI  FAPGDQLDGDYVNAVTRREGFKIA--HDISSYSFVAMAKACRSMLNPGSALLTSLYGAER 151
sp|P9WGR1|INHA_MYCTU  MPQTGMGINPFADAPYAD--VSKGIHISAYSYSMAKALLPIMNPGGSIVGMD--FDPSR 153
                  . : * : . . : : : : * . . : . . .

CAC5433624.1      AMLAAMALGAEGVQVGRFAVTVQESSAAEE-KKRCTAAGEGDTYLTQKQYMPTRVMLNDY 238
XP_001468450.1   AMLAAMALGAEGVQVGRFAVTVQESSAAEEFKKRCTAAGEGDTYLTQKQYMPTRVMLNDY 239
CBZ37546.1       AMLAAMALGAEGVQVGRFAVTVQESSAAEEFKKRCTAAGEGDTYLTQKQYMPTRVMLNDY 239
XP_001686152.1   AMLATMALGAEGVQVGRFAVTVQESSAAEEFKKRCTAAGEGDTYLTQKQSMPTRVMLNDY 239
sp|P0AEK4|FABI_ECOLI  AIPNYNVMGLAKASLEANVRYMANAMGPEGVRVNAISAG-----PIRTLAASG 199
sp|P9WGR1|INHA_MYCTU  AMPAYNWMTVAKSALSVNRFVAREAGKYGVRVNLVAAG-----PIRTLAMSA 201
*: : : : . . : . : ** * * : .

CAC5433624.1      GKEARRLSESGATKAQLKEFRGKGRKTKKGMFDGVDVTNGELEIGQIVSACKDVPTAAEVE 298
XP_001468450.1   GKEARRLSESGATKAQLKEFRGKGRKTKKGMFDGVDVTNGELEIGQIVSACKDVPTAAEVE 299
CBZ37546.1       GKEARRLSESGATKAQLKEFRGKGRKTKKGMFDGVDVTNGELEIGQIVSACKDVPTAAEVE 299
XP_001686152.1   GKEARRLSESGATKAQLEEFRGKGRKTKGIFDGDVTNGELEIGQIVSACKDVPTAAEVE 299
sp|P0AEK4|FABI_ECOLI  IKDFRKMALAHCEAVTPIRRVTIIEVDGN--SAAF LCSDSL SAG- ISGEVHVDGGFSIAA 255
sp|P9WGR1|INHA_MYCTU  IVGGALGEEAGAQLLLEEGWDRAPIGWNMKDATPVAKTVCALLSDWLPATTGDIYAD 261
                  : . . . . . . . . . .

CAC5433624.1      RMVKEFRTRNAQLAKMNL 316
XP_001468450.1   RMVKEFRTRNAQLAKMNL 317
CBZ37546.1       RMVKEFRTRNAQLAKMNL 317
XP_001686152.1   RMVKEFHTRKAQLAKMNL 317
sp|P0AEK4|FABI_ECOLI  MNELELK----- 262
sp|P9WGR1|INHA_MYCTU  GGAHTQLL----- 269

```

Figure S1. Multisequence alignment of :enoyl-[acyl-carrier-protein] reductases.



## Physicochemical parameters of active compounds.

The physicochemical parameters were calculated using the free software Data Warrior.

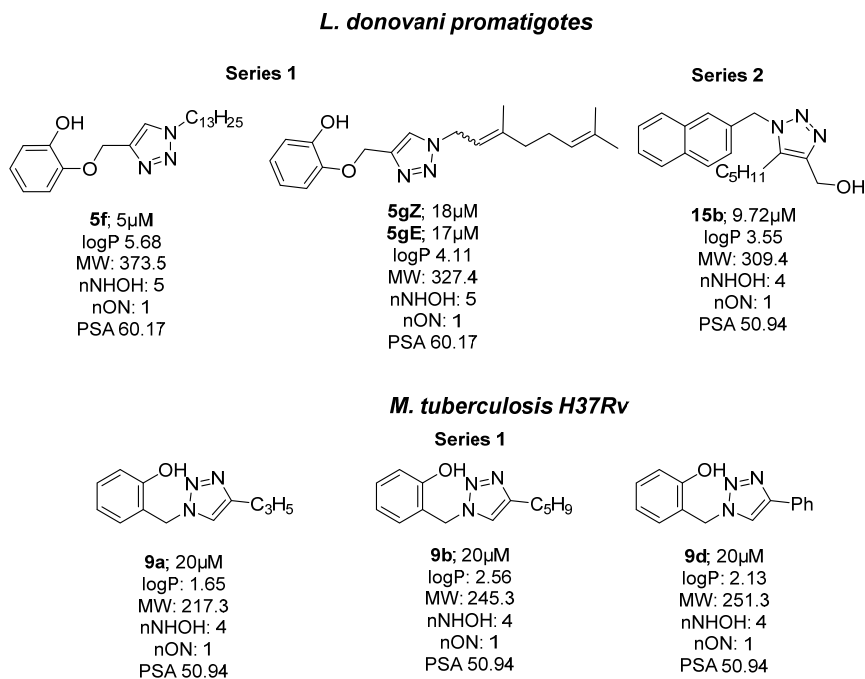

**Figure S2.** Physicochemical parameters of the active compounds of the library.

## Spectral Data of compounds.

### Compound 5a

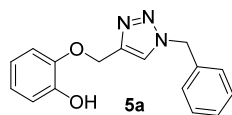

### <sup>1</sup>H NMR (300 MHz, CDCl<sub>3</sub>)

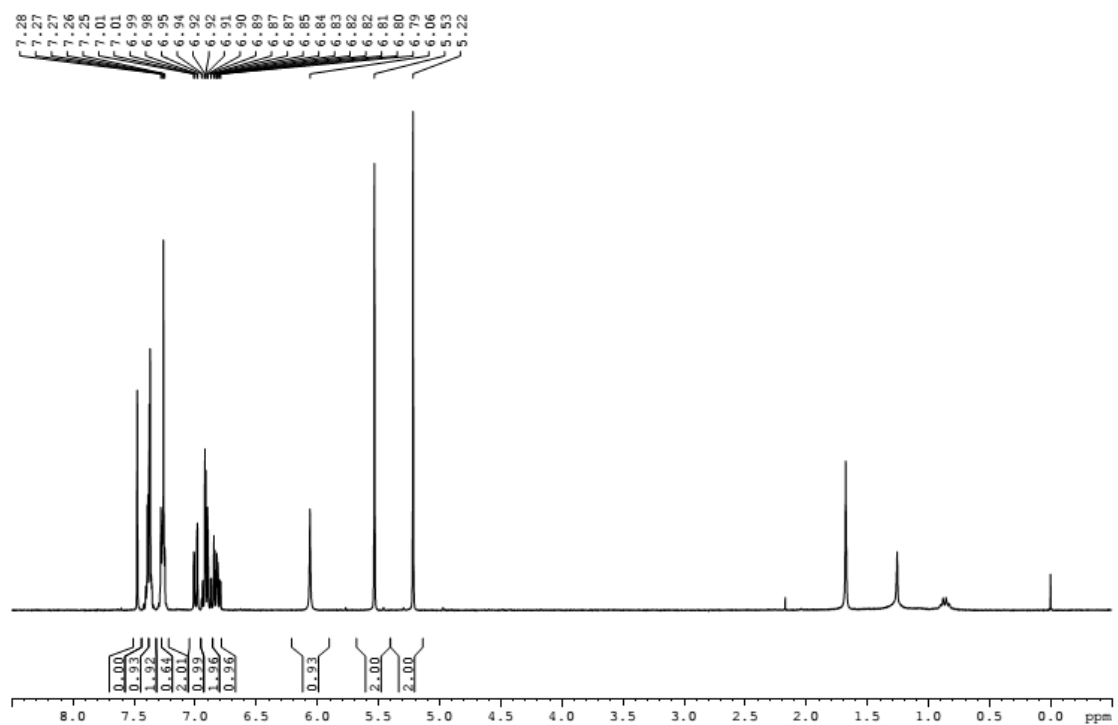

<sup>13</sup>C NMR (75 MHz, CDCl<sub>3</sub>)

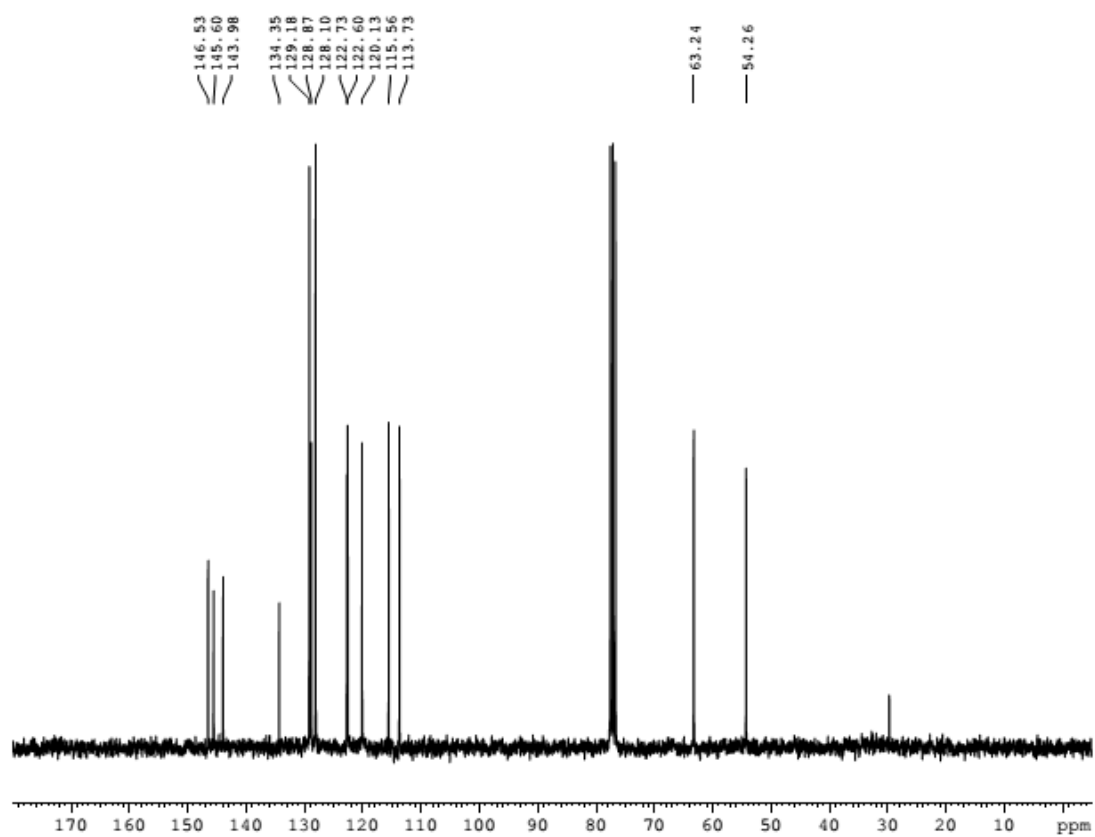

# HSQC

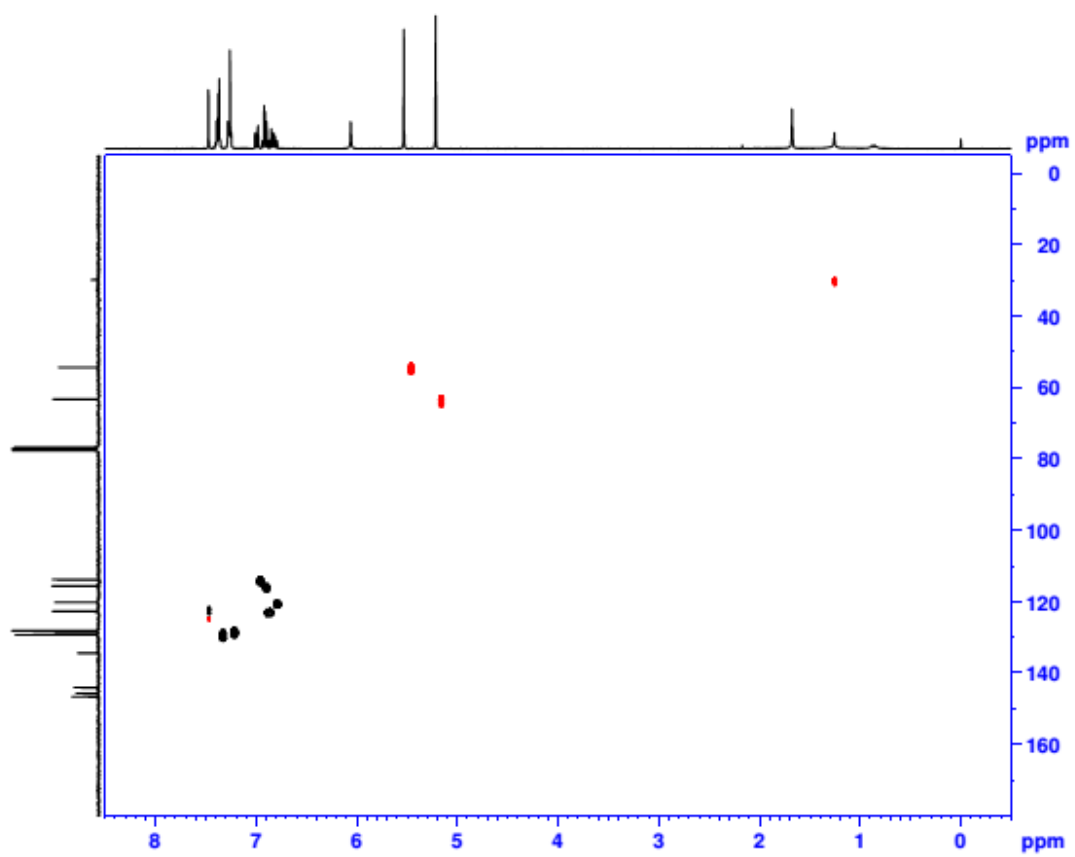

## Compound 5b

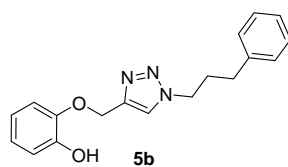

## <sup>1</sup>H NMR (300 MHz, CDCl<sub>3</sub>)

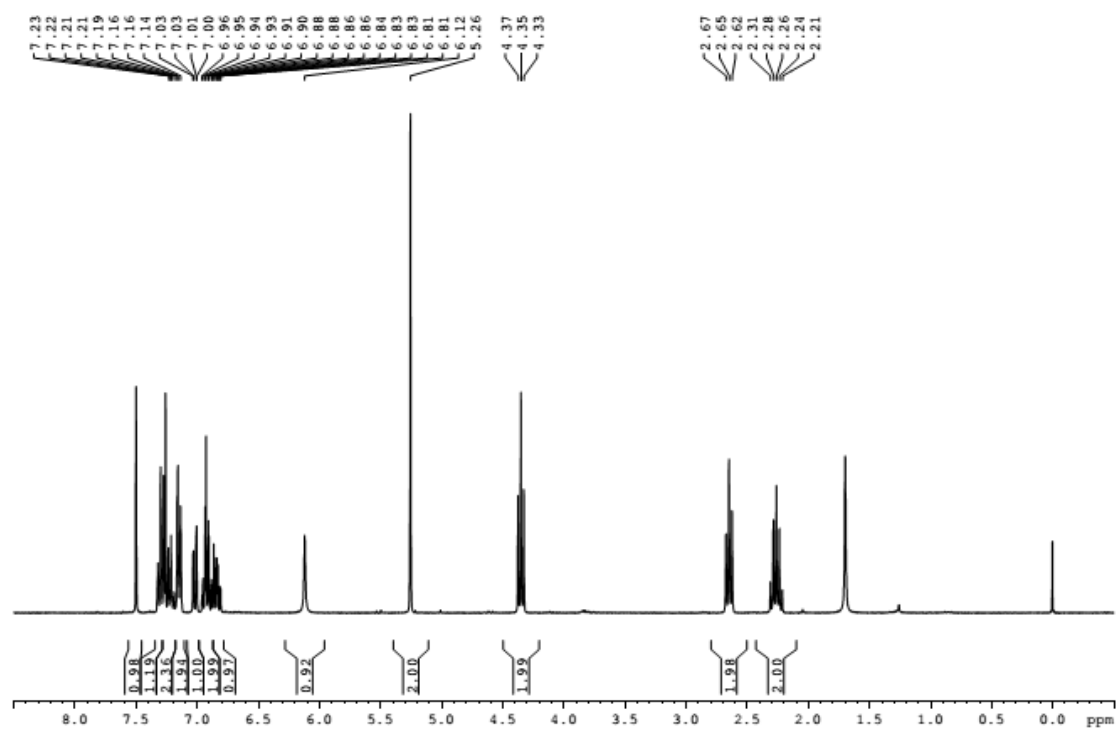

$^{13}\text{C}$  NMR (75 MHz,  $\text{CDCl}_3$ )

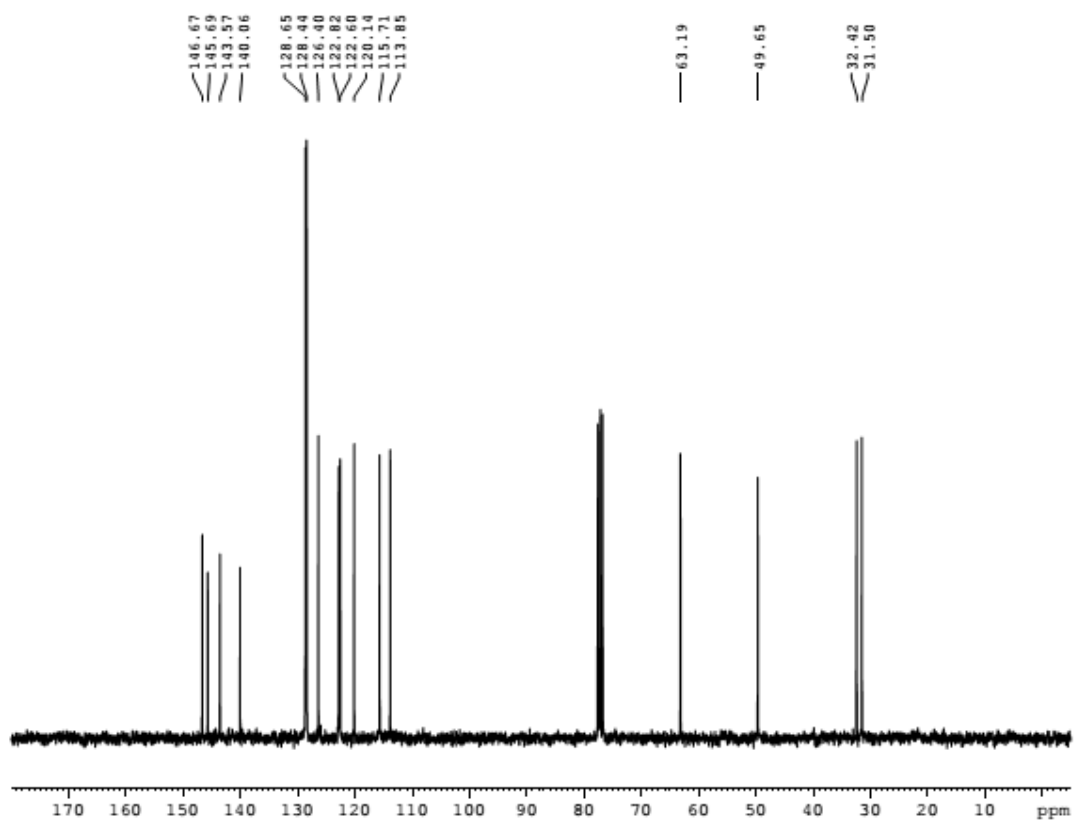

# HSQC

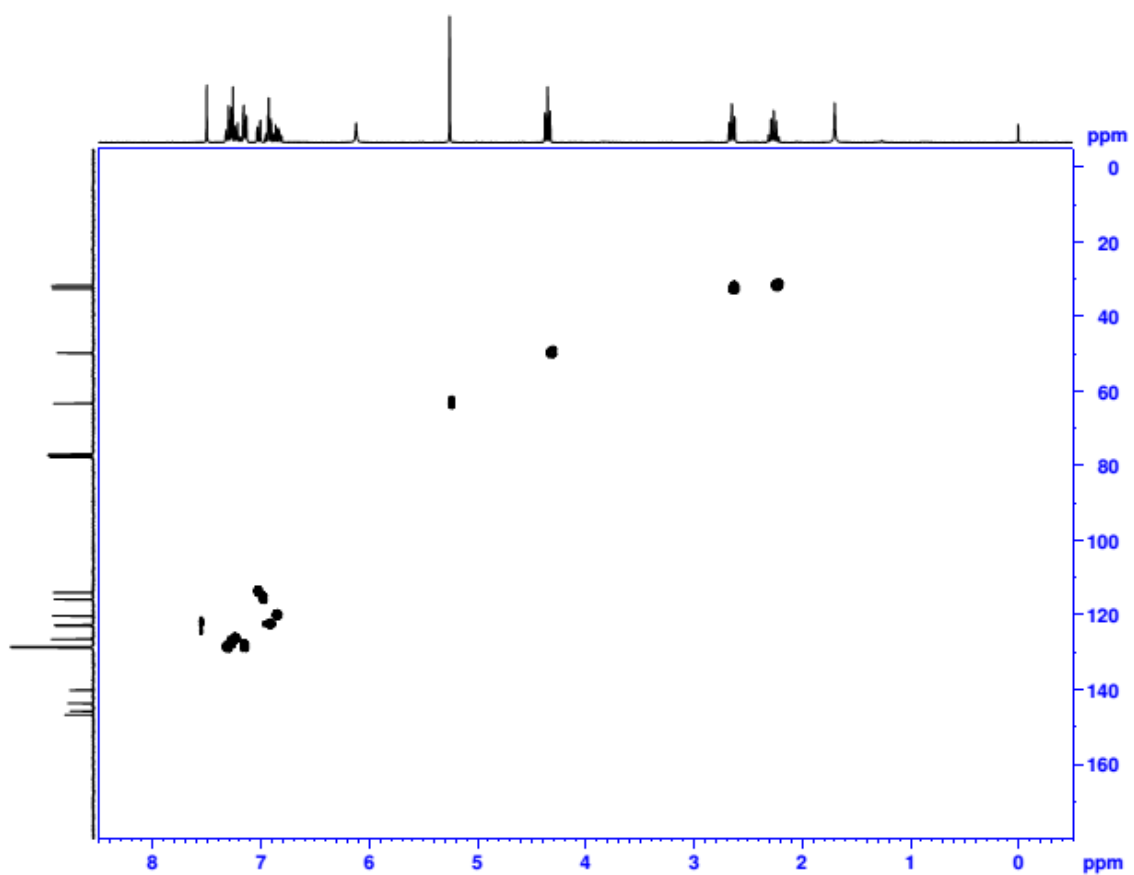

## Compound 5c

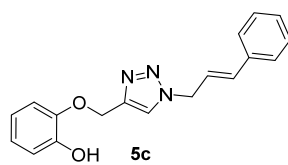

### <sup>1</sup>H NMR (300 MHz, CDCl<sub>3</sub>)

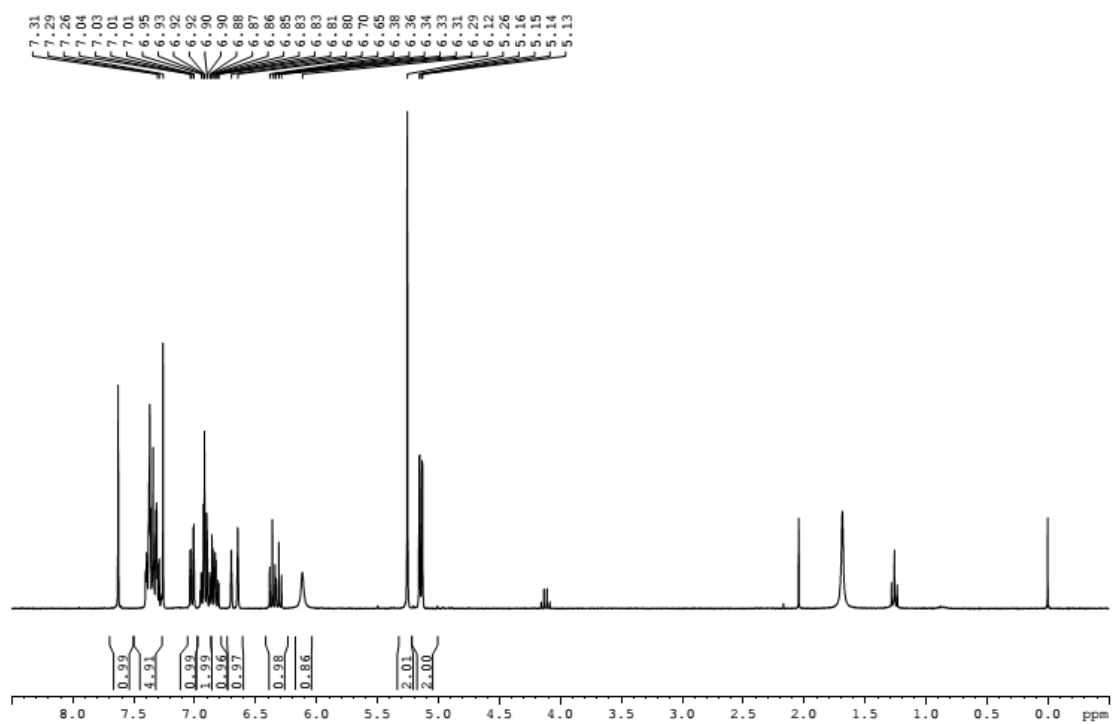



$^{13}\text{C}$  NMR (75 MHz,  $\text{CDCl}_3$ )

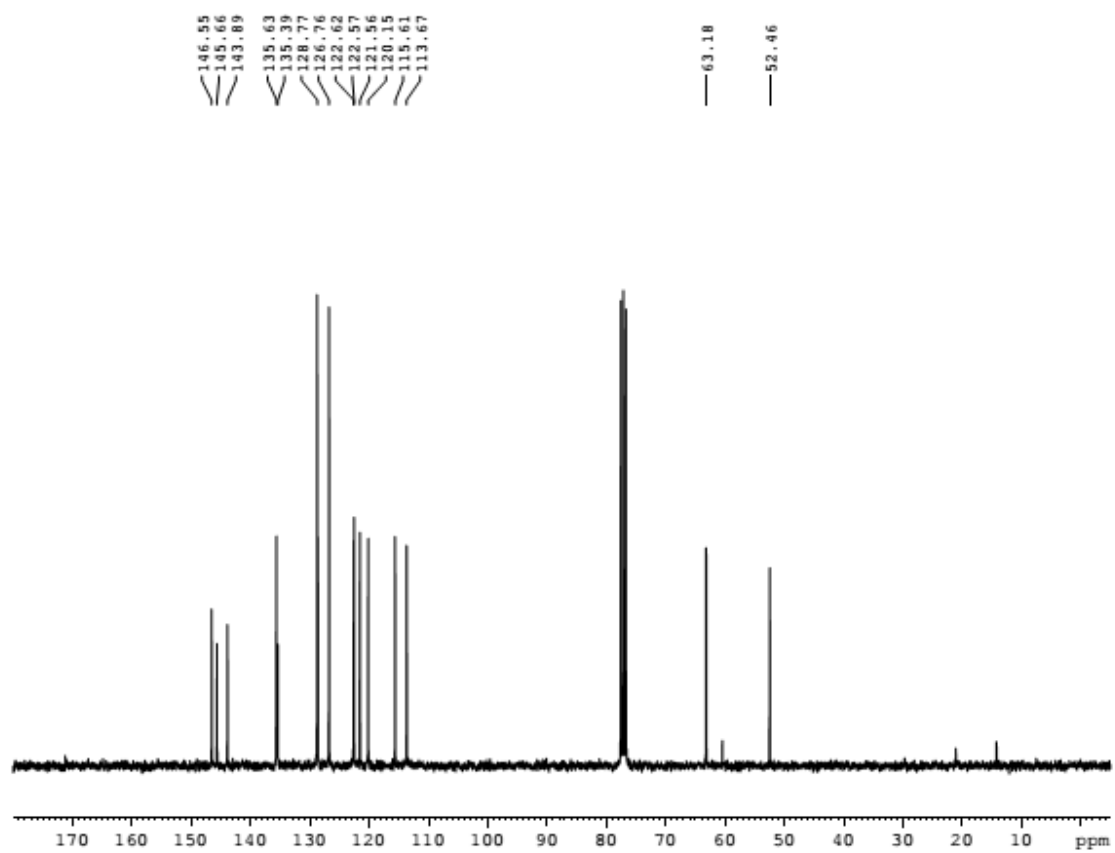

# HSQC

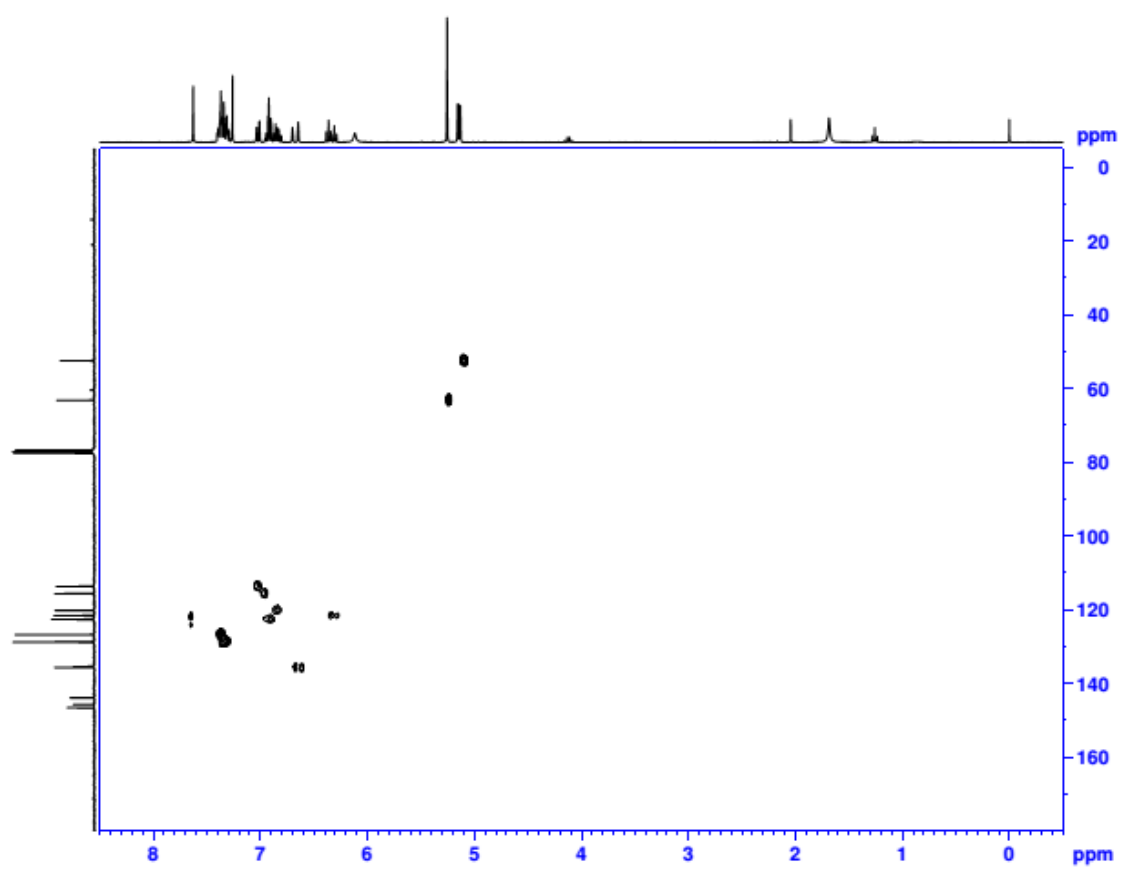

# Compound 5d

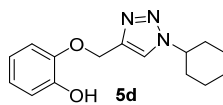

## <sup>1</sup>H NMR (300 MHz, CDCl<sub>3</sub>)

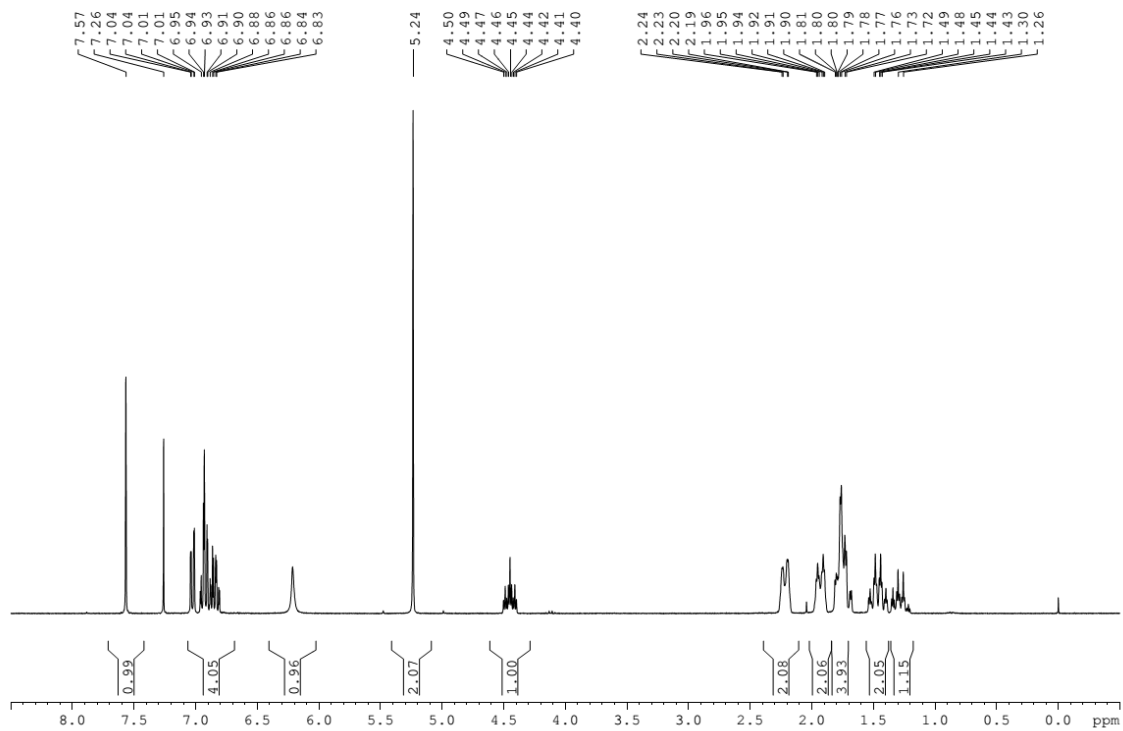

$^{13}\text{C}$  NMR (75 MHz,  $\text{CDCl}_3$ )

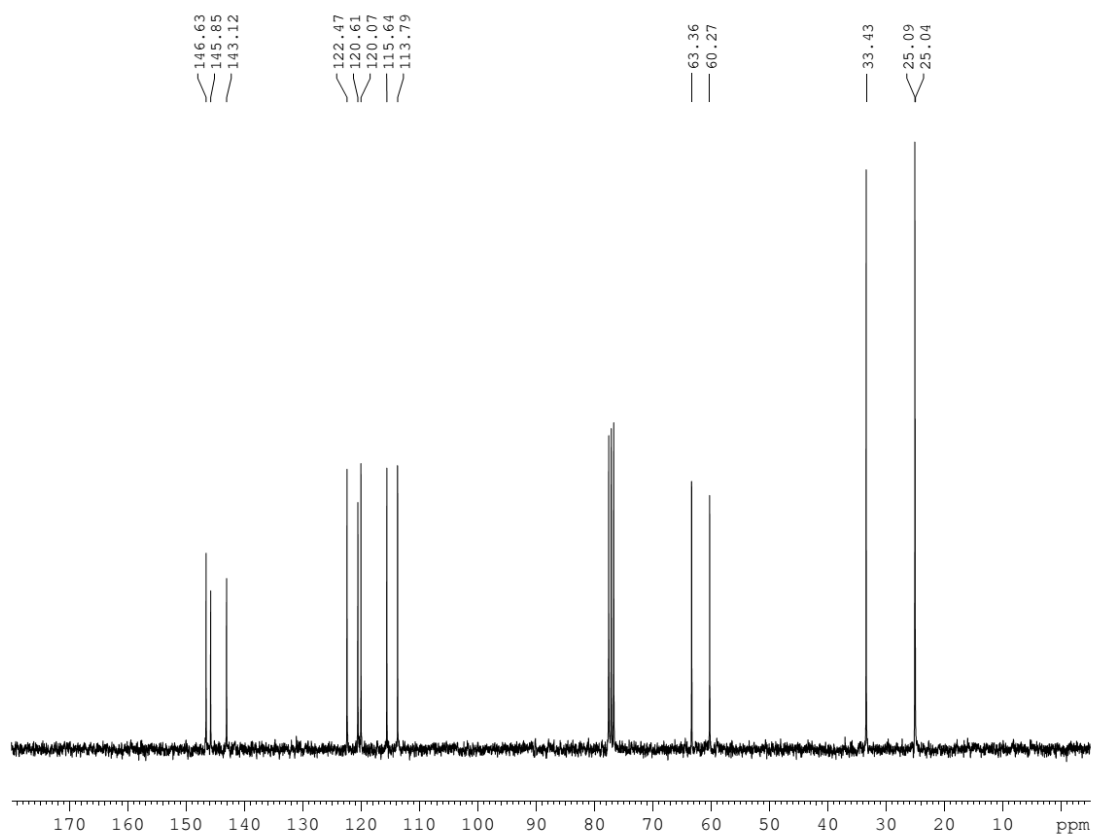

# HSQC

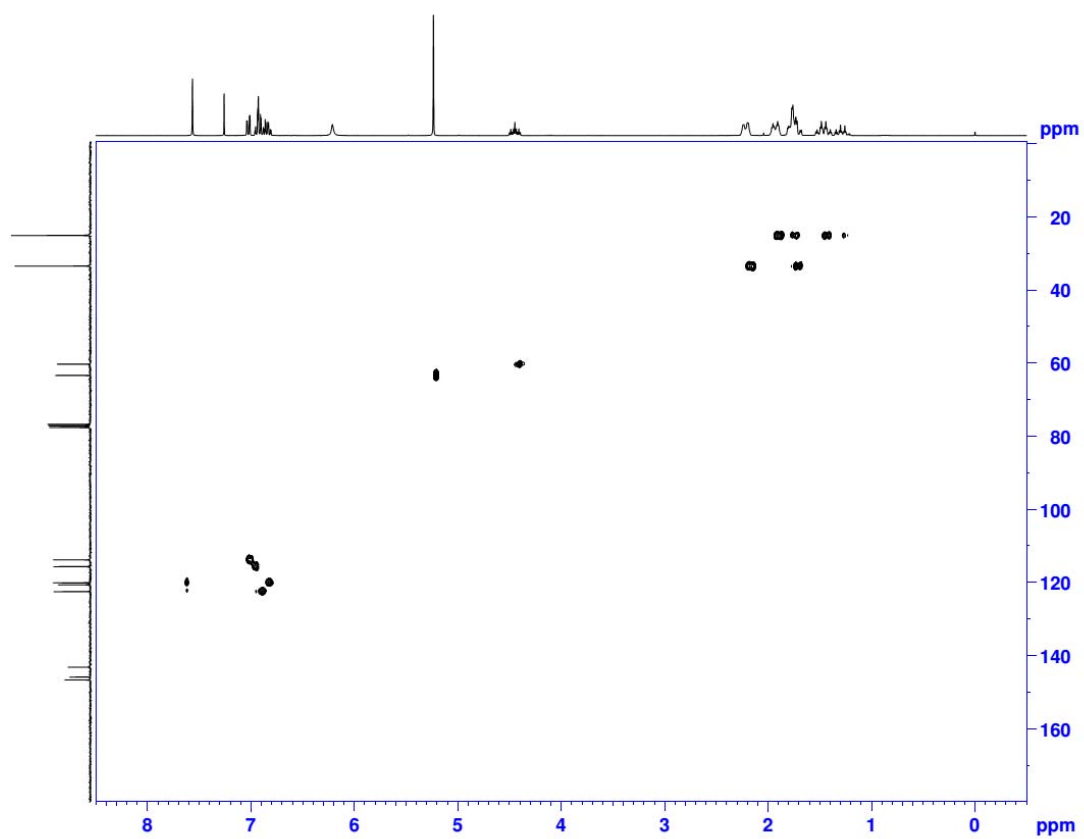

## Compound 5e

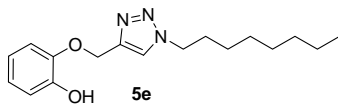

$^1\text{H}$  NMR (300 MHz,  $\text{CDCl}_3$ )

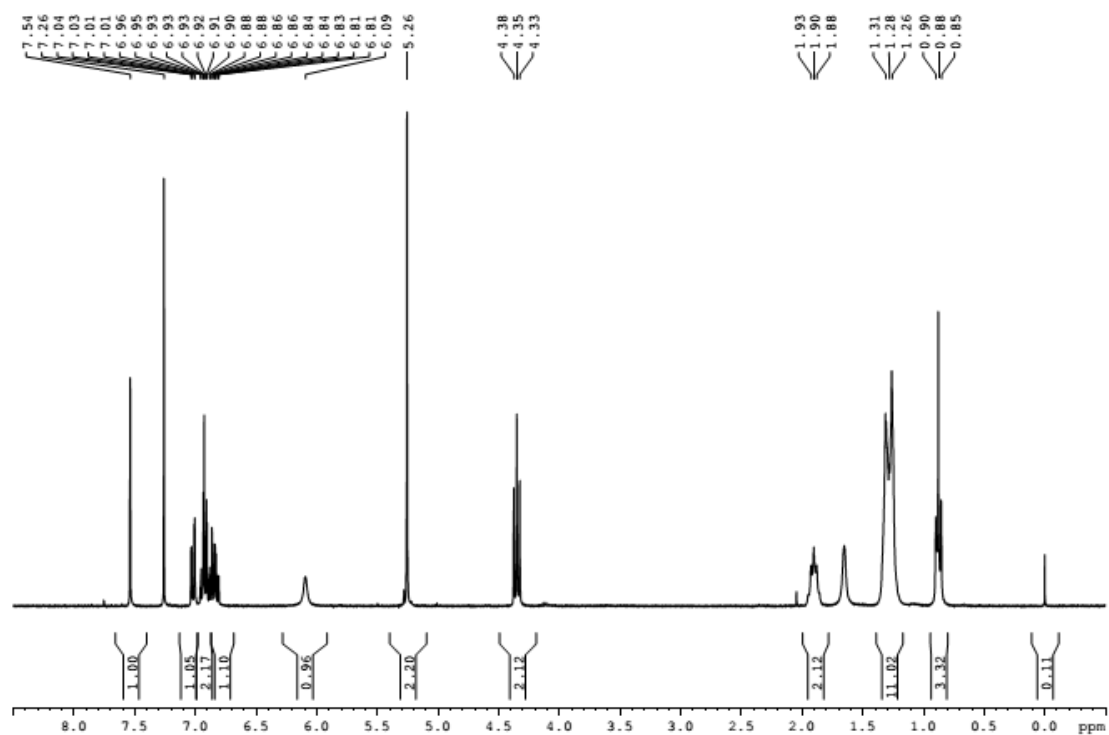

$^{13}\text{C}$  NMR (75 MHz,  $\text{CDCl}_3$ )

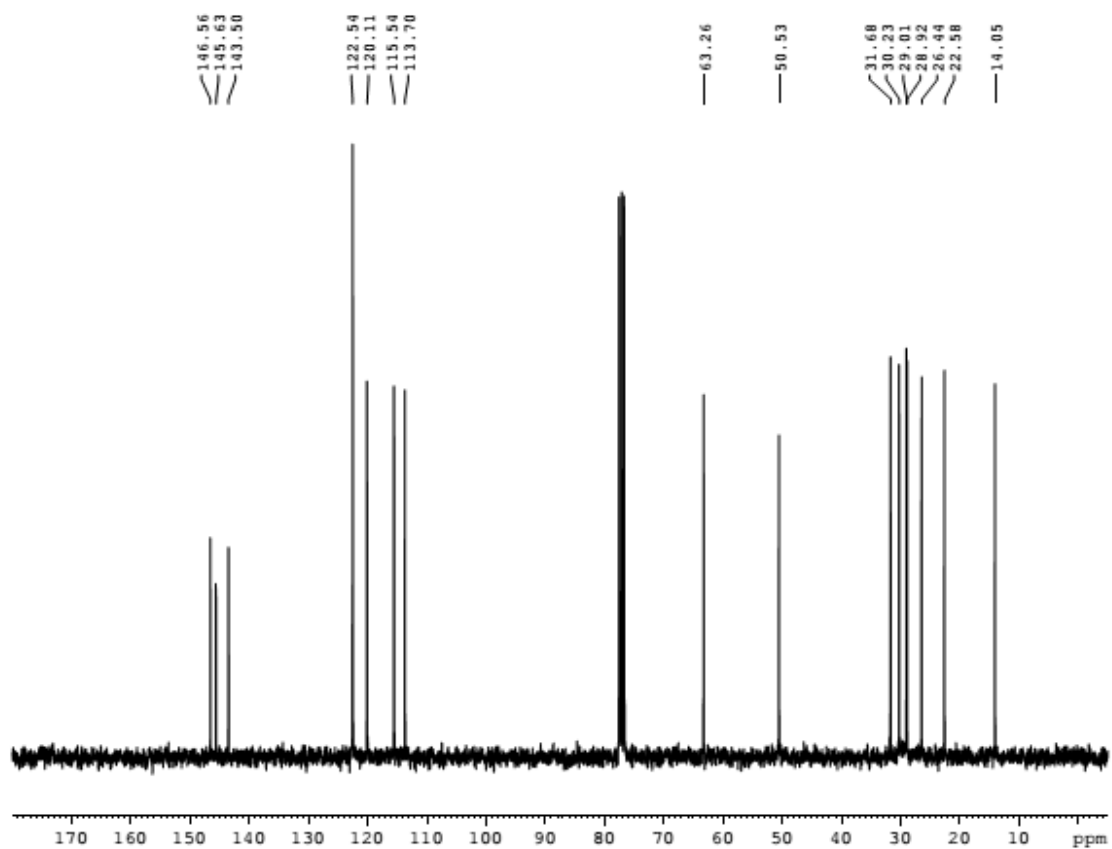

HSQC

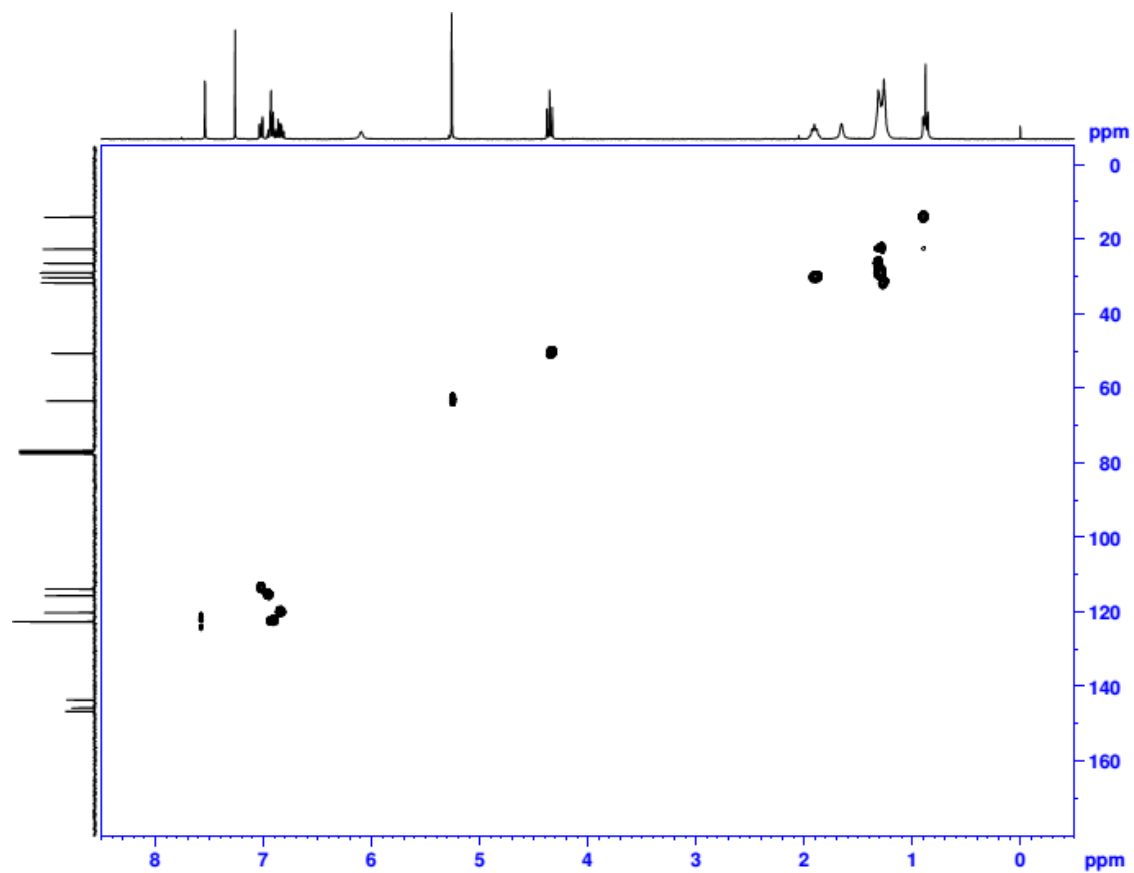



## Compound 5f

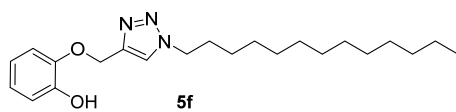

<sup>1</sup>H NMR (300 MHz, CDCl<sub>3</sub>)

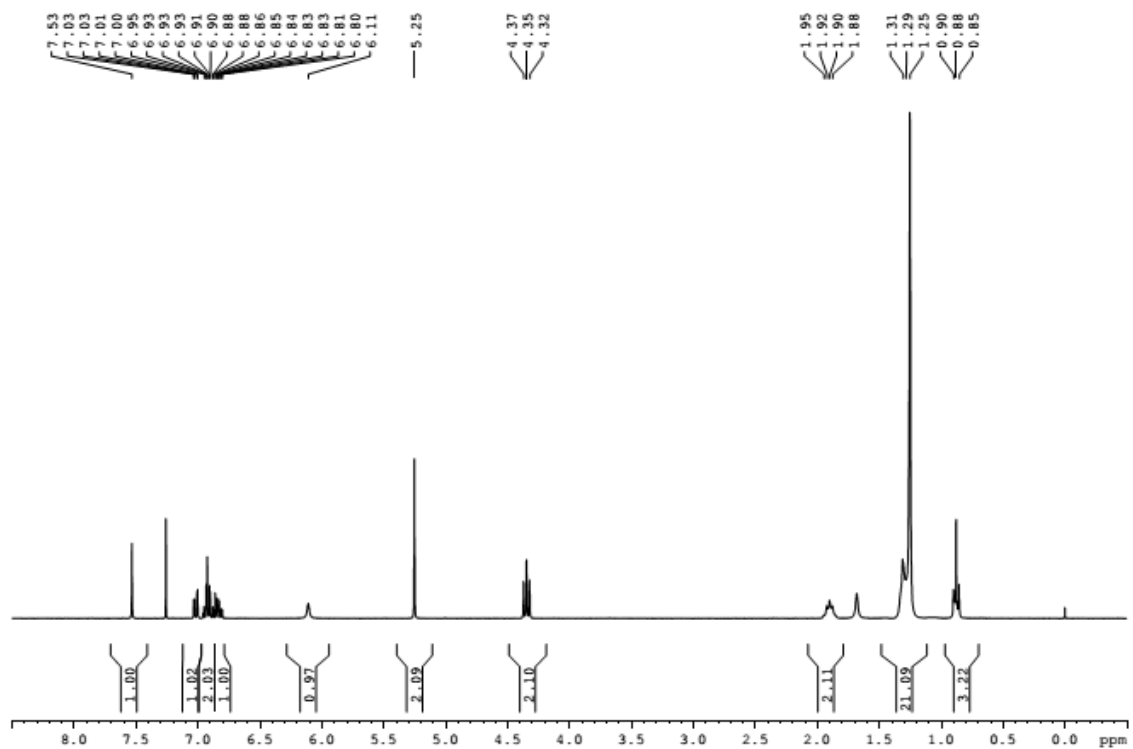

$^{13}\text{C}$  NMR (75 MHz,  $\text{CDCl}_3$ )

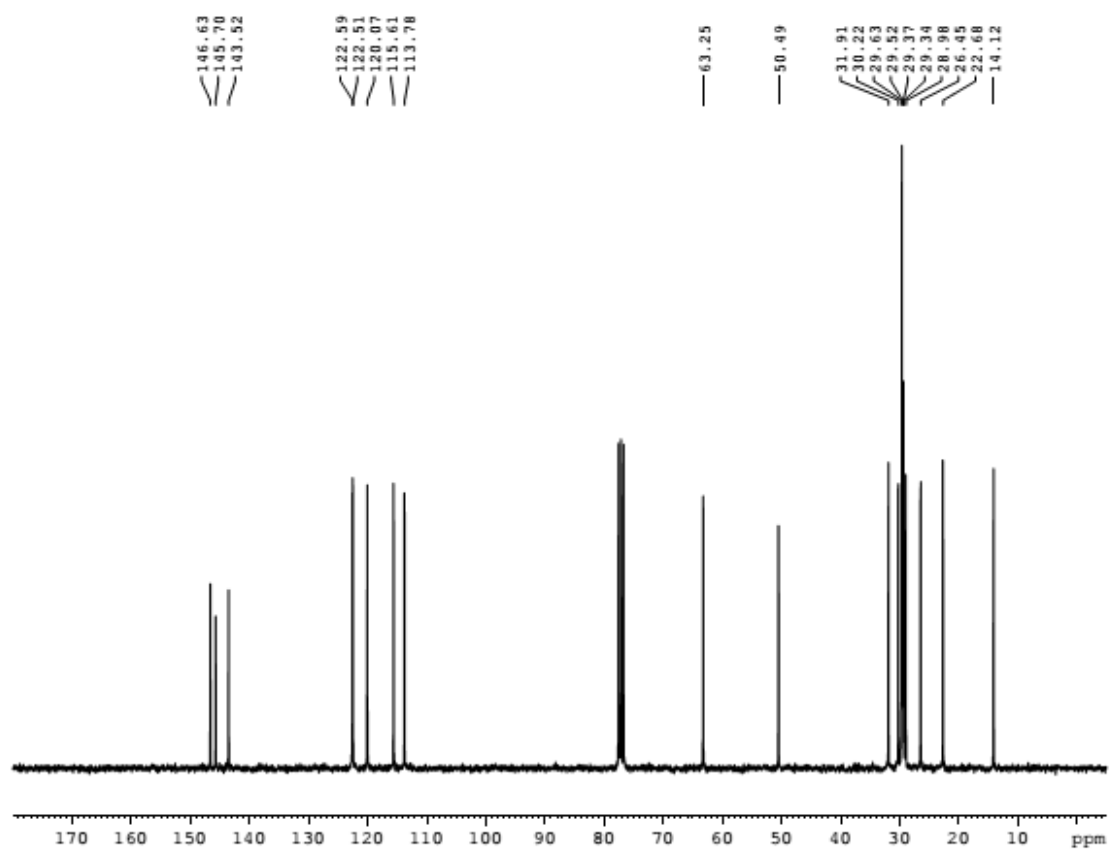

# HSQC

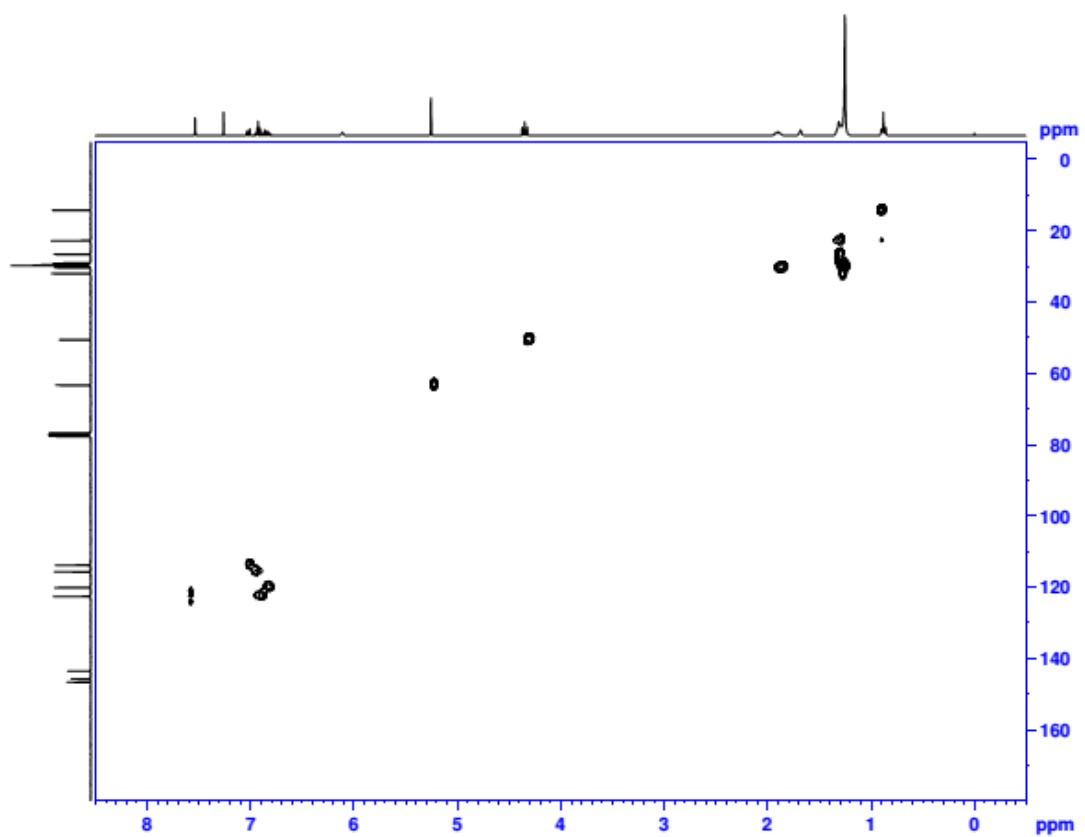

# Compound 5gZ

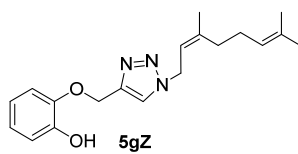

<sup>1</sup>H NMR (300 MHz, CDCl<sub>3</sub>)

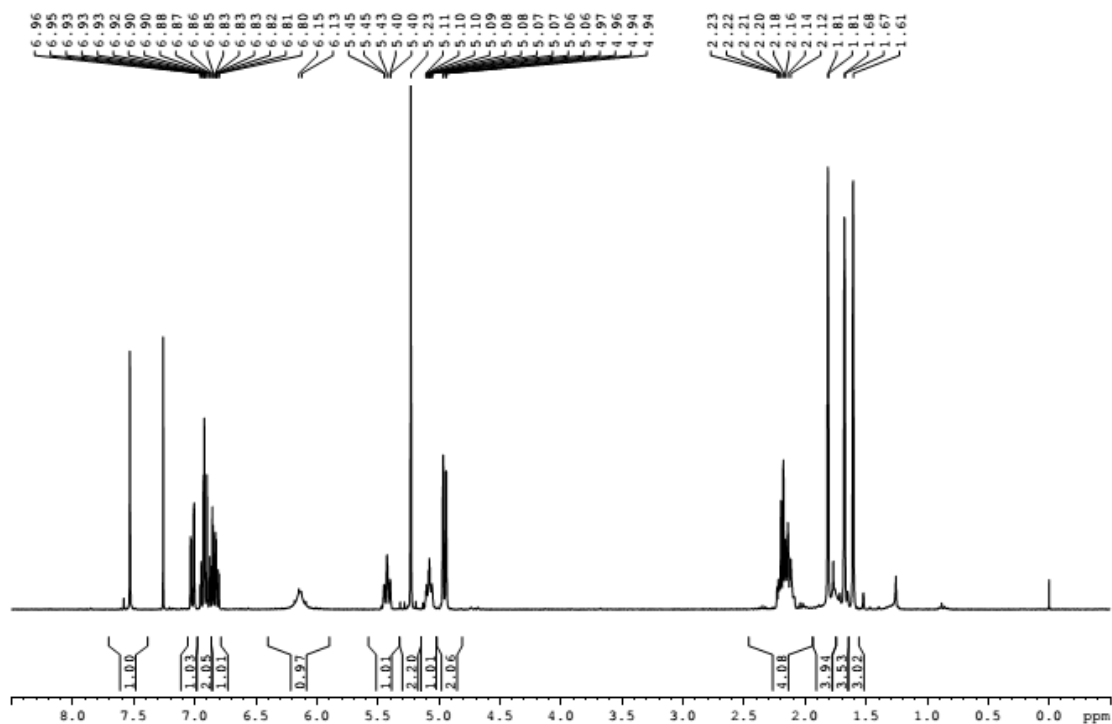

$^{13}\text{C}$  NMR (75 MHz,  $\text{CDCl}_3$ )

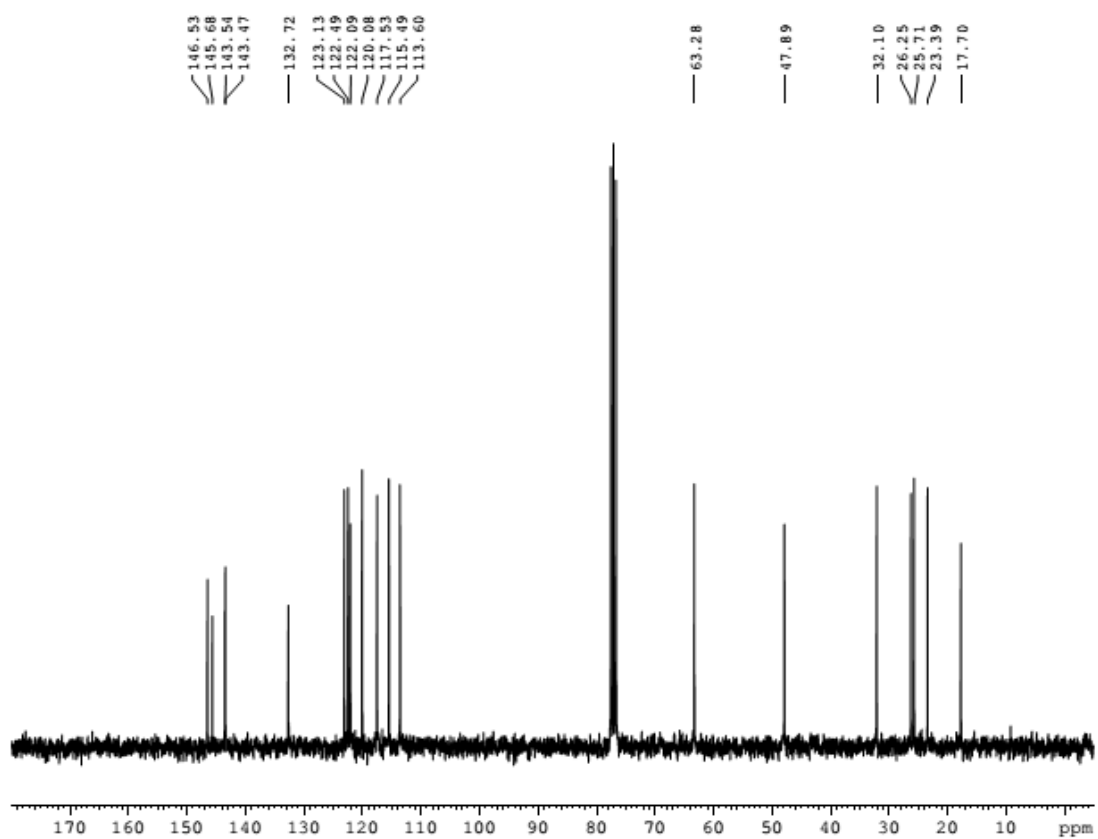

HSQC

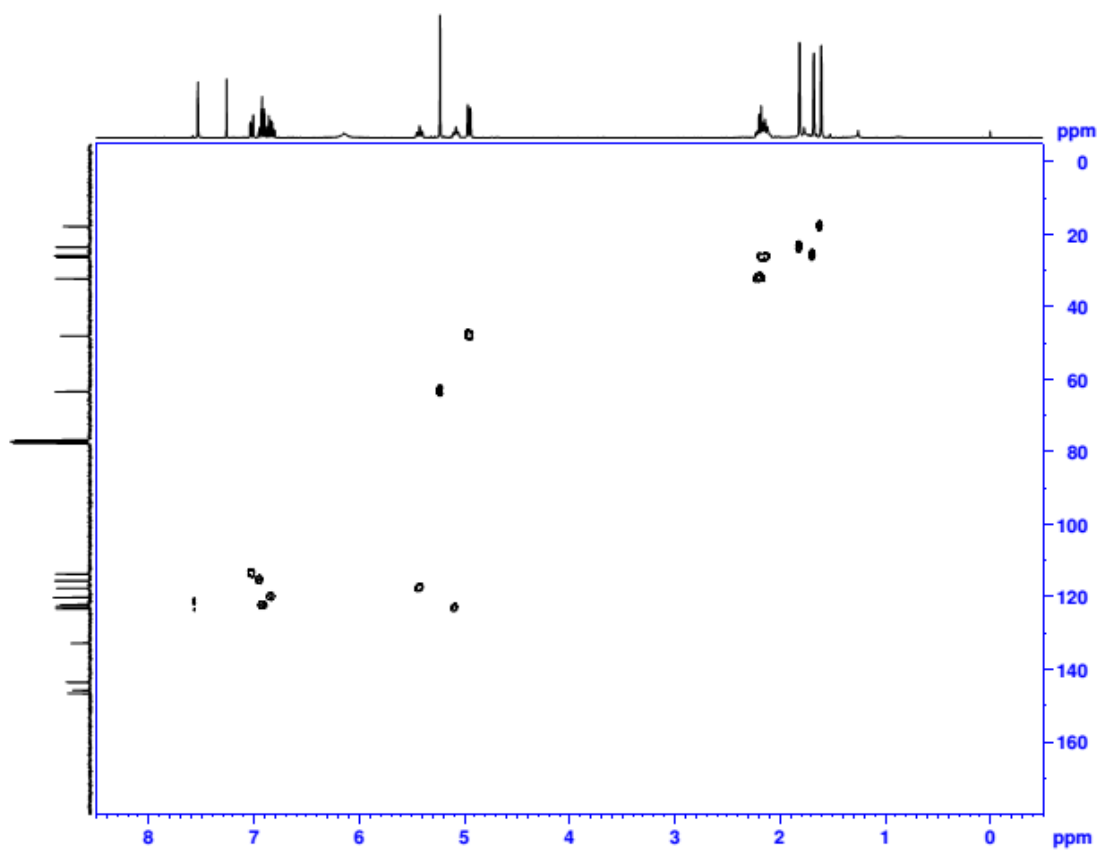

# Compound 5gE

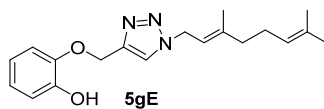

## <sup>1</sup>H NMR (300 MHz, CDCl<sub>3</sub>)

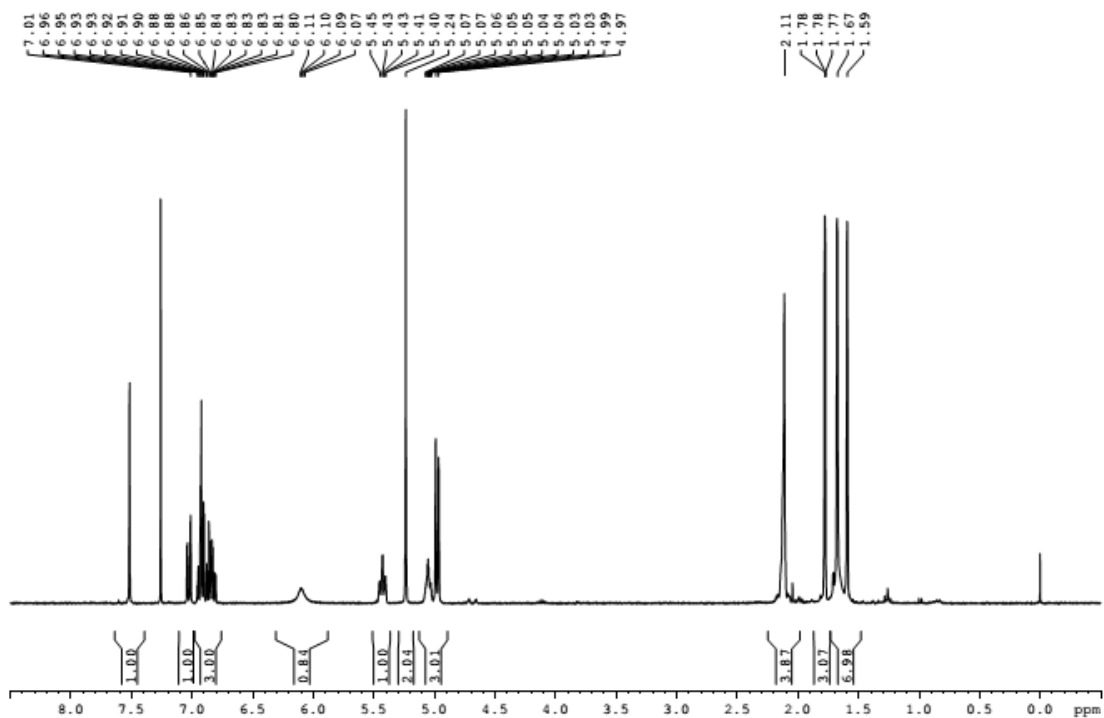

$^{13}\text{C}$  NMR (75 MHz,  $\text{CDCl}_3$ )

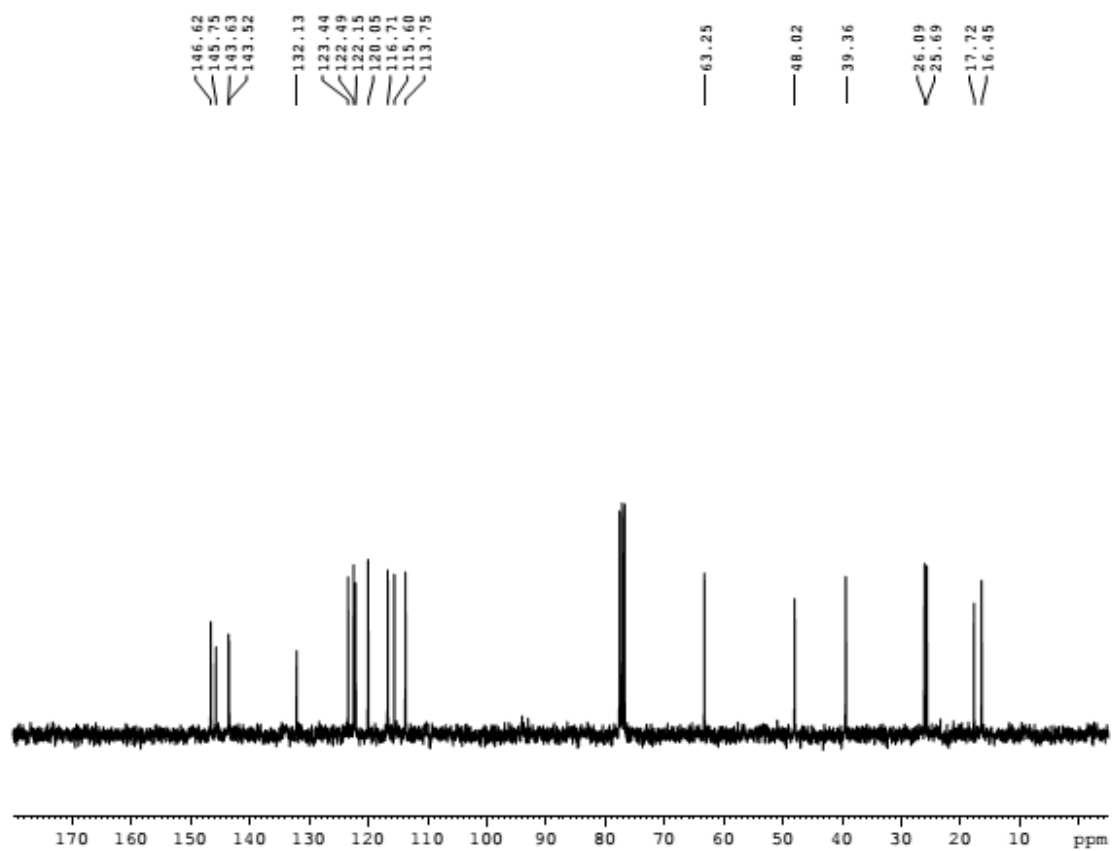



HSQC

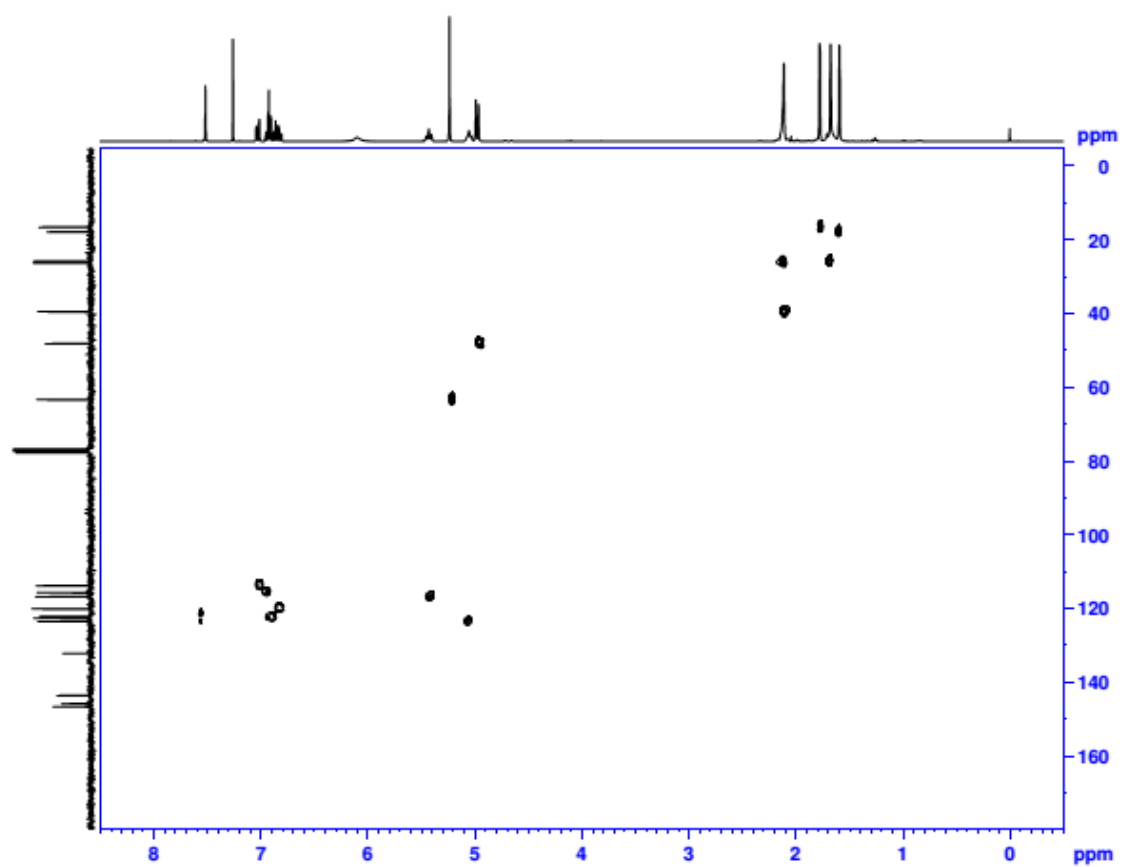

## Compound 5h

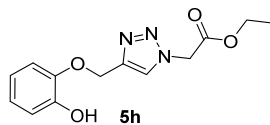

<sup>1</sup>H NMR (300 MHz, CDCl<sub>3</sub>)

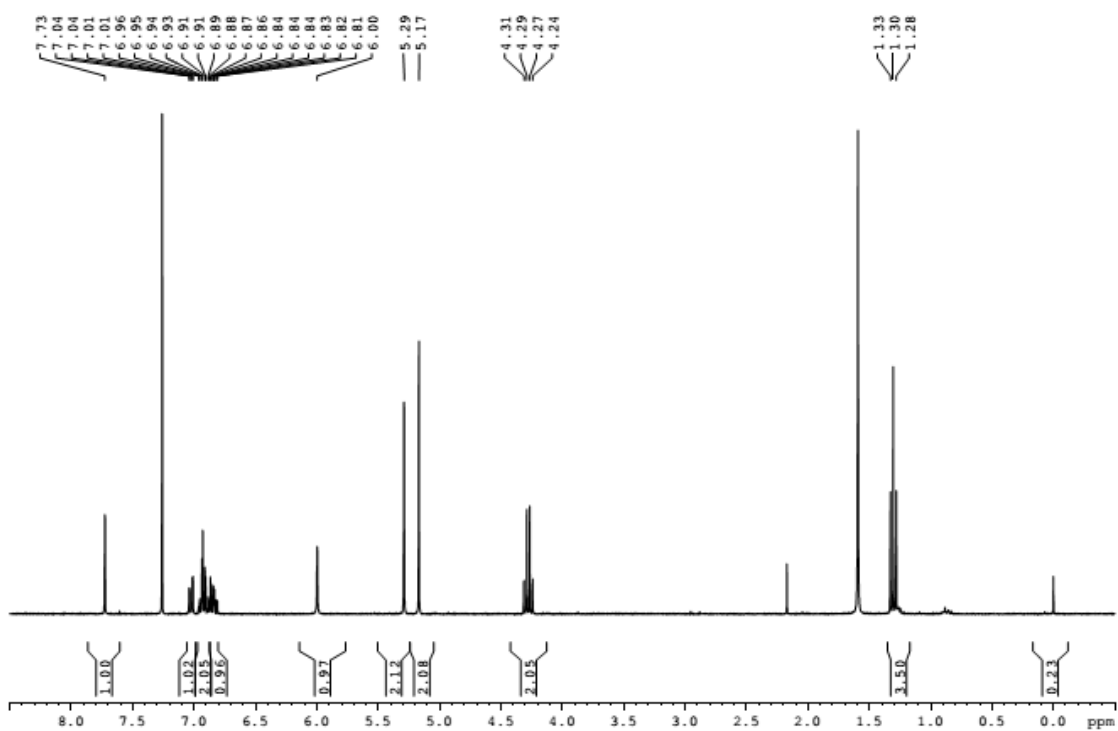

<sup>13</sup>C NMR (75 MHz, CDCl<sub>3</sub>)

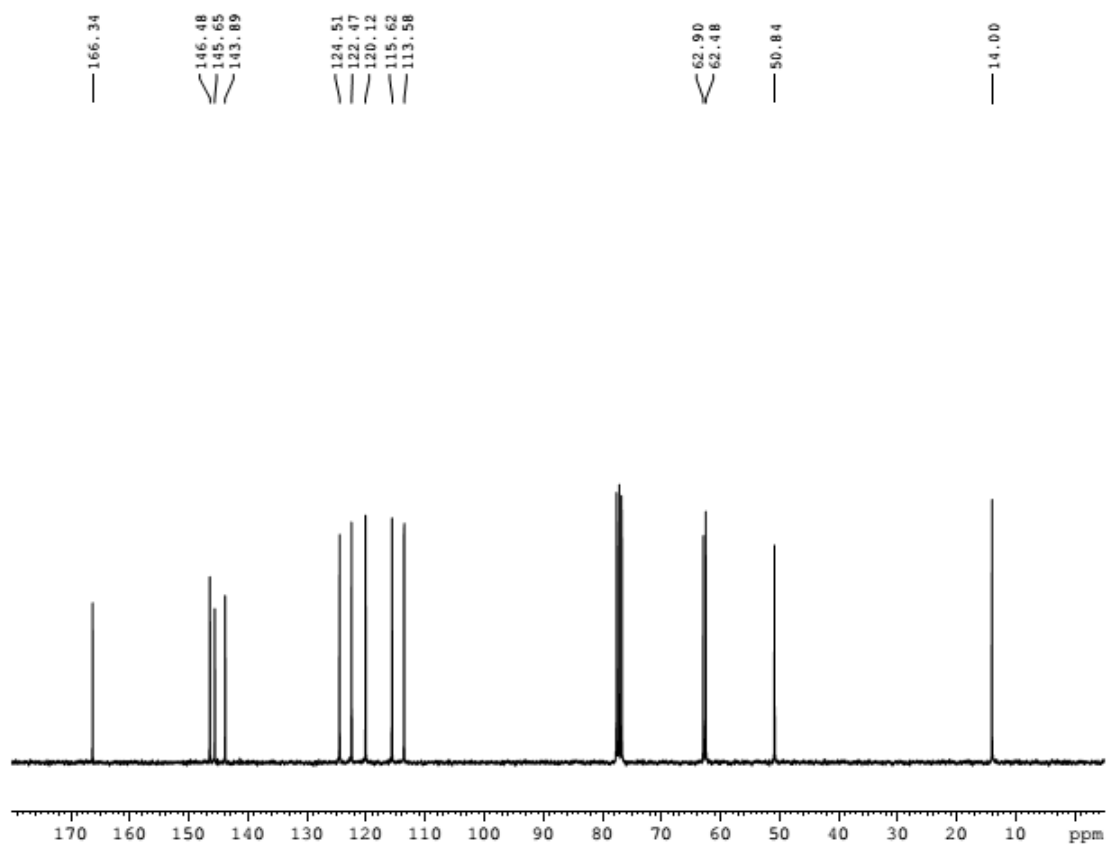

# HSQC

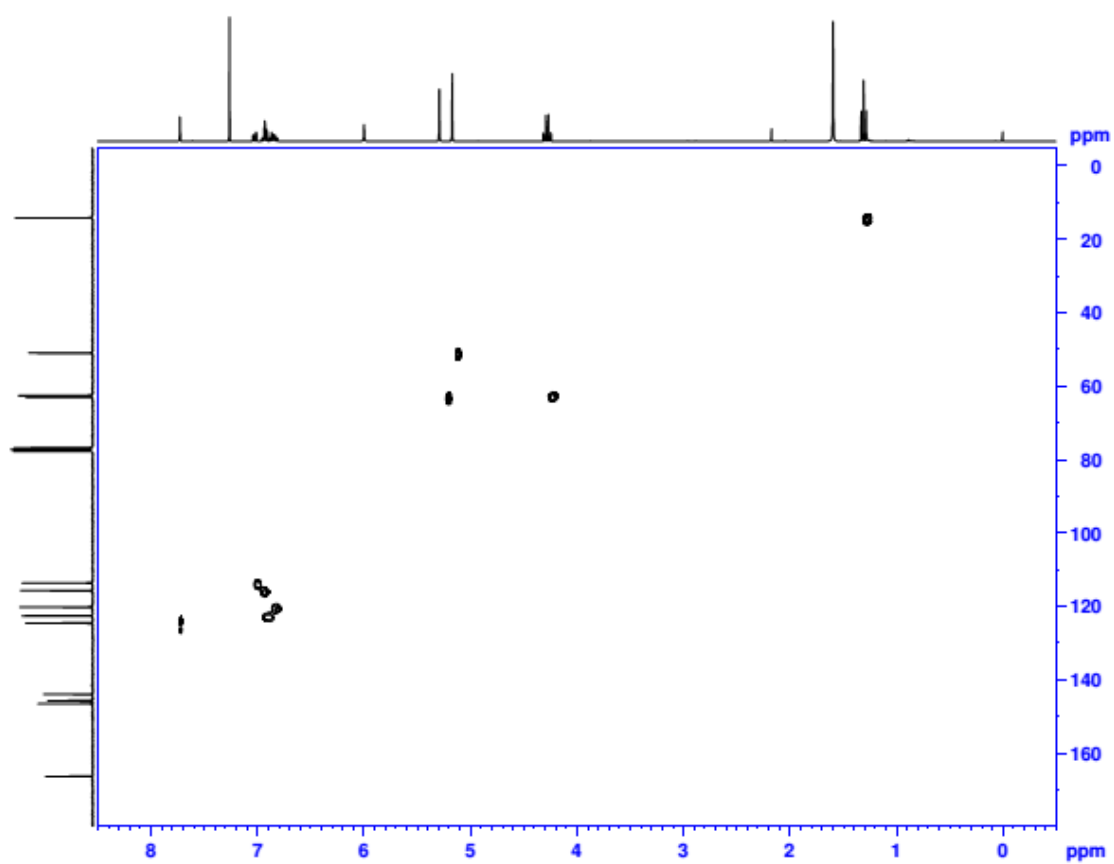

## Compound 5i

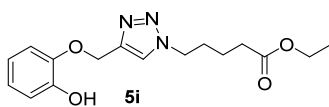

### <sup>1</sup>H NMR (300 MHz, CDCl<sub>3</sub>)

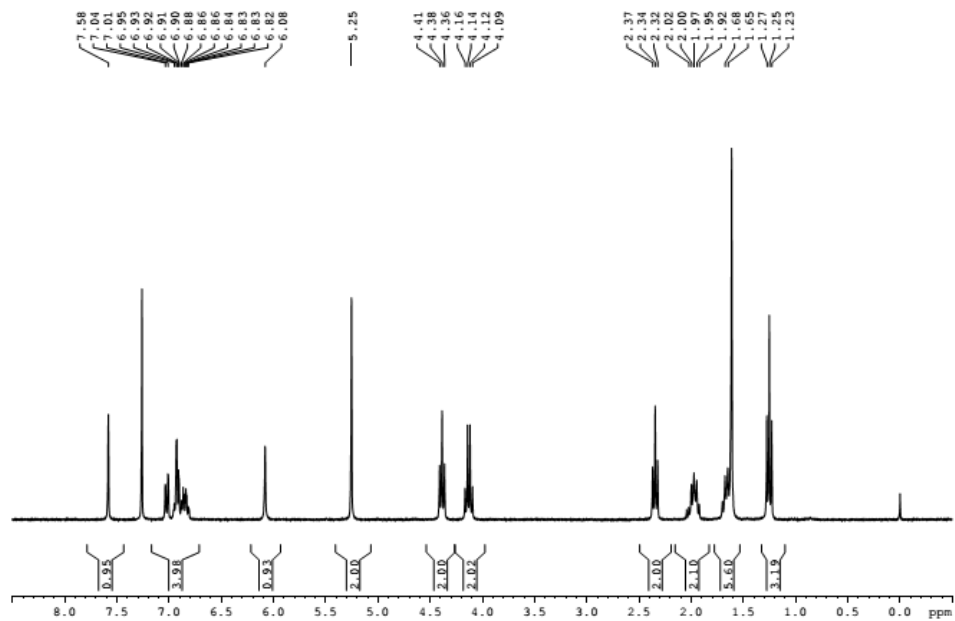

**<sup>13</sup>C NMR (75 MHz, CDCl<sub>3</sub>)**

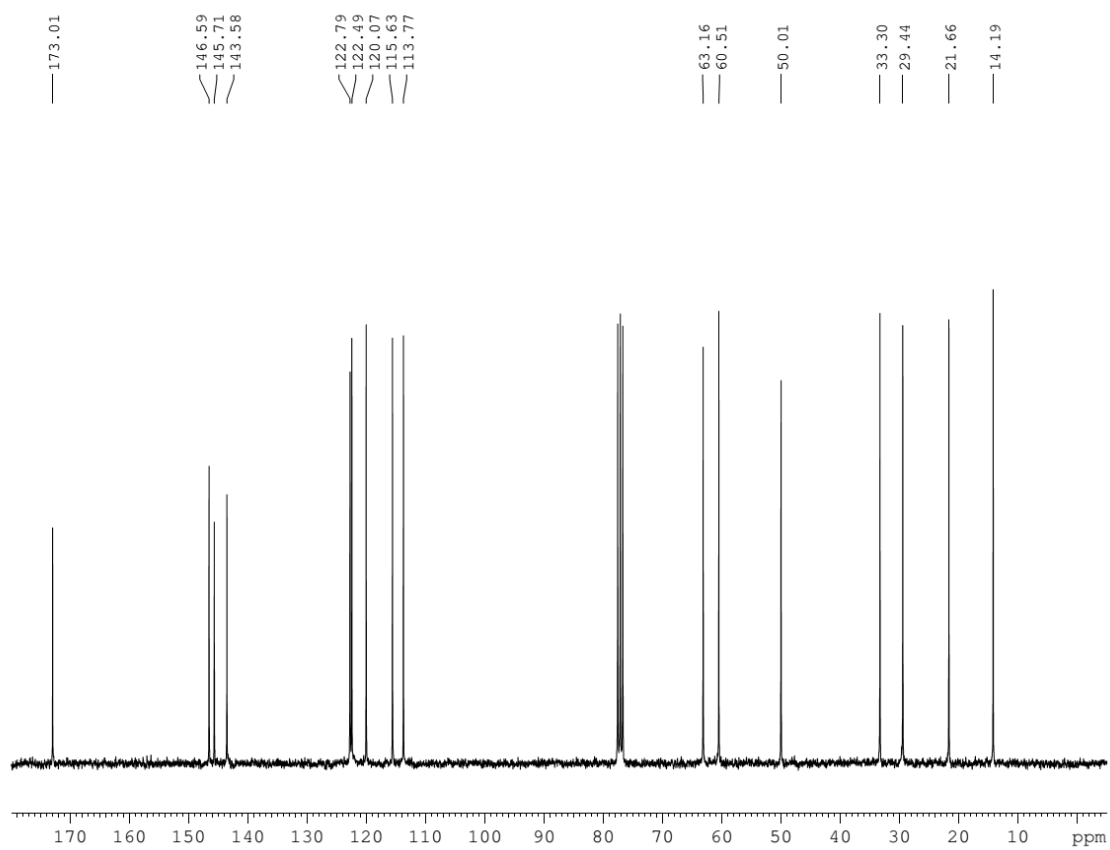

# HSQC

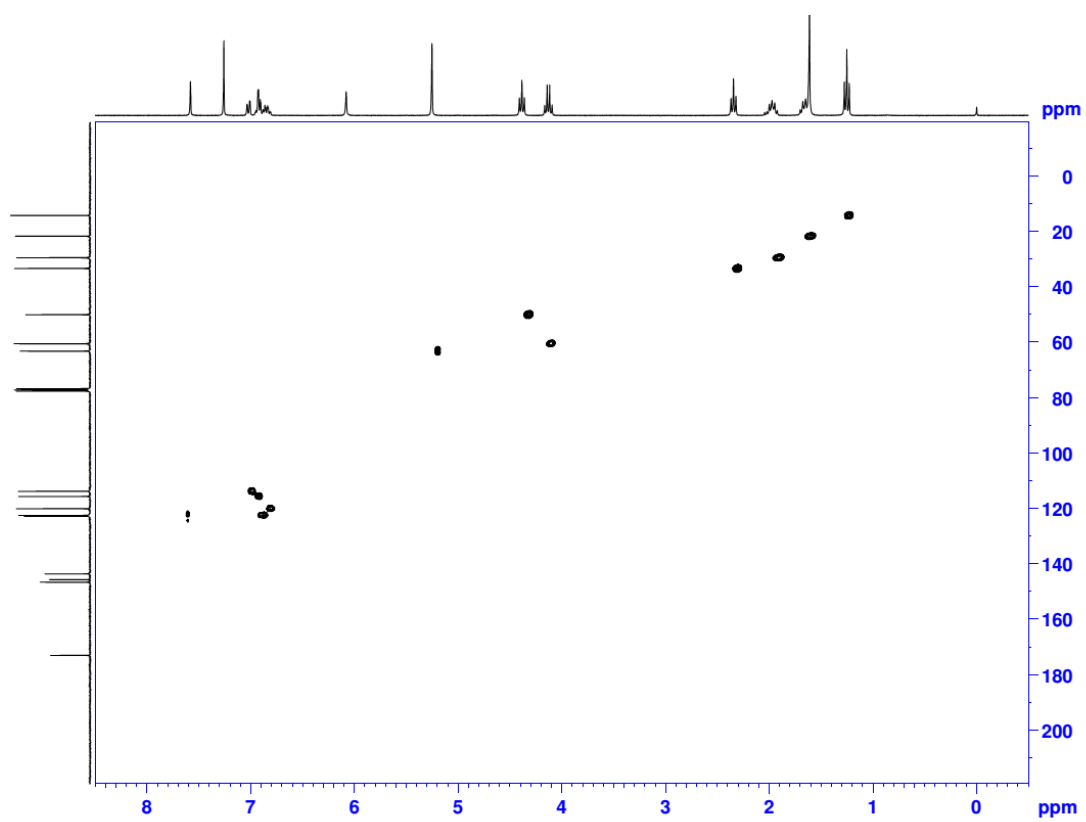

## Compound 6a

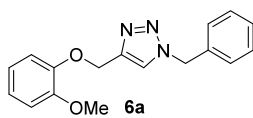

### $^1\text{H}$ NMR (300 MHz, $\text{CDCl}_3$ )

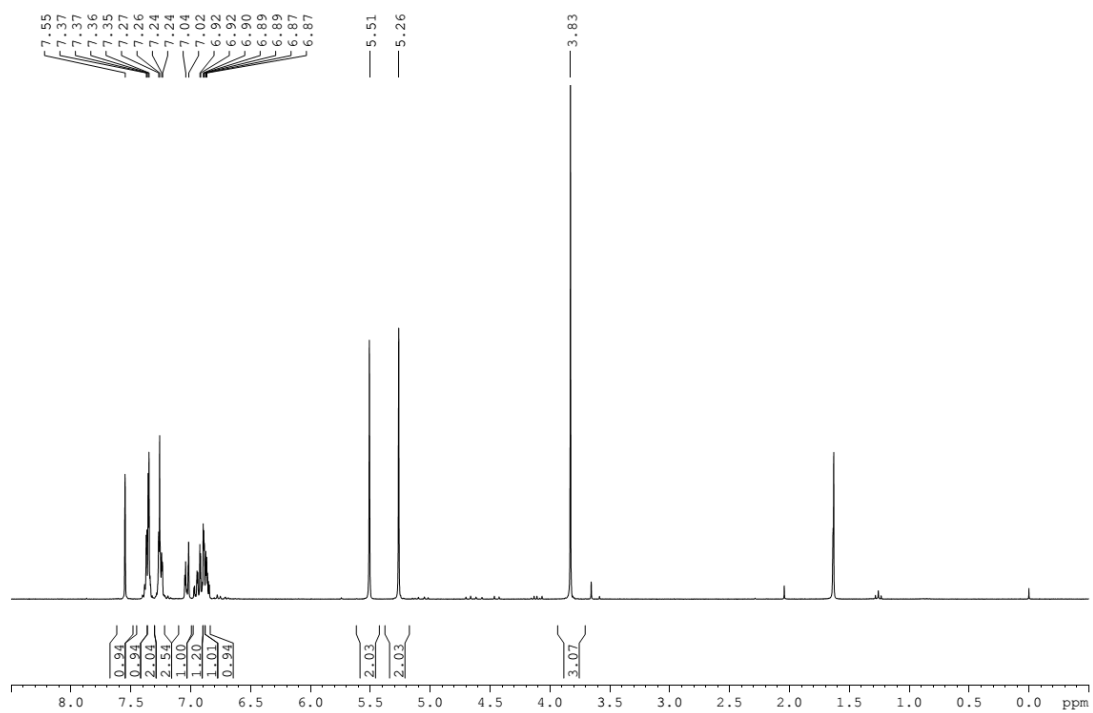



<sup>13</sup>C NMR (75 MHz, CDCl<sub>3</sub>)

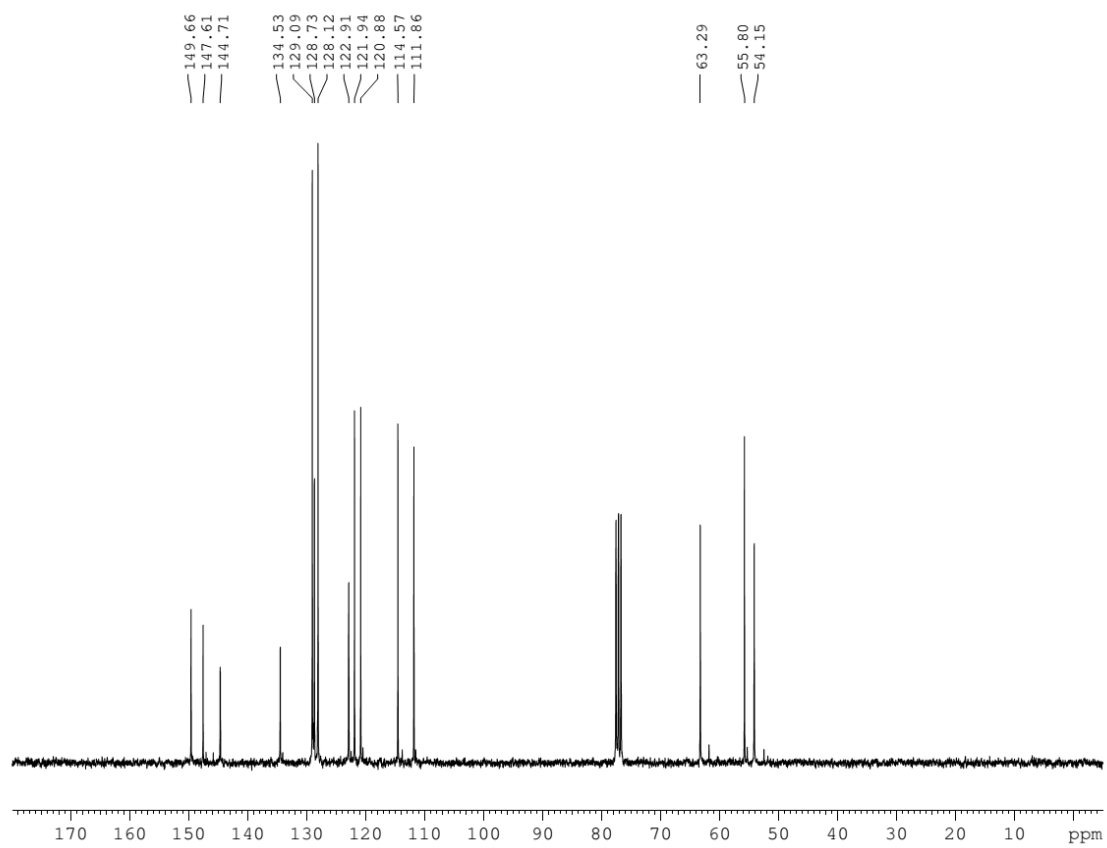

# HSQC

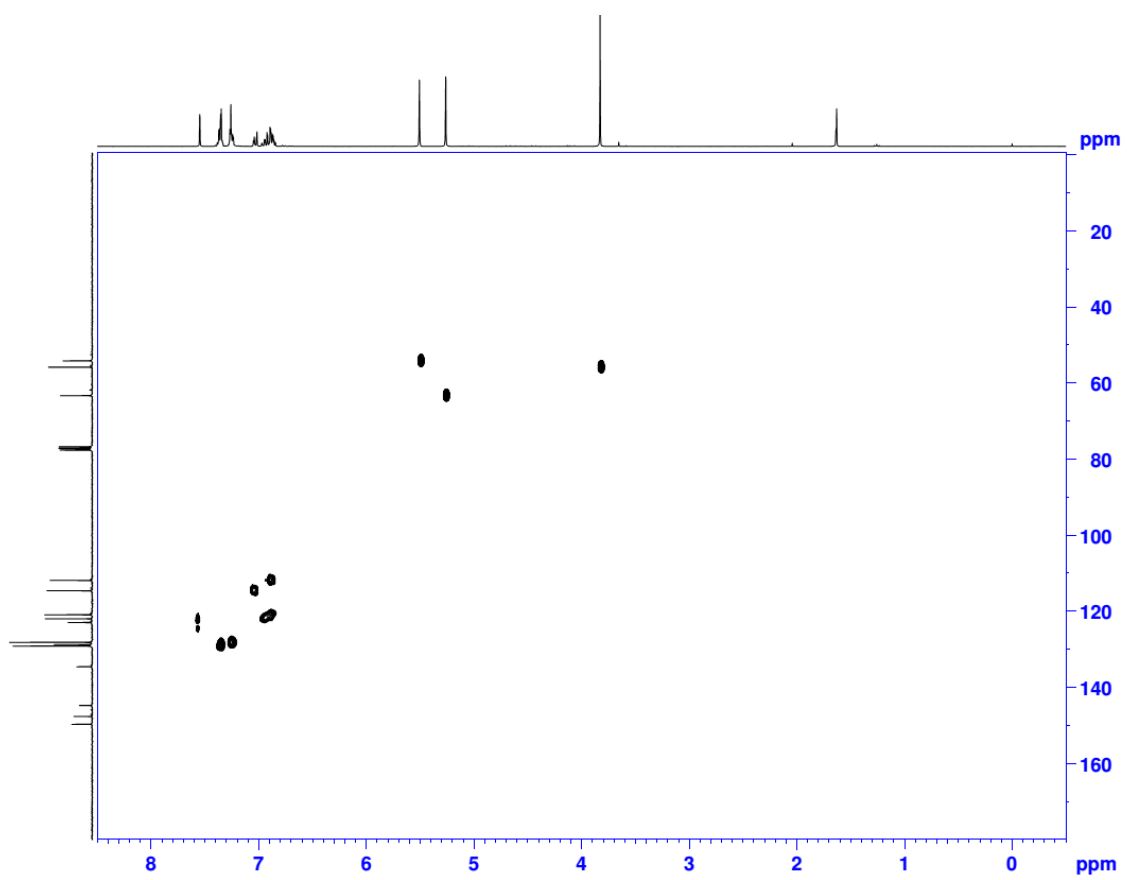

# Compound 6b

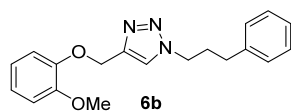

## <sup>1</sup>H NMR (300 MHz, CDCl<sub>3</sub>)

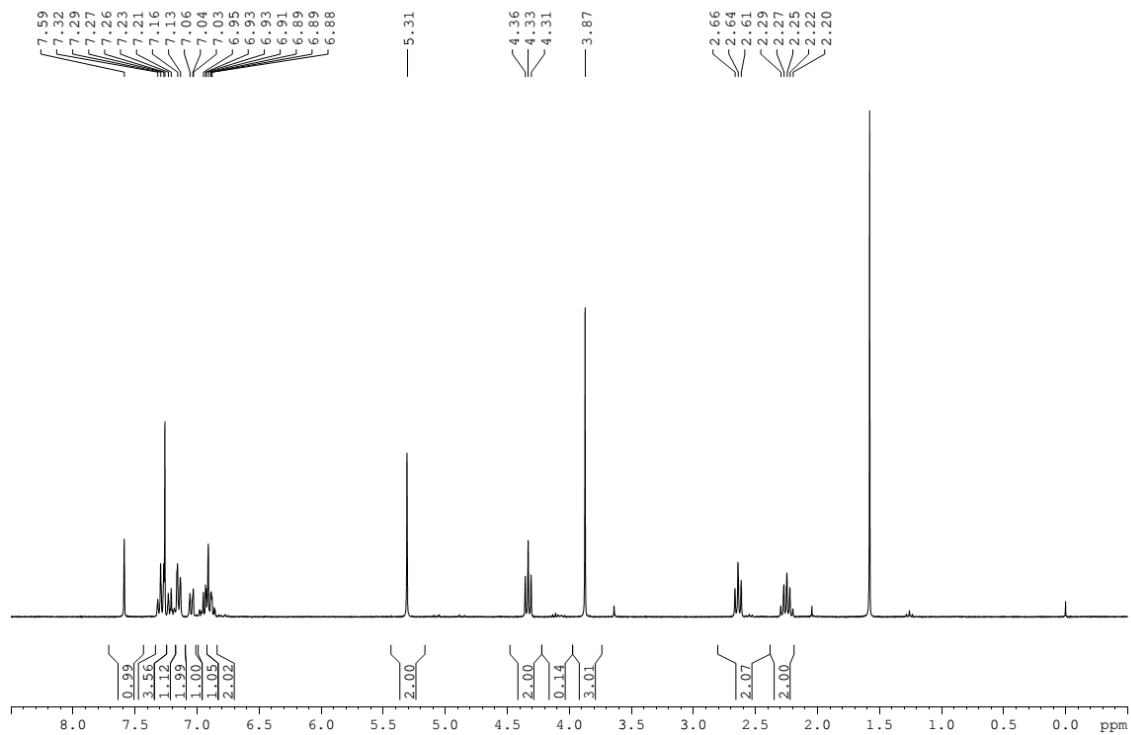

**$^{13}\text{C}$  NMR (75 MHz,  $\text{CDCl}_3$ )**

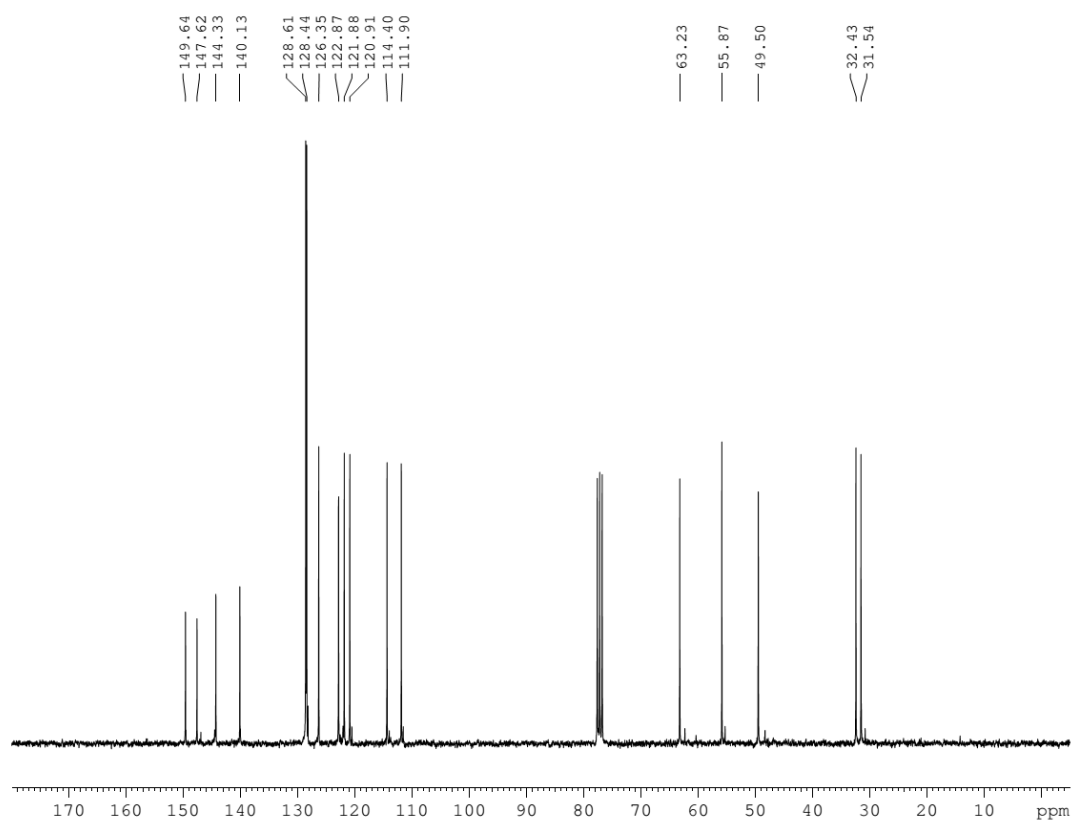

# HSQC

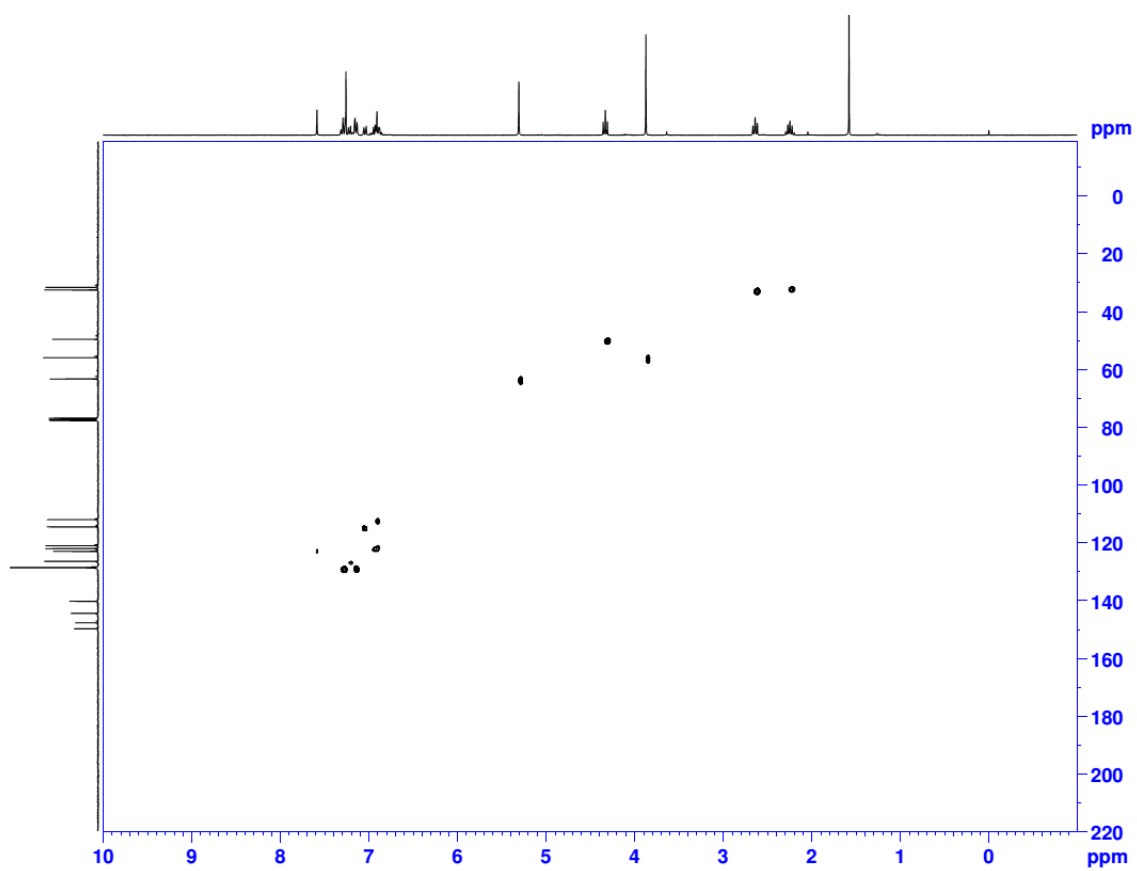

# Compound 6c

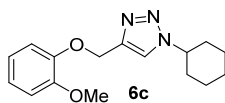

## <sup>1</sup>H NMR (300 MHz, CDCl<sub>3</sub>)

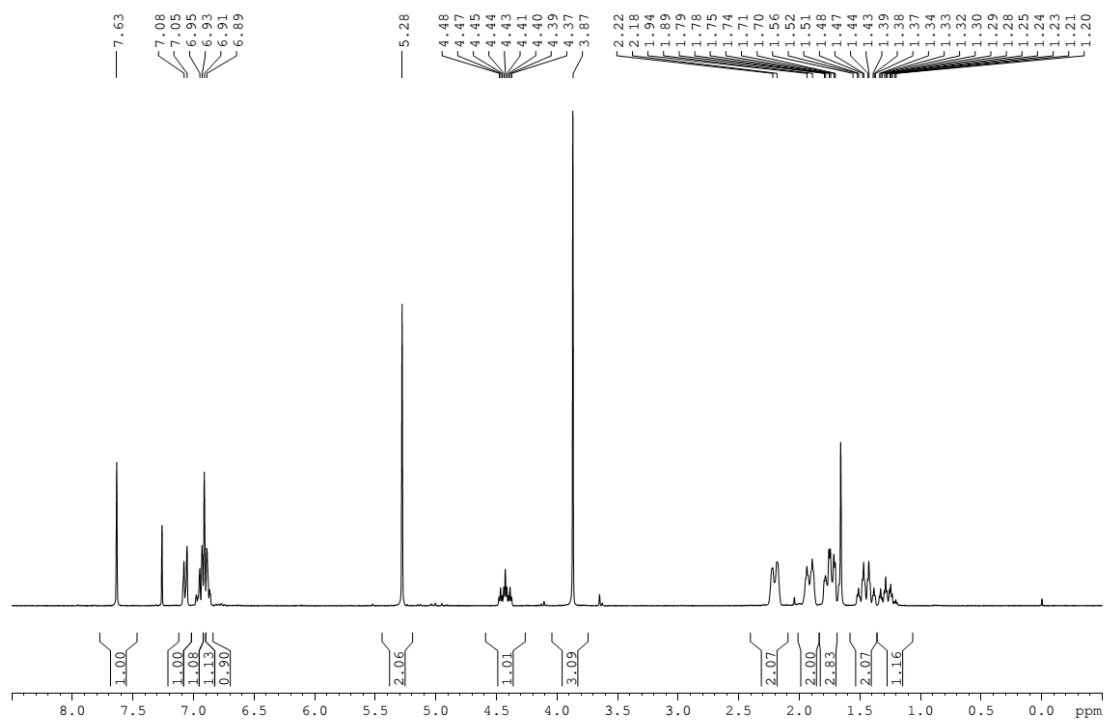

$^{13}\text{C}$  NMR (75 MHz,  $\text{CDCl}_3$ )

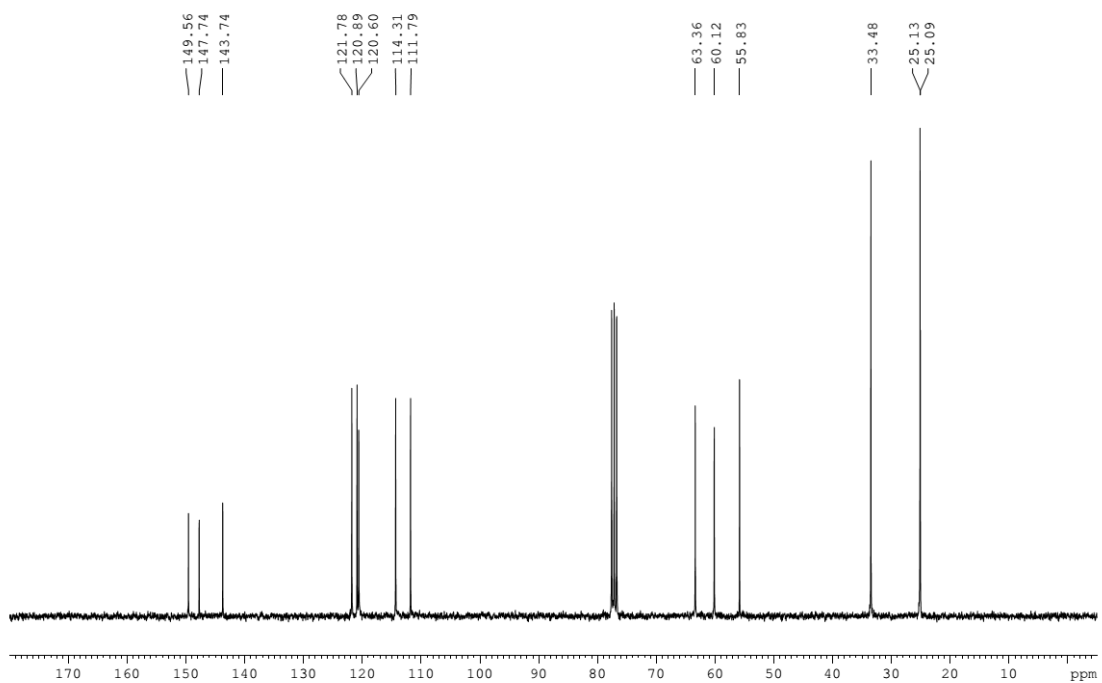

# HSQC

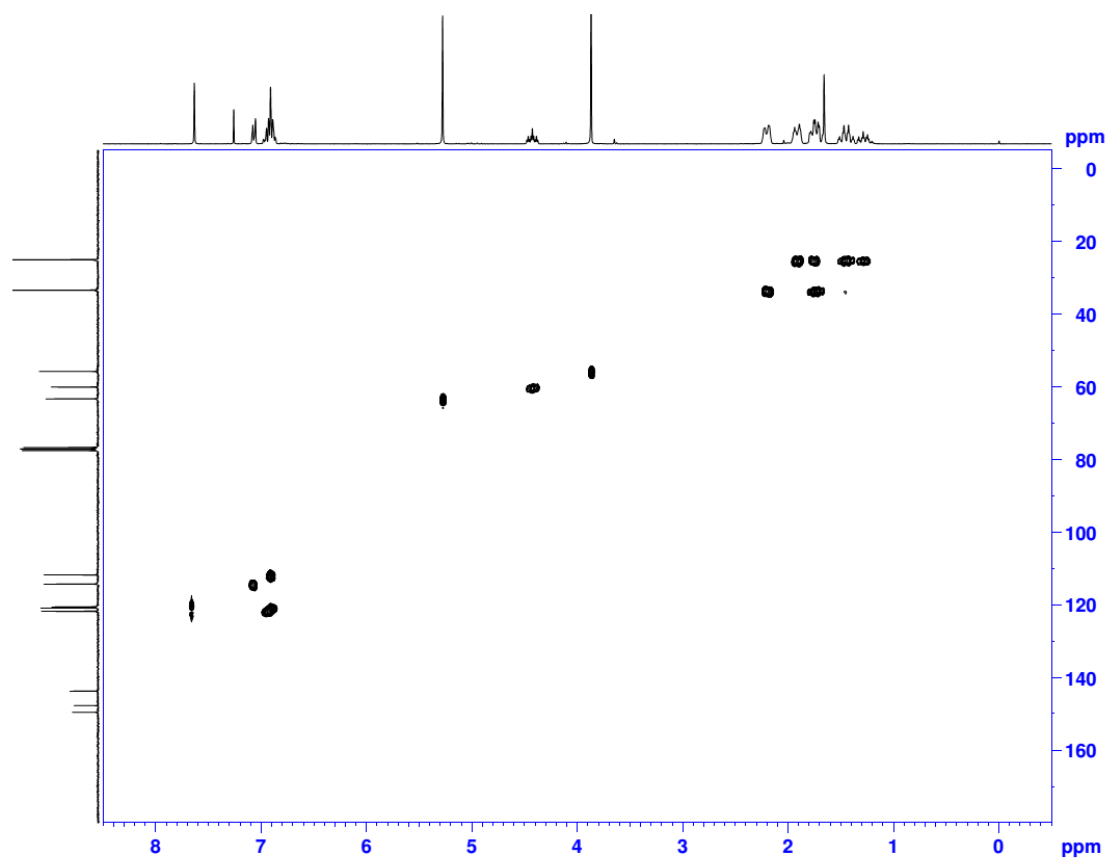



## Compound 6d

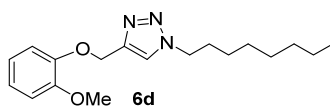

### $^1\text{H}$ NMR (300 MHz, $\text{CDCl}_3$ )

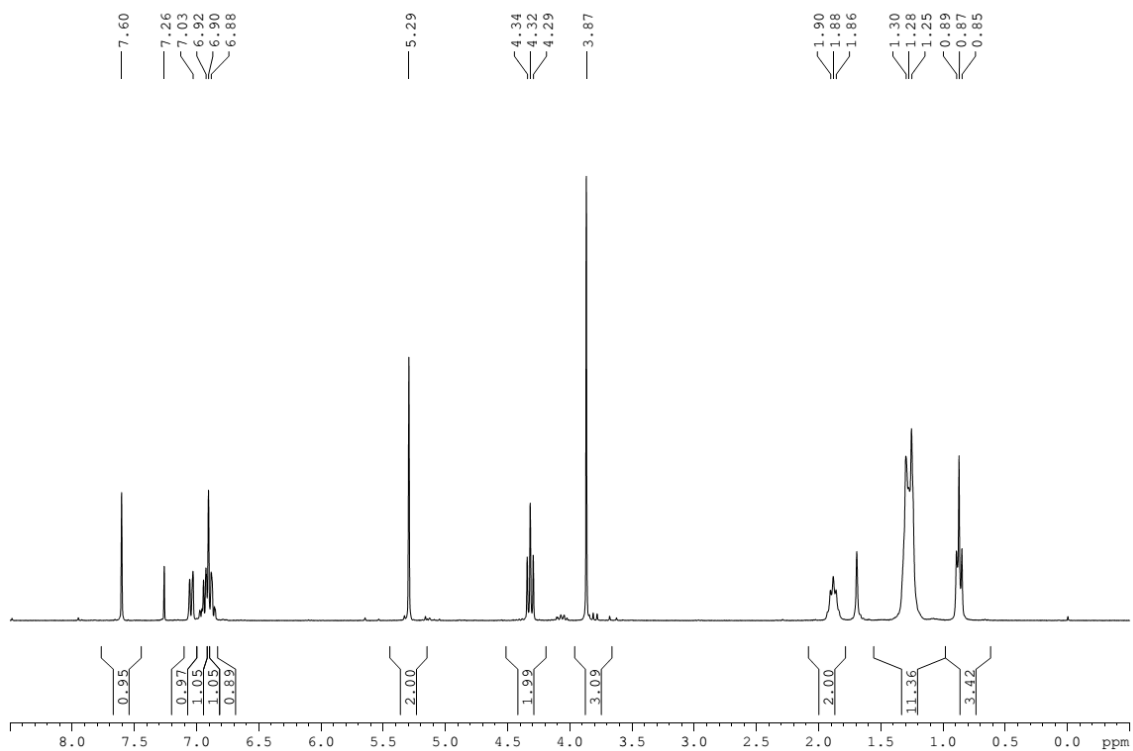

**$^{13}\text{C}$  NMR (75 MHz,  $\text{CDCl}_3$ )**

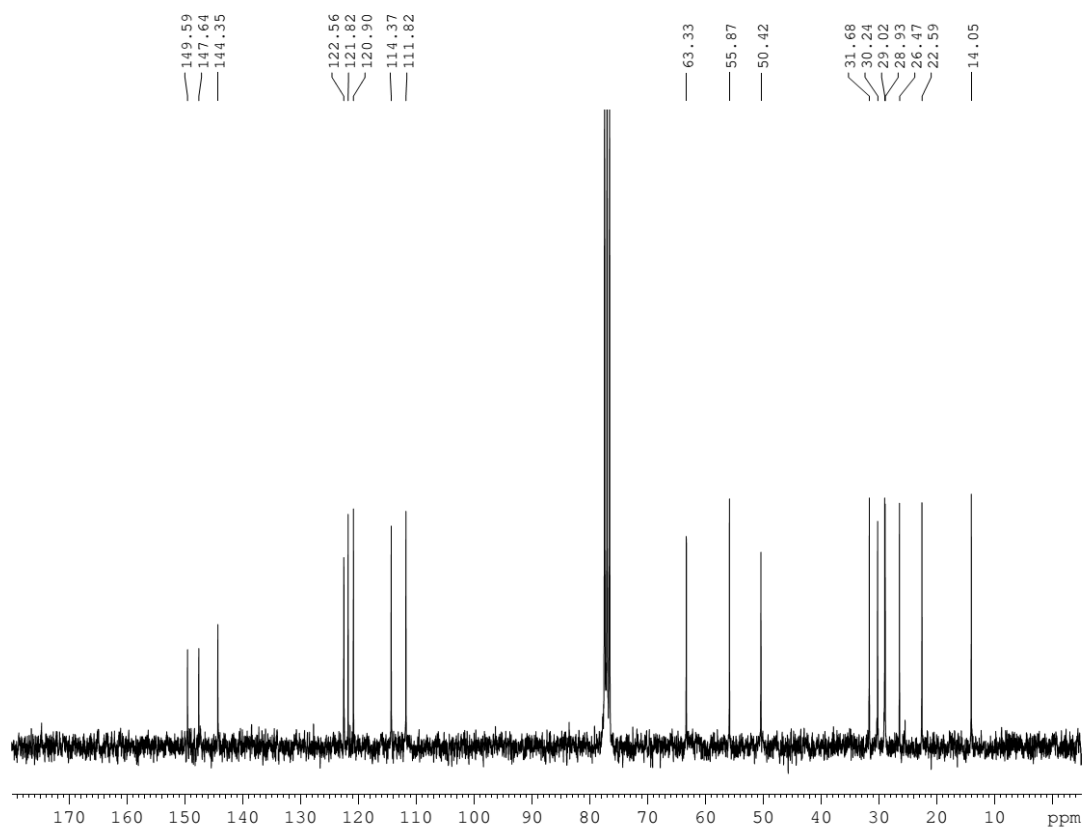

# HSQC

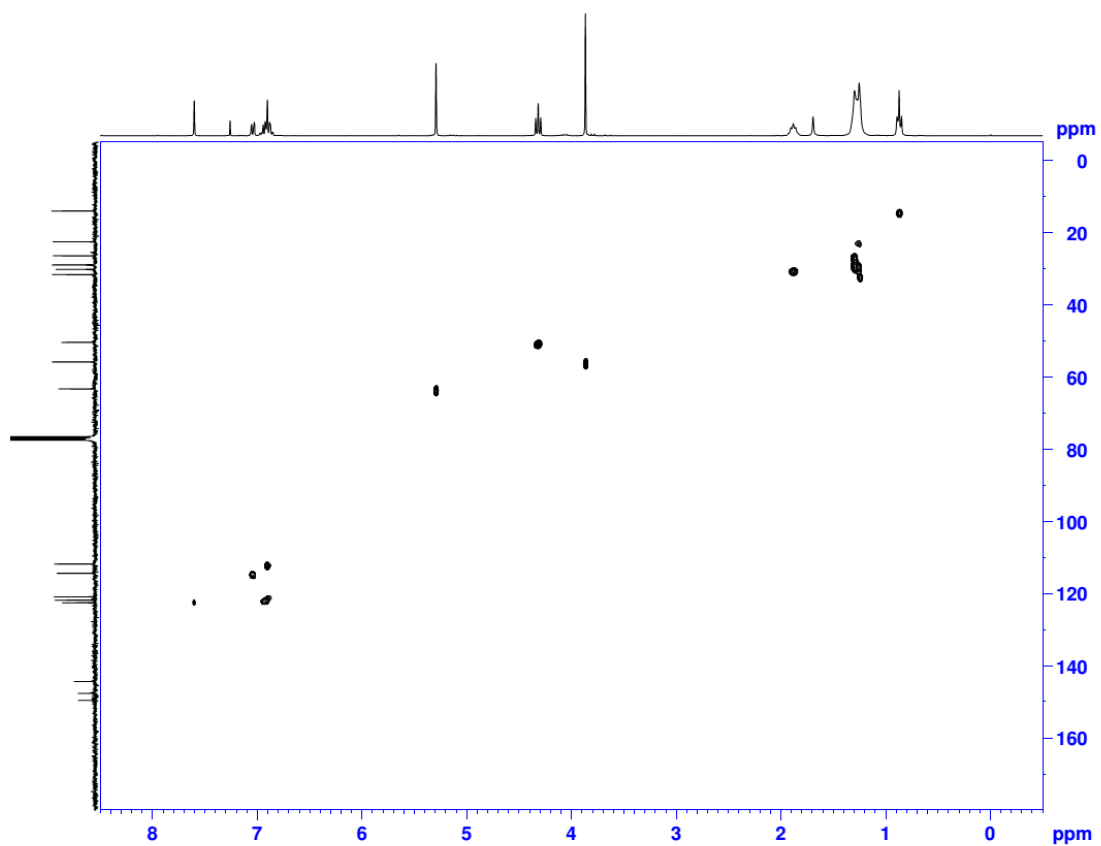

## Compound 6e

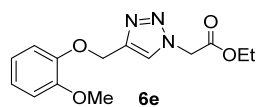

### <sup>1</sup>H NMR (300 MHz, CDCl<sub>3</sub>)

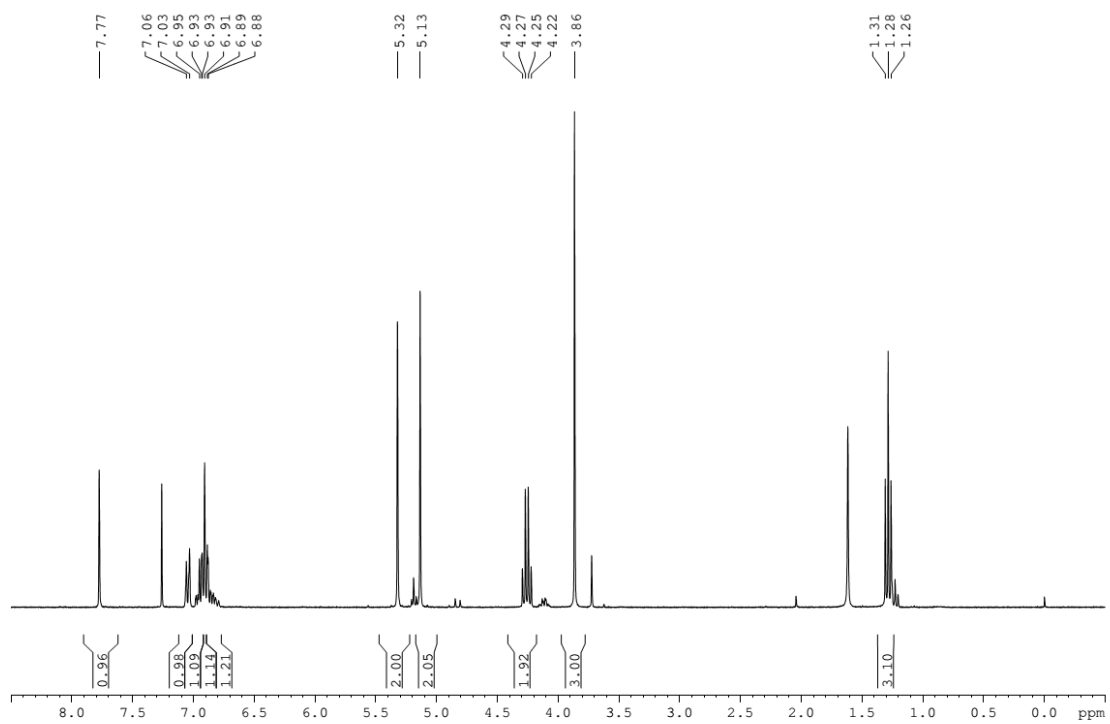

<sup>13</sup>C NMR (75 MHz, CDCl<sub>3</sub>)

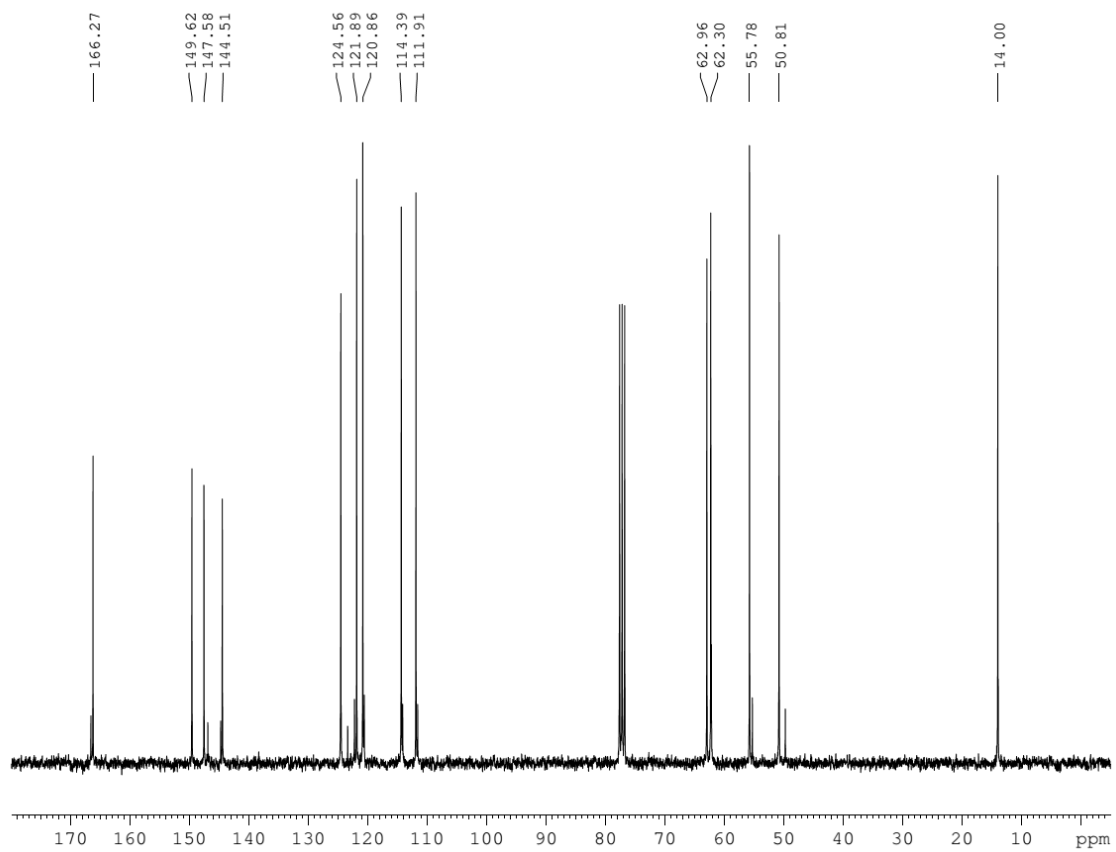

# HSQC

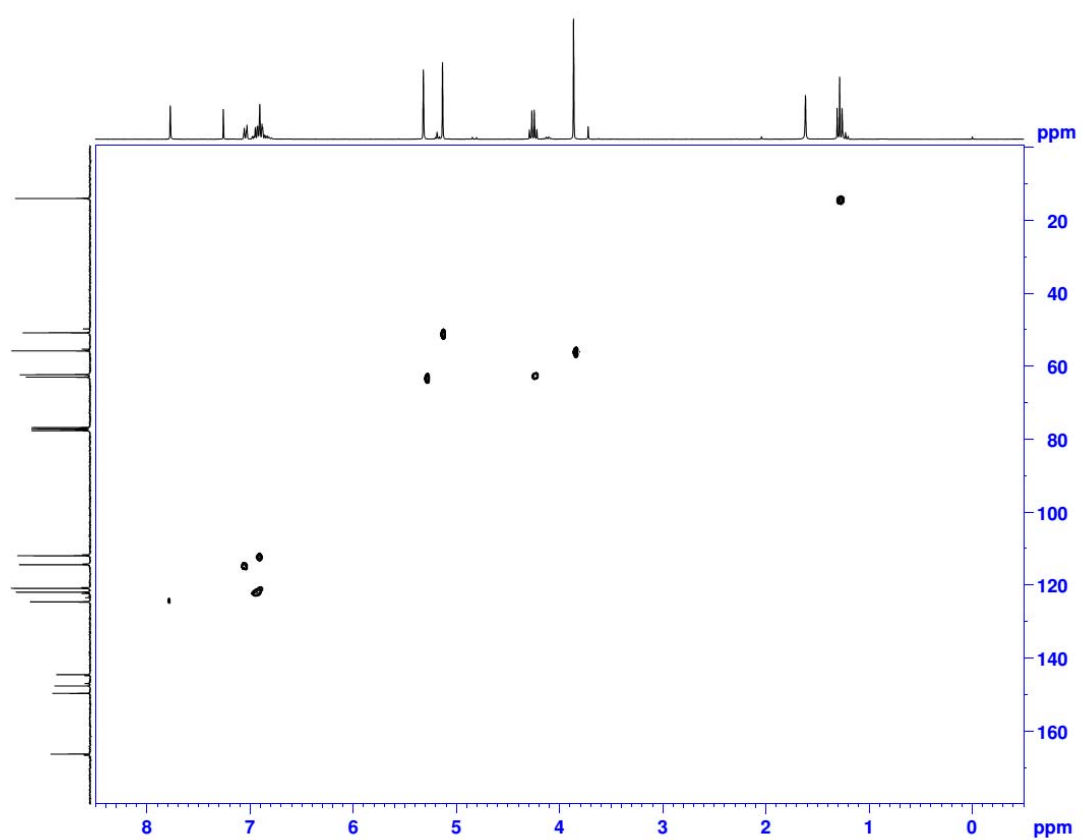

# Compound 9a

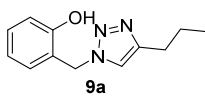

<sup>1</sup>H NMR (300 MHz, CDCl<sub>3</sub>)

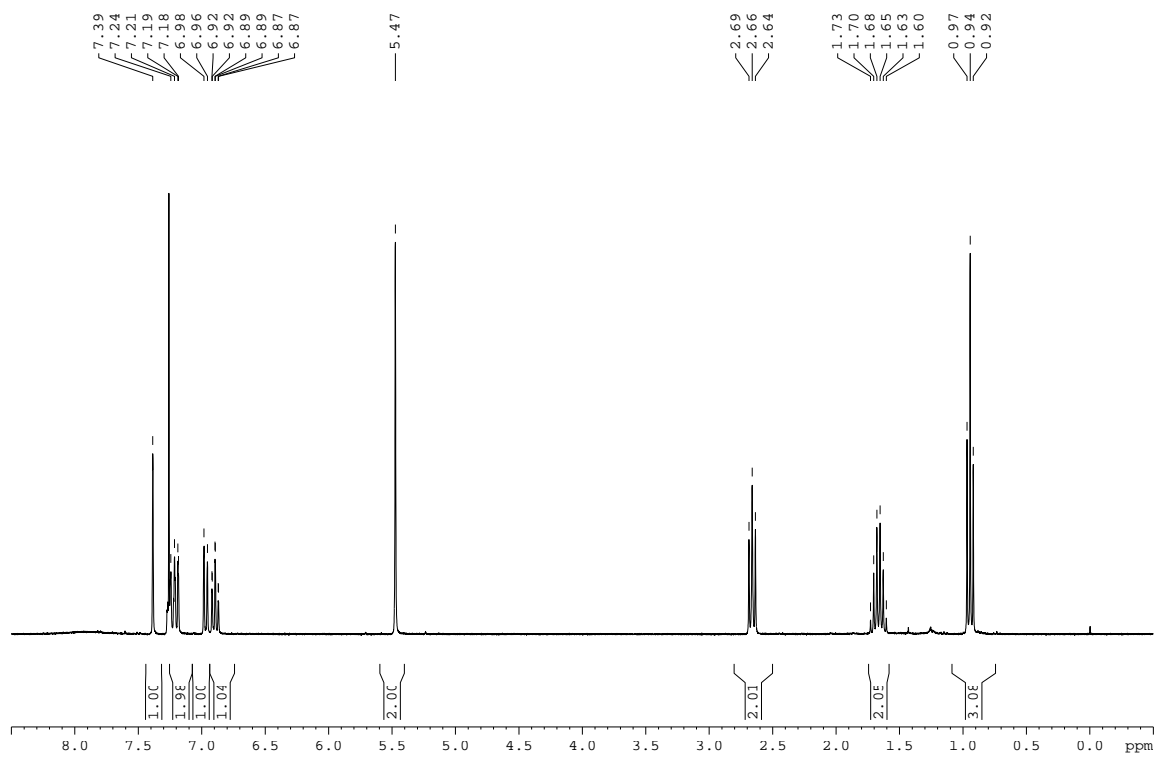

**$^{13}\text{C}$  NMR (75 MHz,  $\text{CDCl}_3$ )**

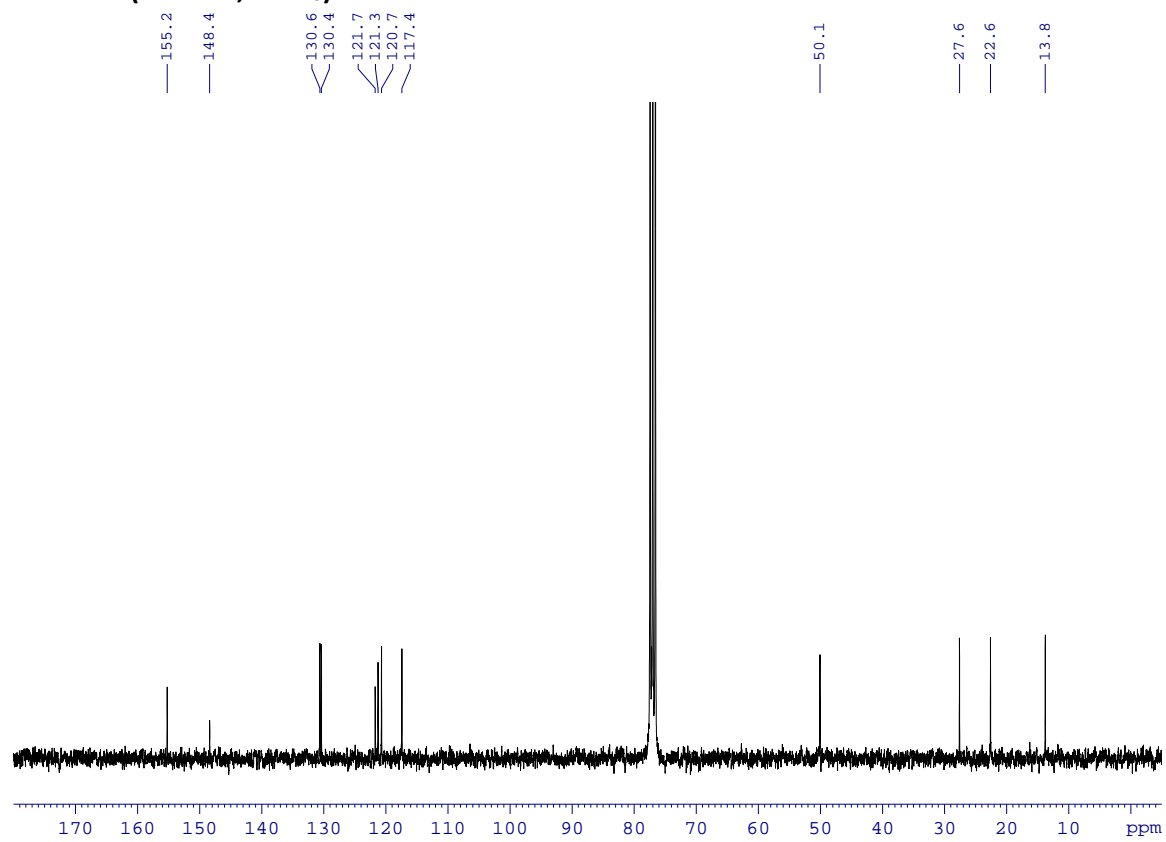



HSQC

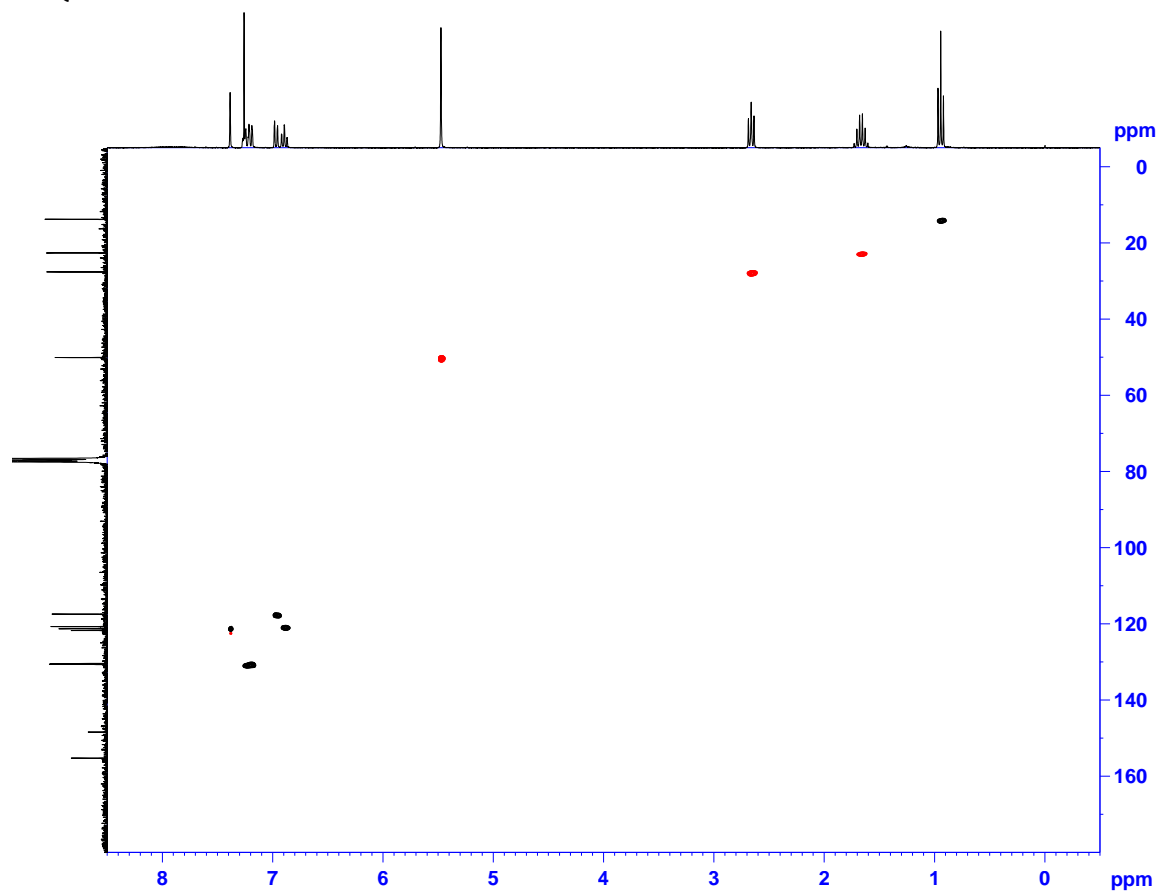

## Compound 9b

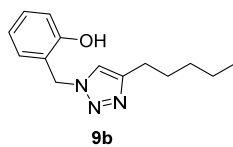

### $^1\text{H}$ NMR (300 MHz, $\text{CDCl}_3$ )

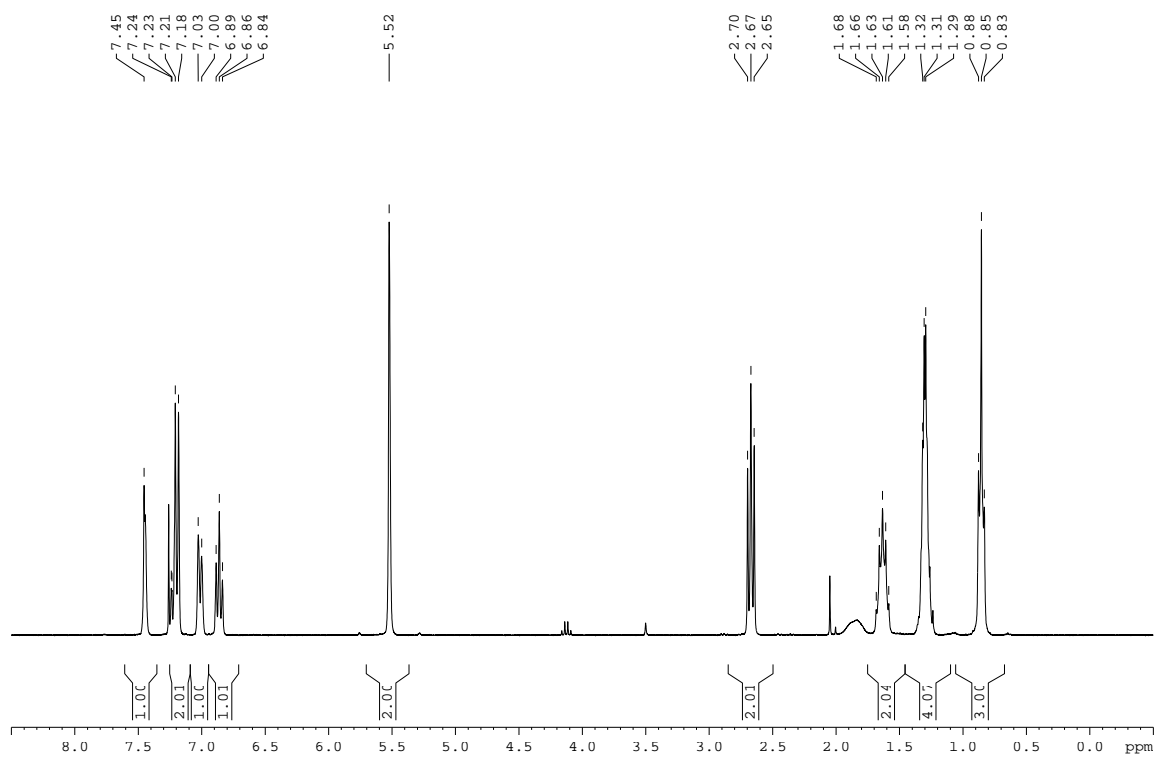

**$^{13}\text{C}$  NMR (75 MHz,  $\text{CDCl}_3$ )**

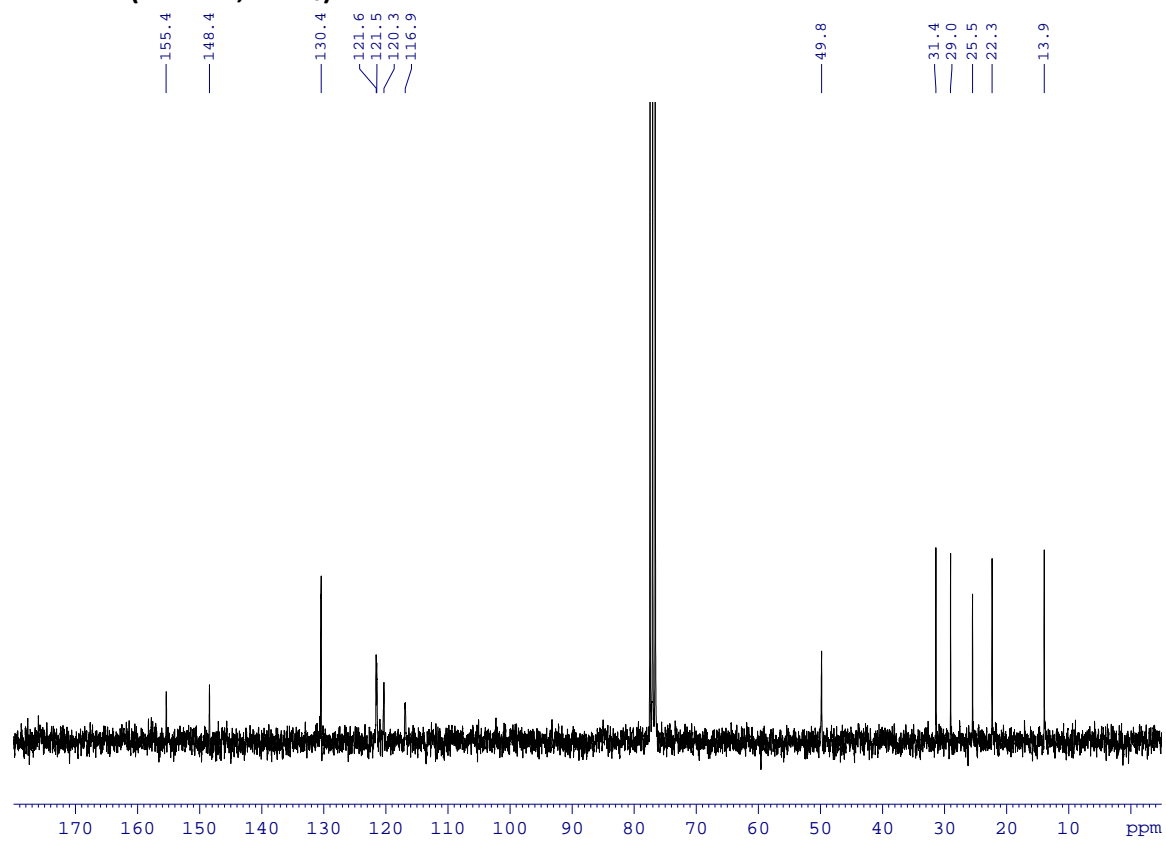

HSQC

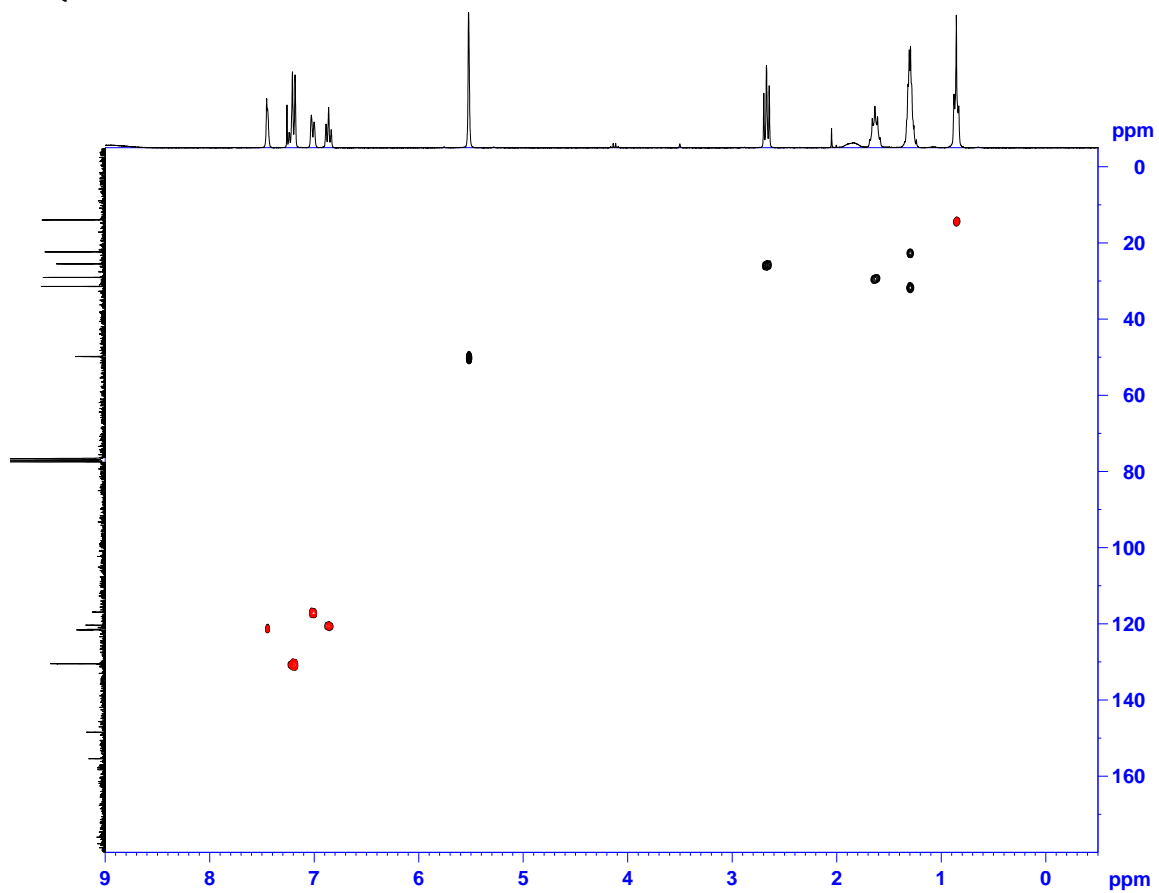

# Compound 9c

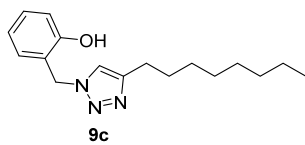

<sup>1</sup>H NMR (300 MHz, CDCl<sub>3</sub>)

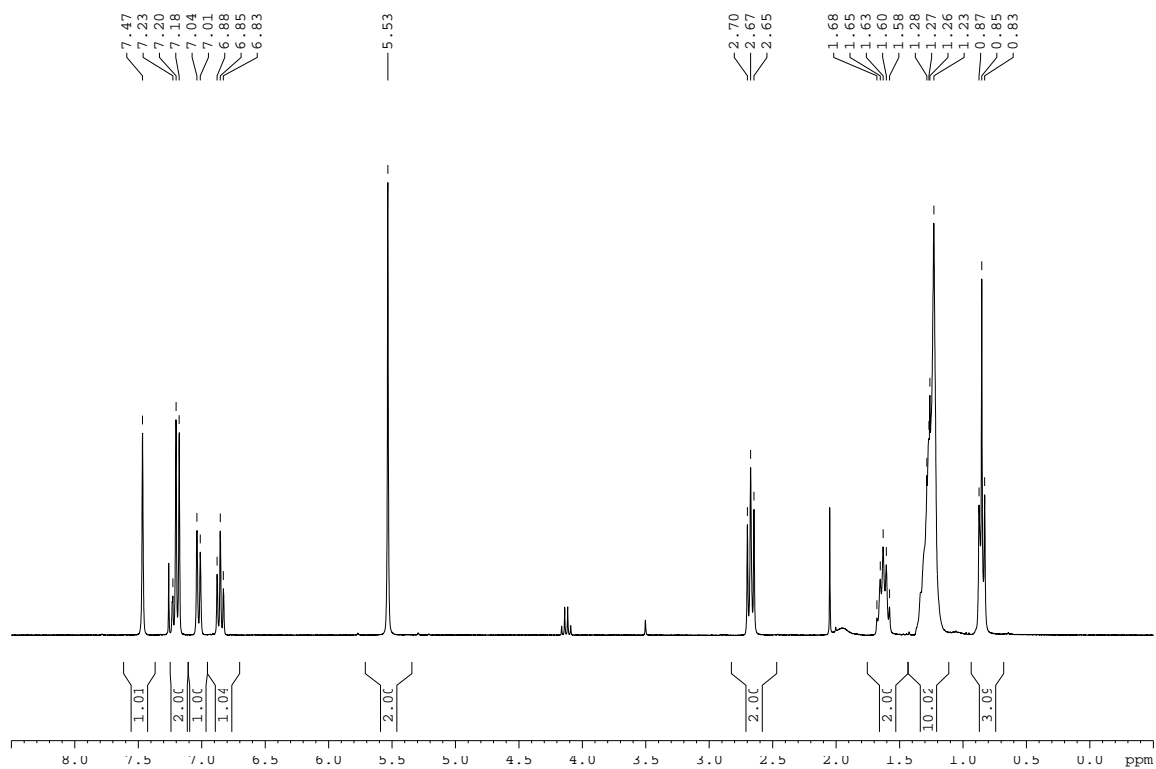

**$^{13}\text{C}$  NMR (75 MHz,  $\text{CDCl}_3$ )**

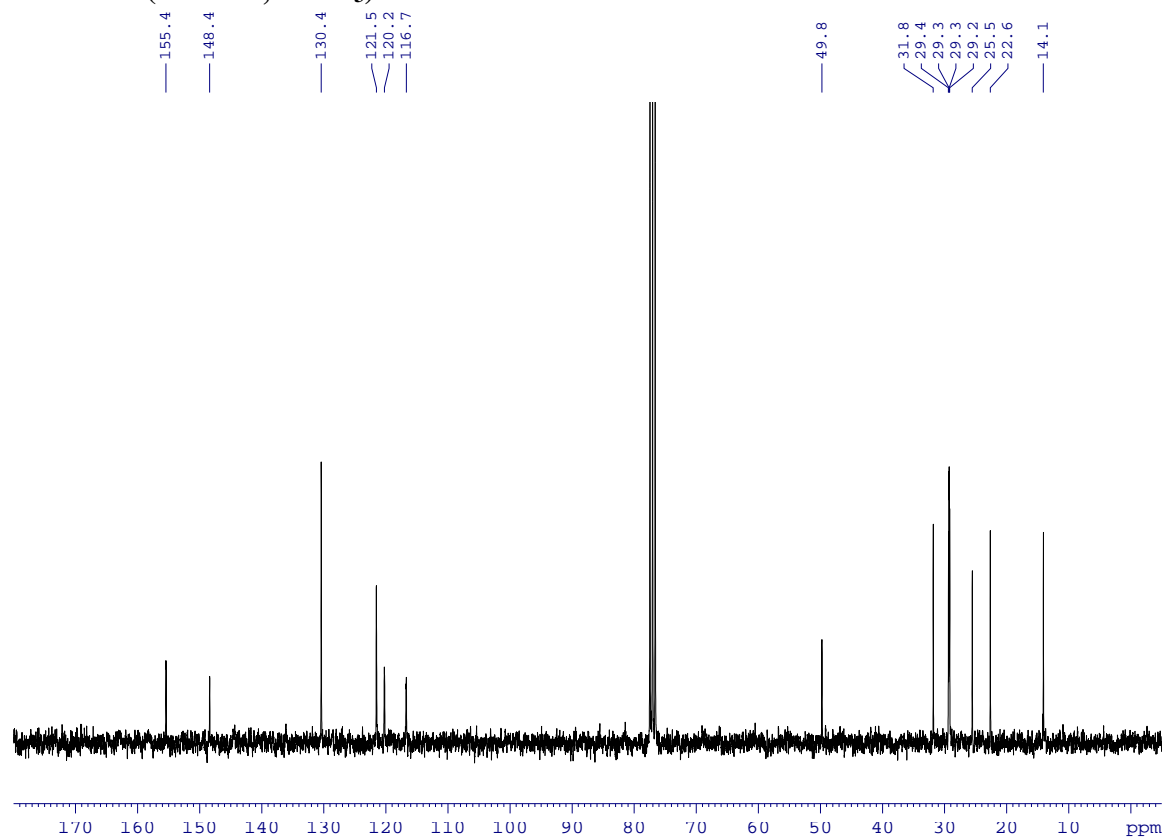

# HSQC

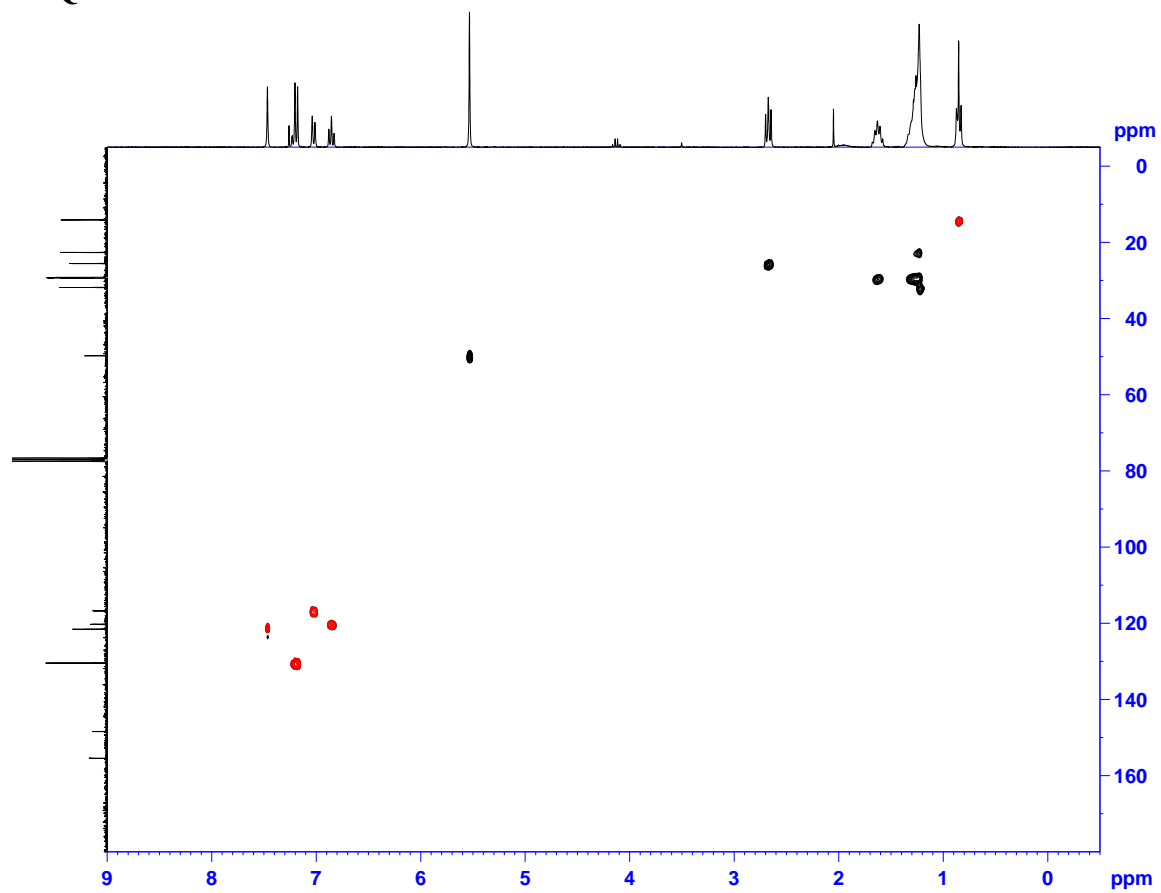

# Compound 9d

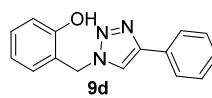

<sup>1</sup>H NMR (300 MHz, CDCl<sub>3</sub>)

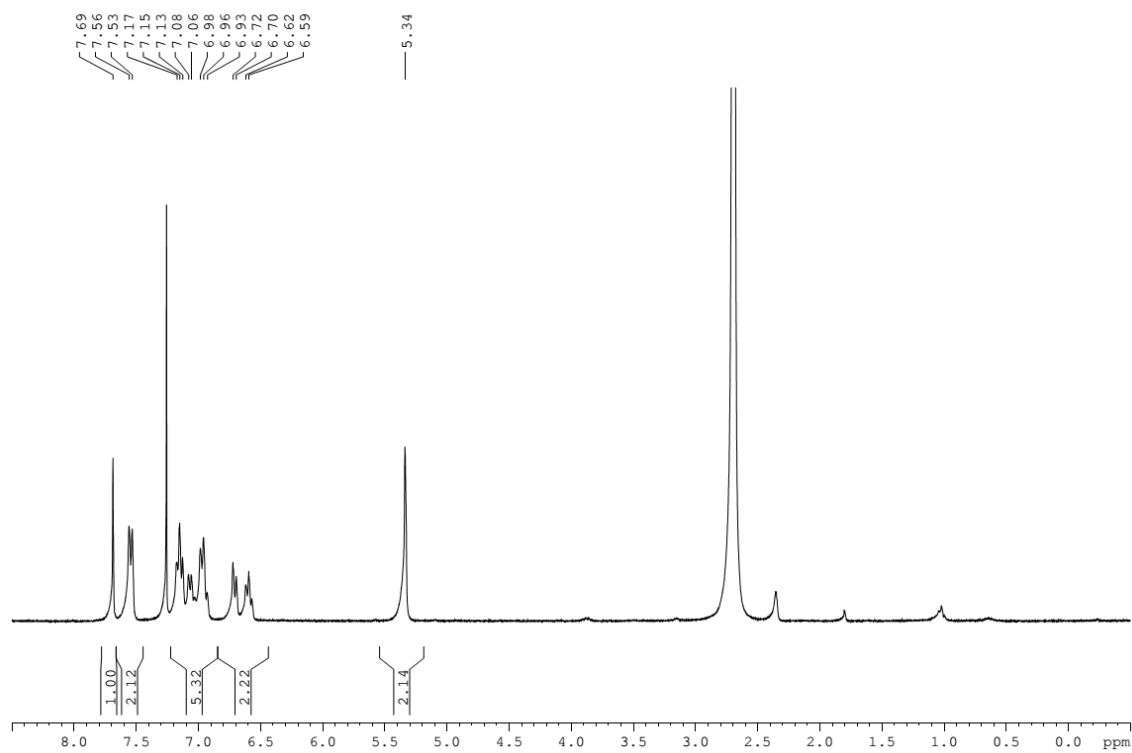



**<sup>13</sup>C NMR (75 MHz, CDCl<sub>3</sub>)**

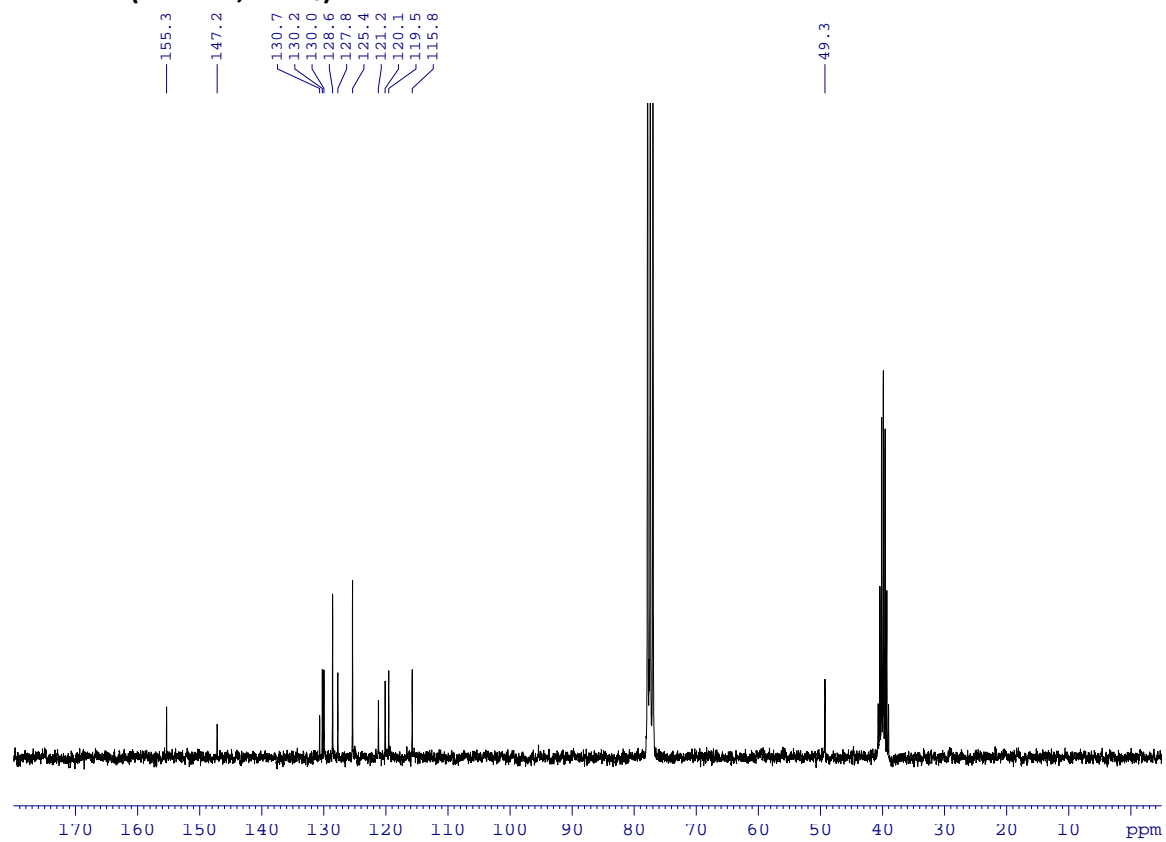

HSQC

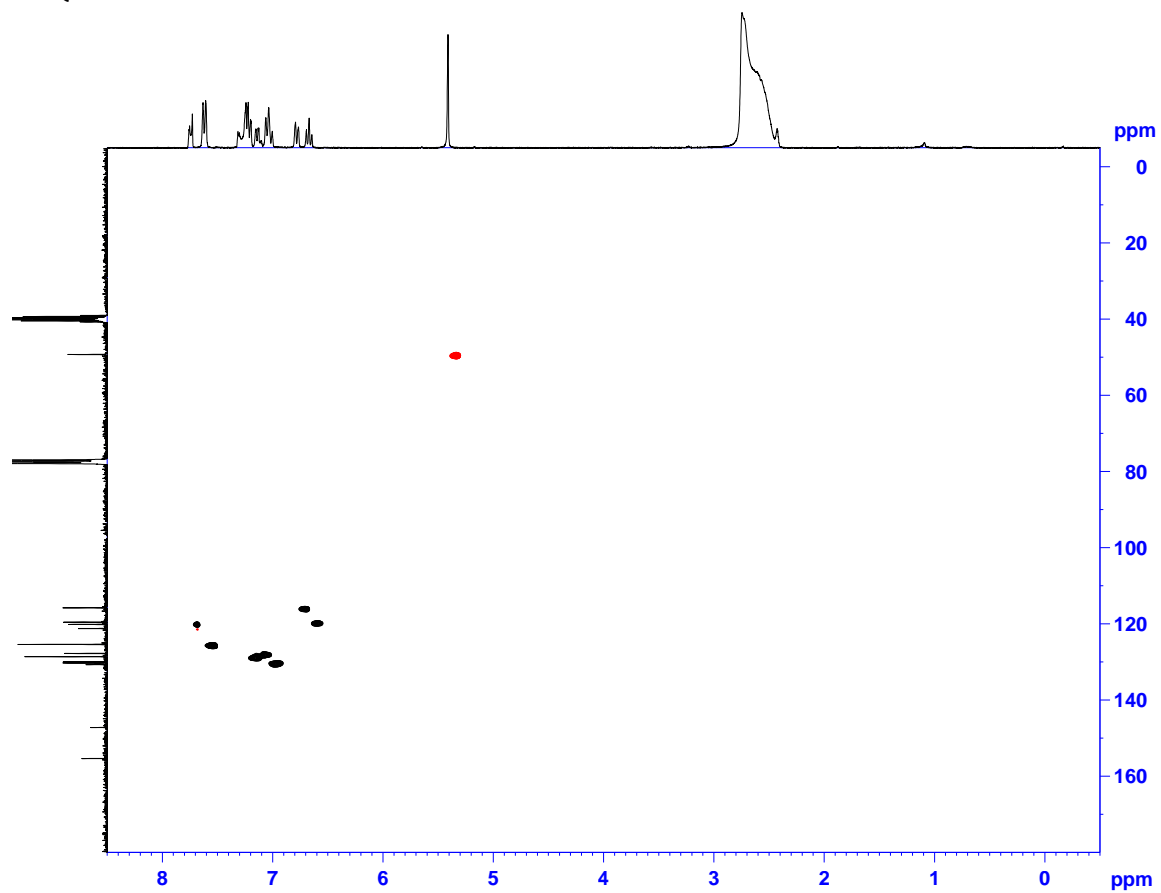

# Compound 9e

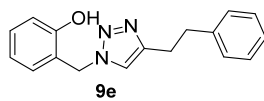

## <sup>1</sup>H NMR (300 MHz, CDCl<sub>3</sub>)

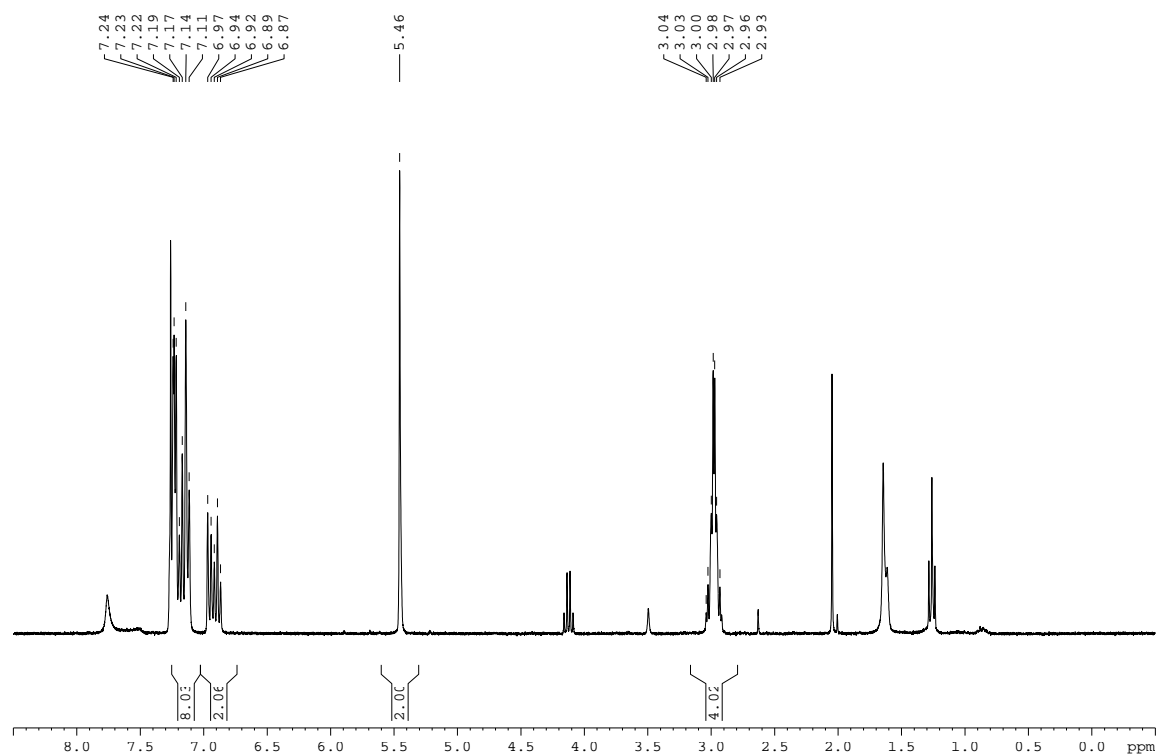

**$^{13}\text{C}$  NMR (75 MHz,  $\text{CDCl}_3$ )**

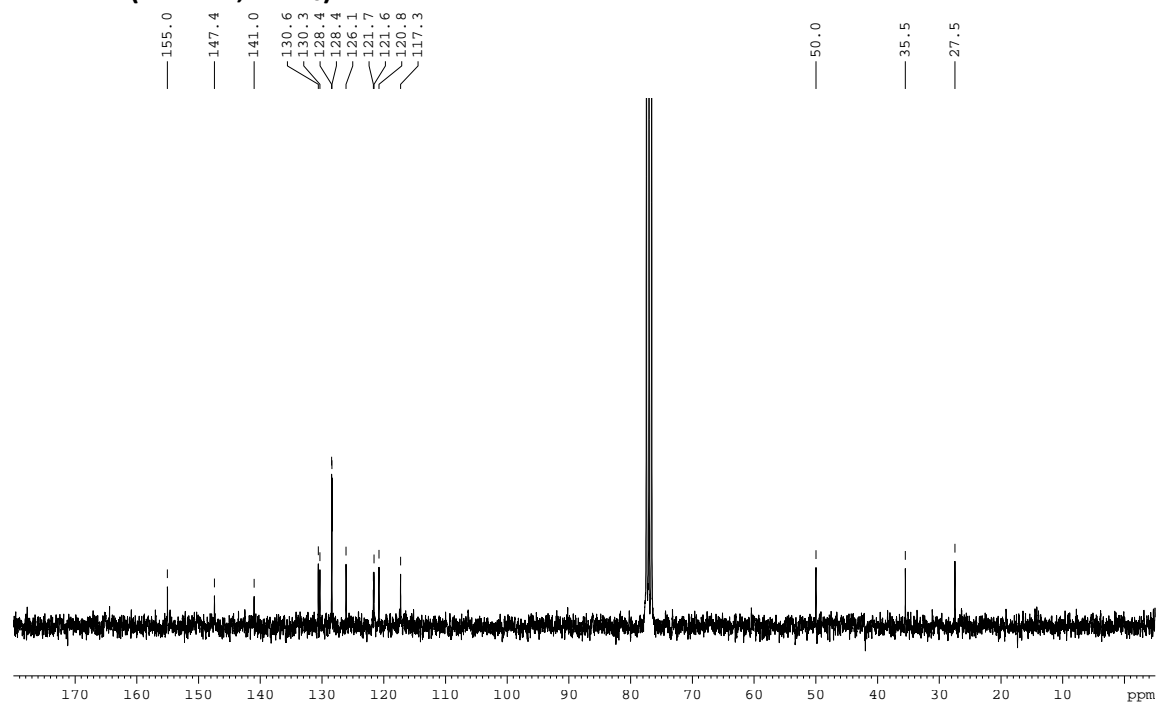

# HSQC

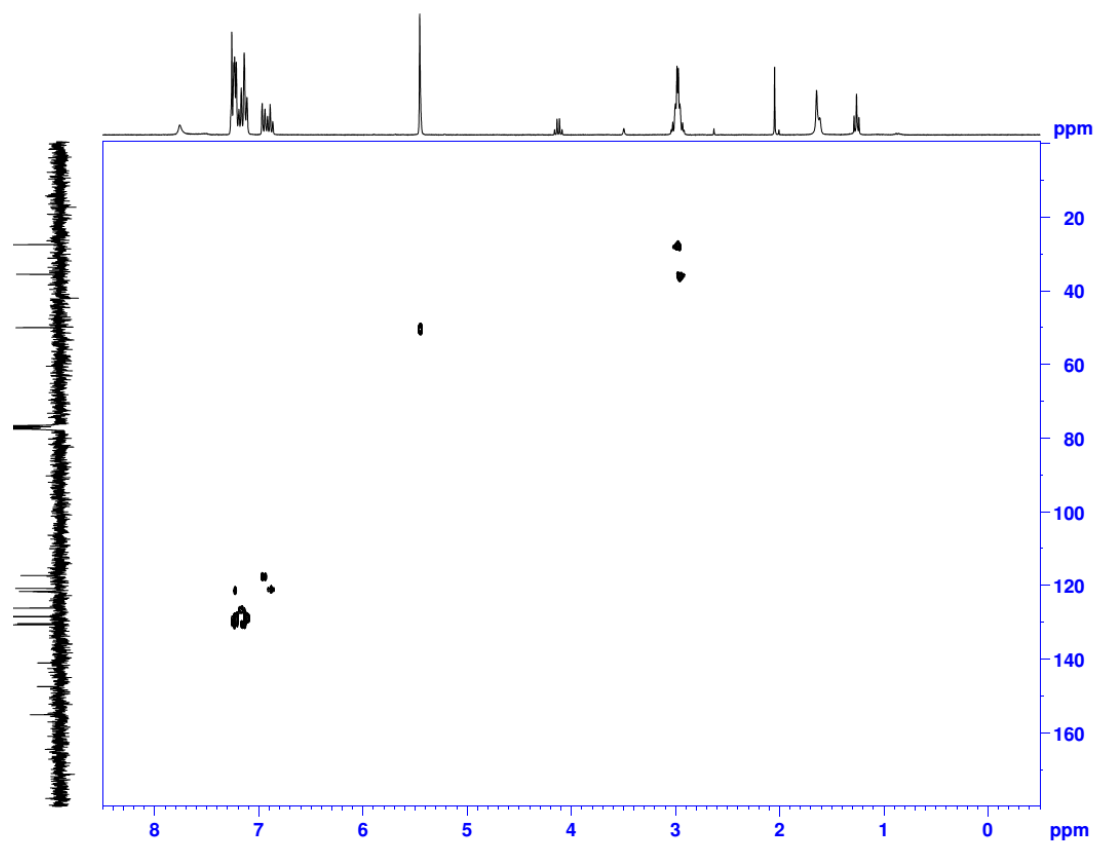

# Compound 11a

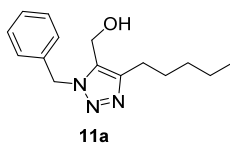

<sup>1</sup>H NMR (300 MHz, CDCl<sub>3</sub>)

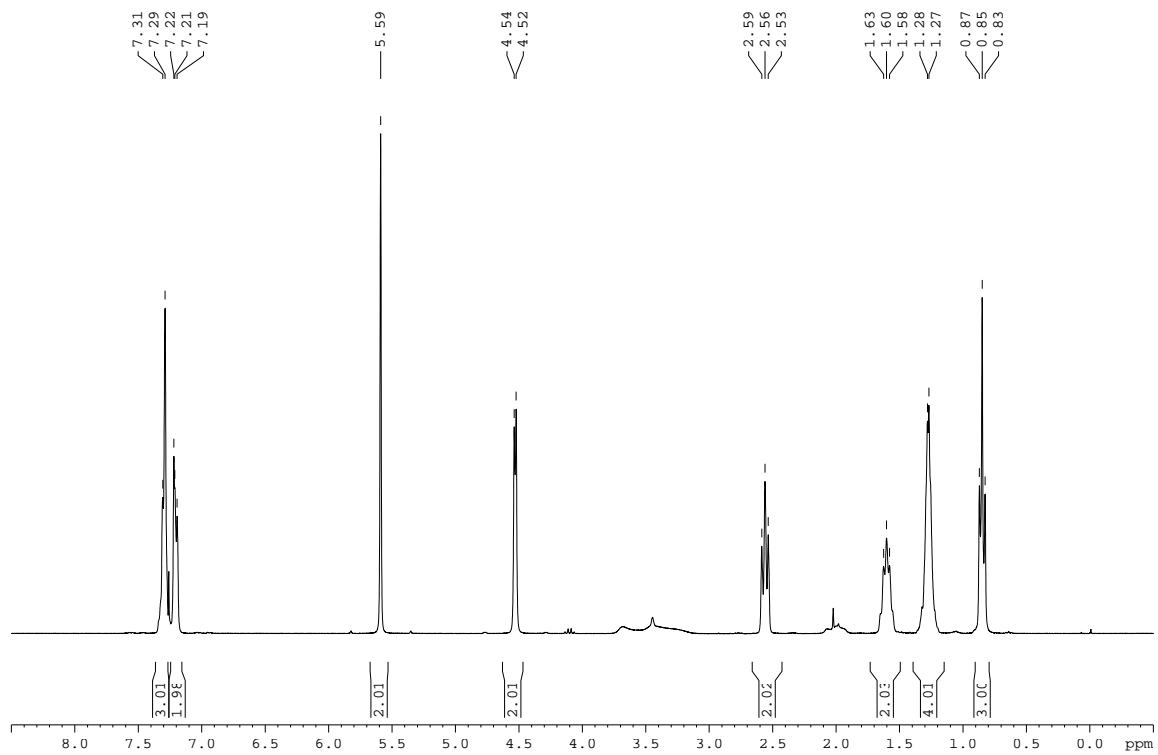

<sup>13</sup>C NMR (75 MHz, CDCl<sub>3</sub>)

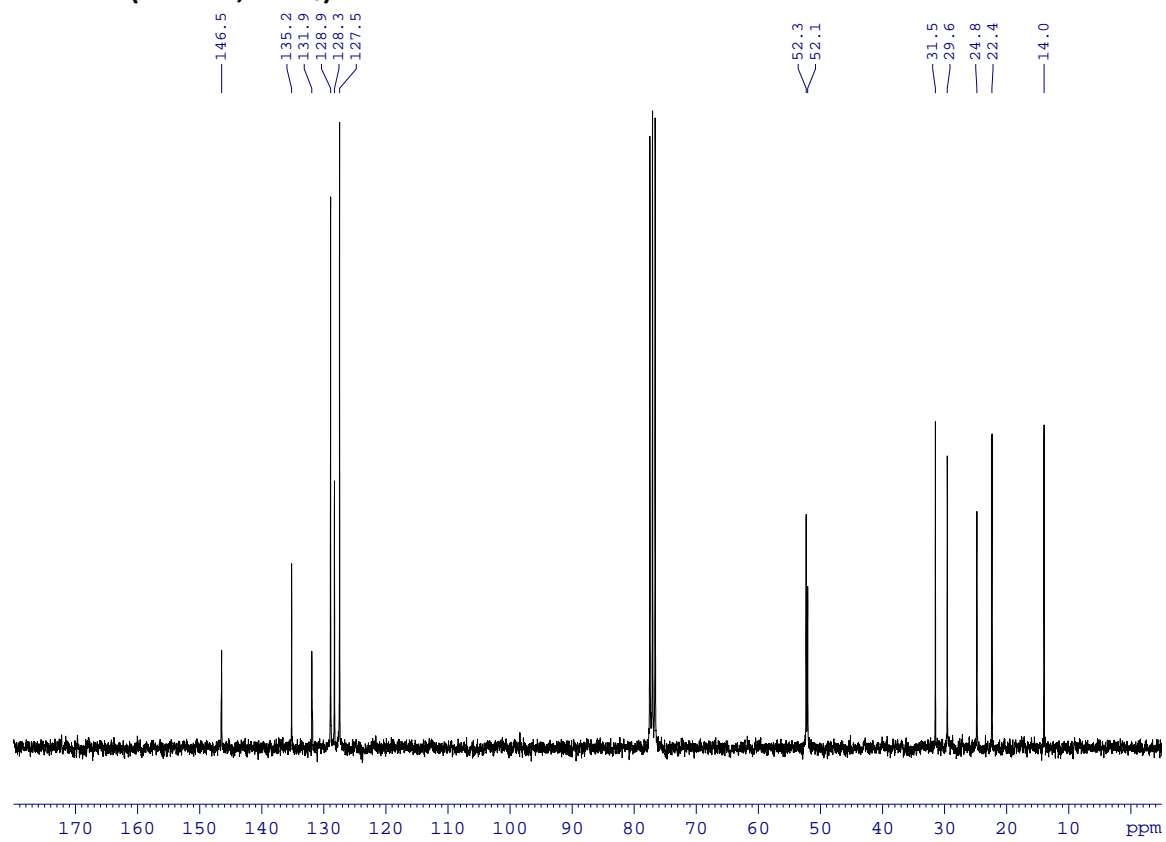

HSQC

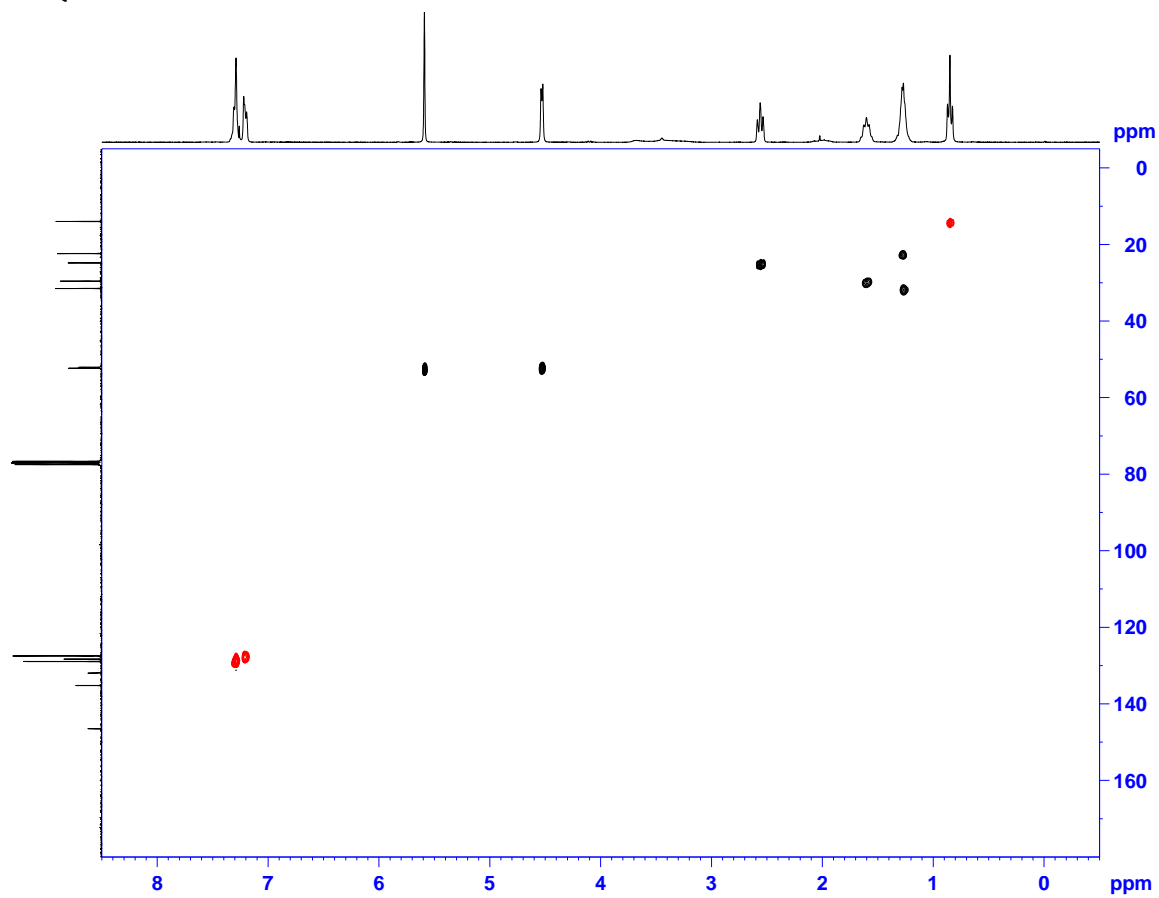



NOE

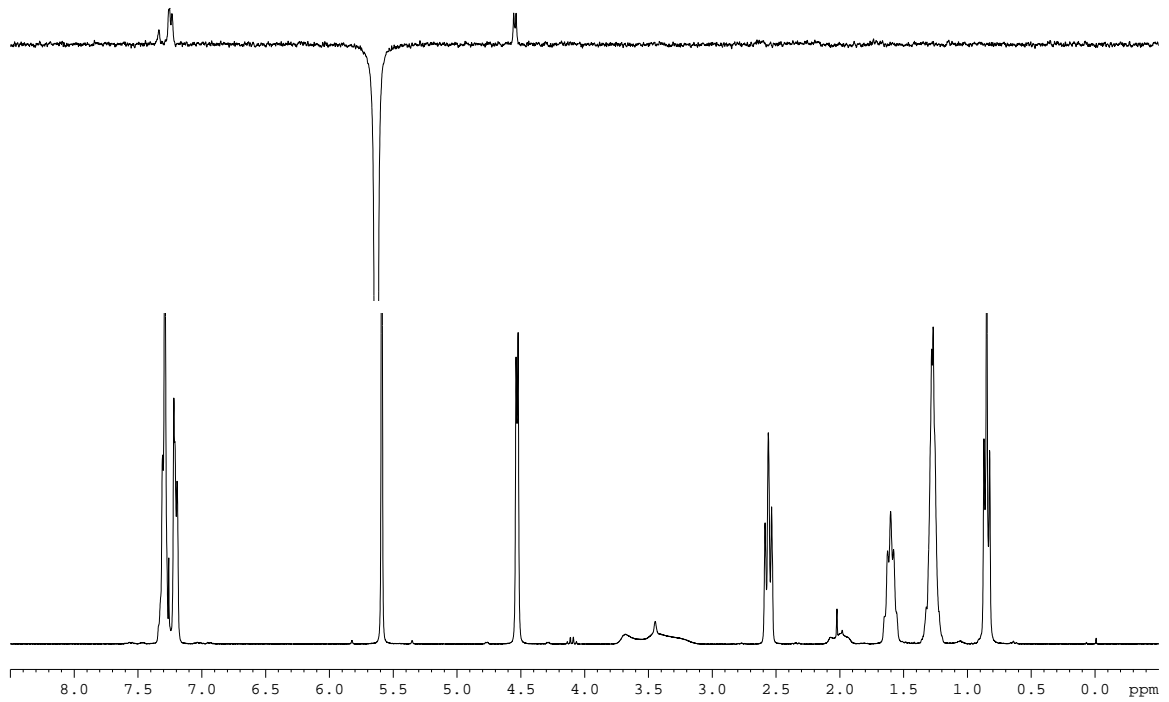

NOE

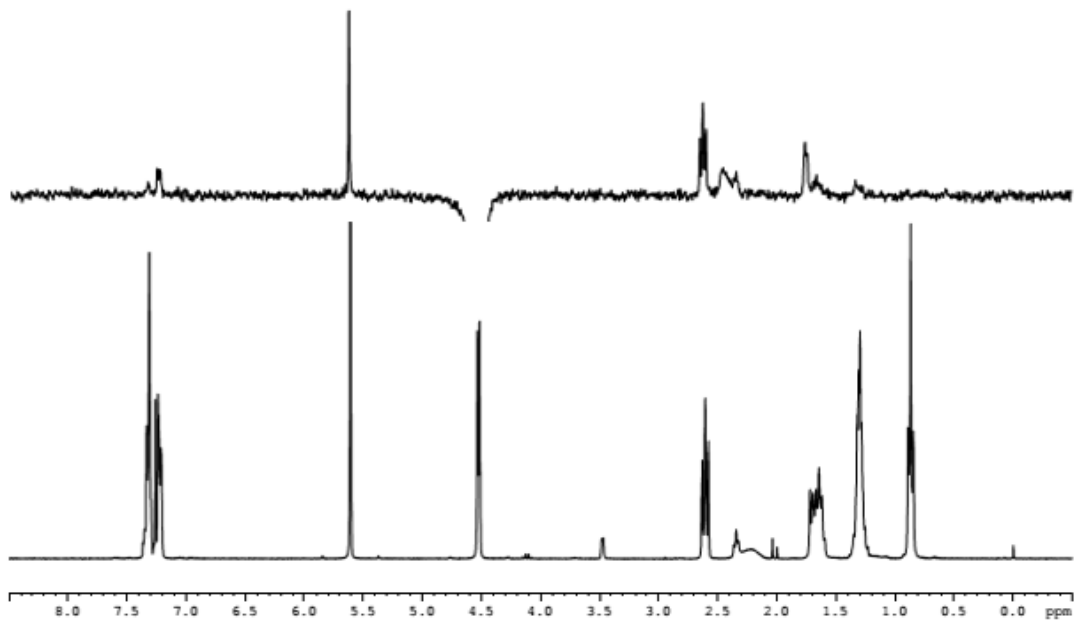

## Compound 11b

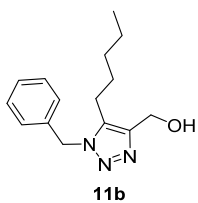

<sup>1</sup>H NMR (300 MHz, CDCl<sub>3</sub>)

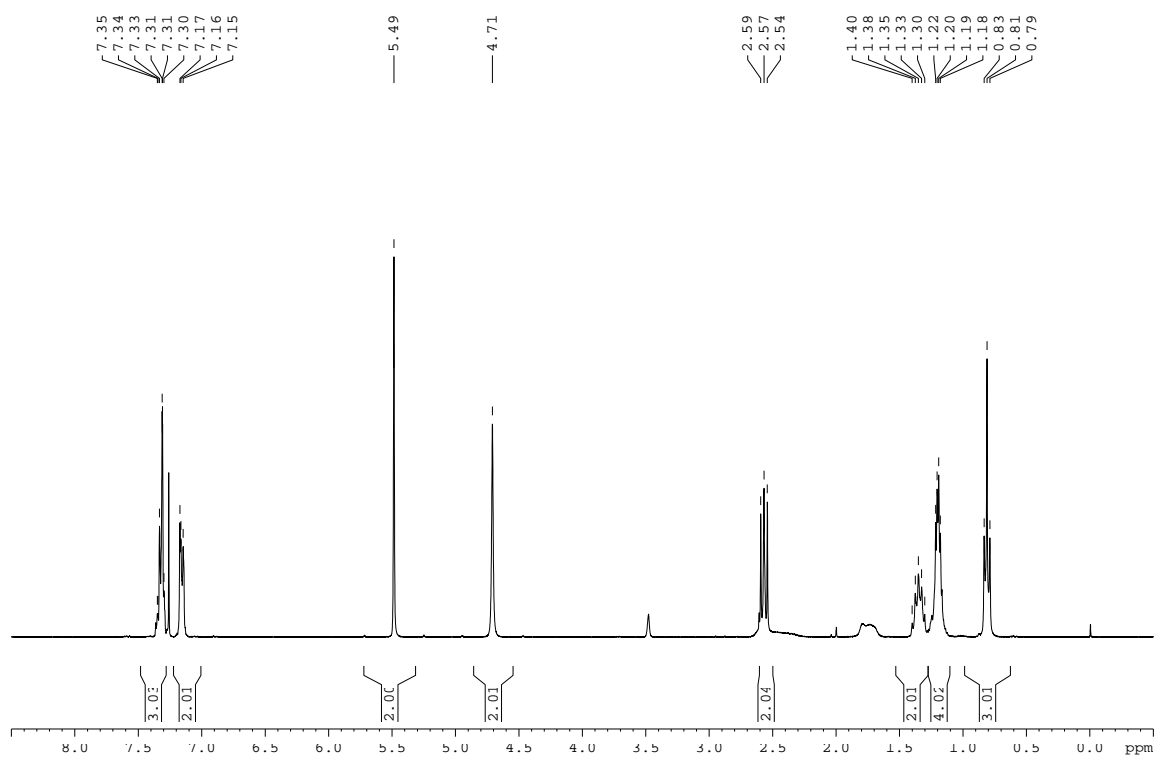

NOE

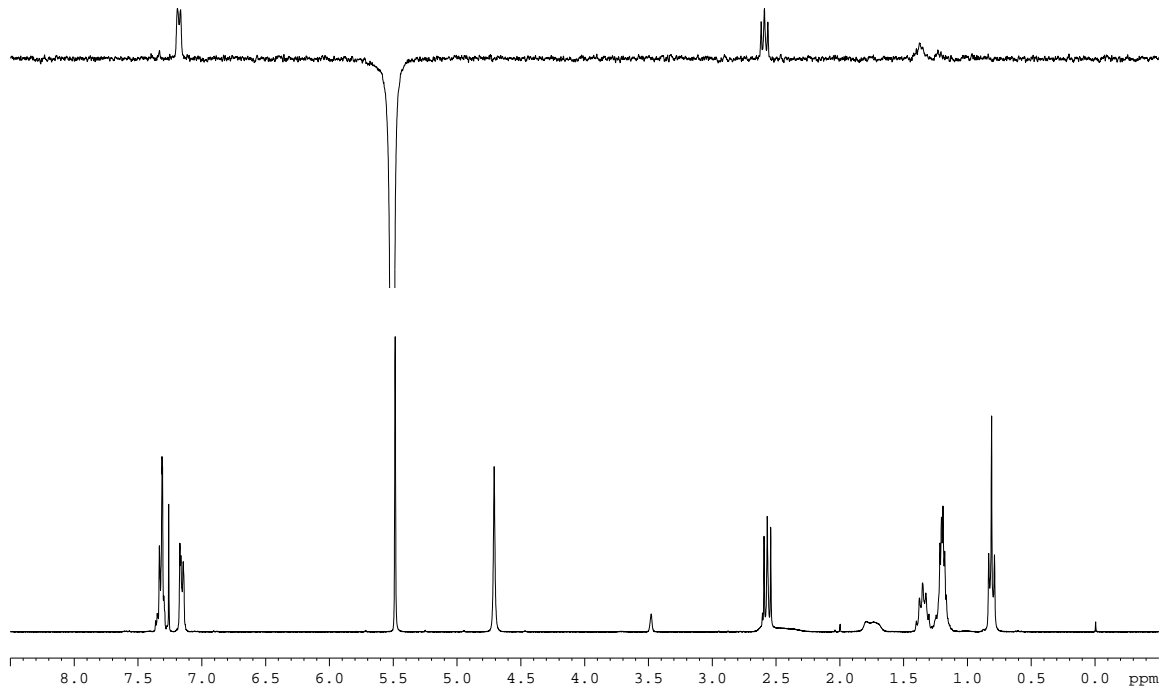

# Compound 11c

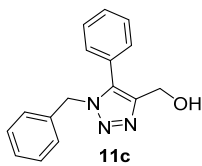

## <sup>1</sup>H NMR (300 MHz, CDCl<sub>3</sub>)

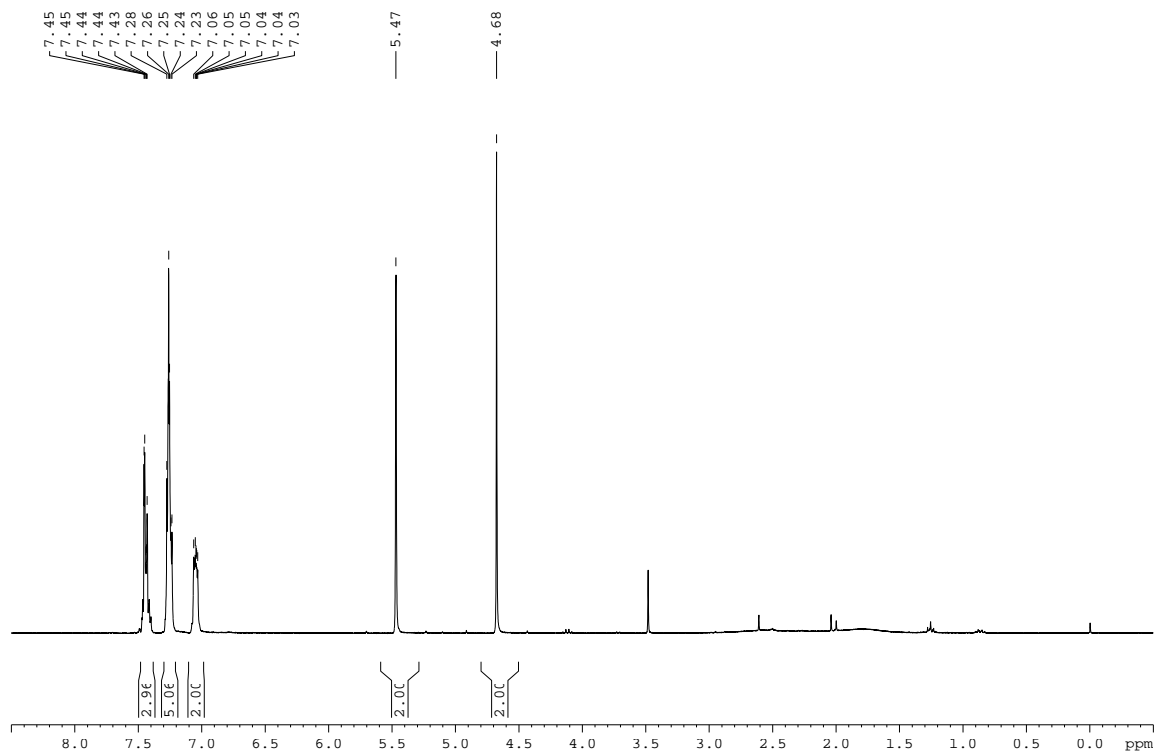

$^{13}\text{C}$  NMR (75 MHz,  $\text{CDCl}_3$ )

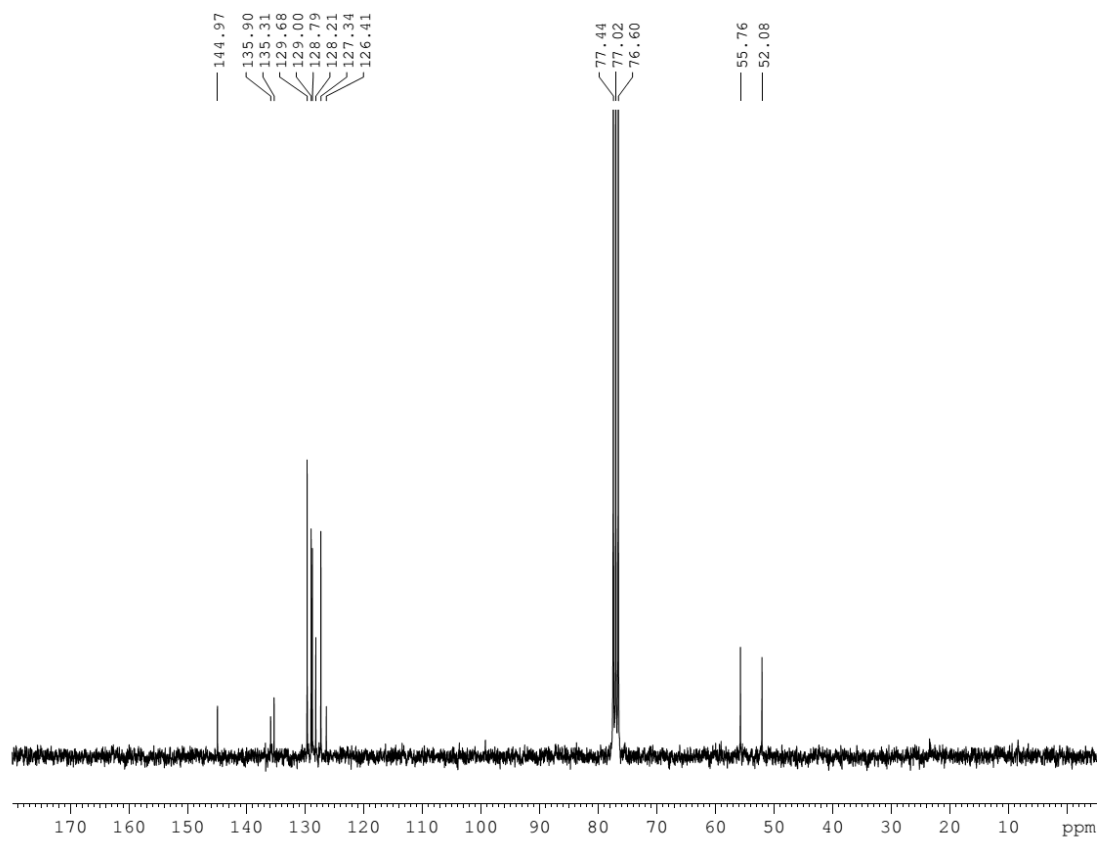

# Compound 11d

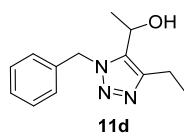

## <sup>1</sup>H NMR (300 MHz, CDCl<sub>3</sub>)

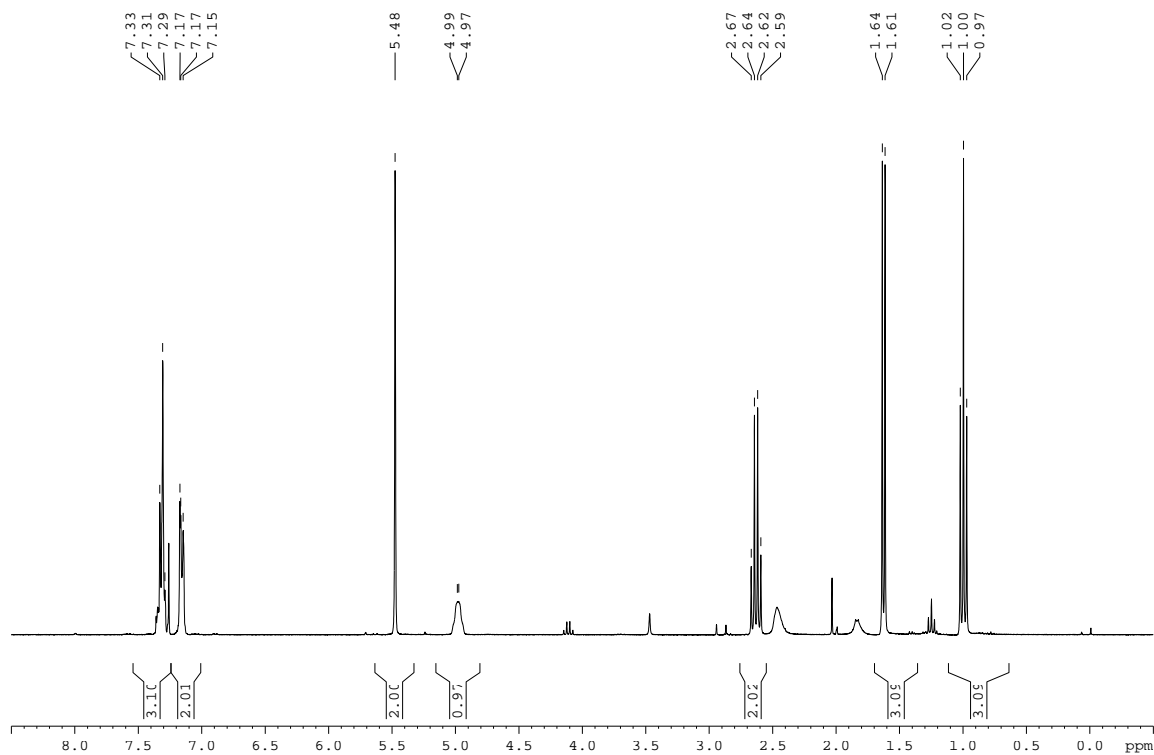

<sup>13</sup>C NMR (75 MHz, CDCl<sub>3</sub>)

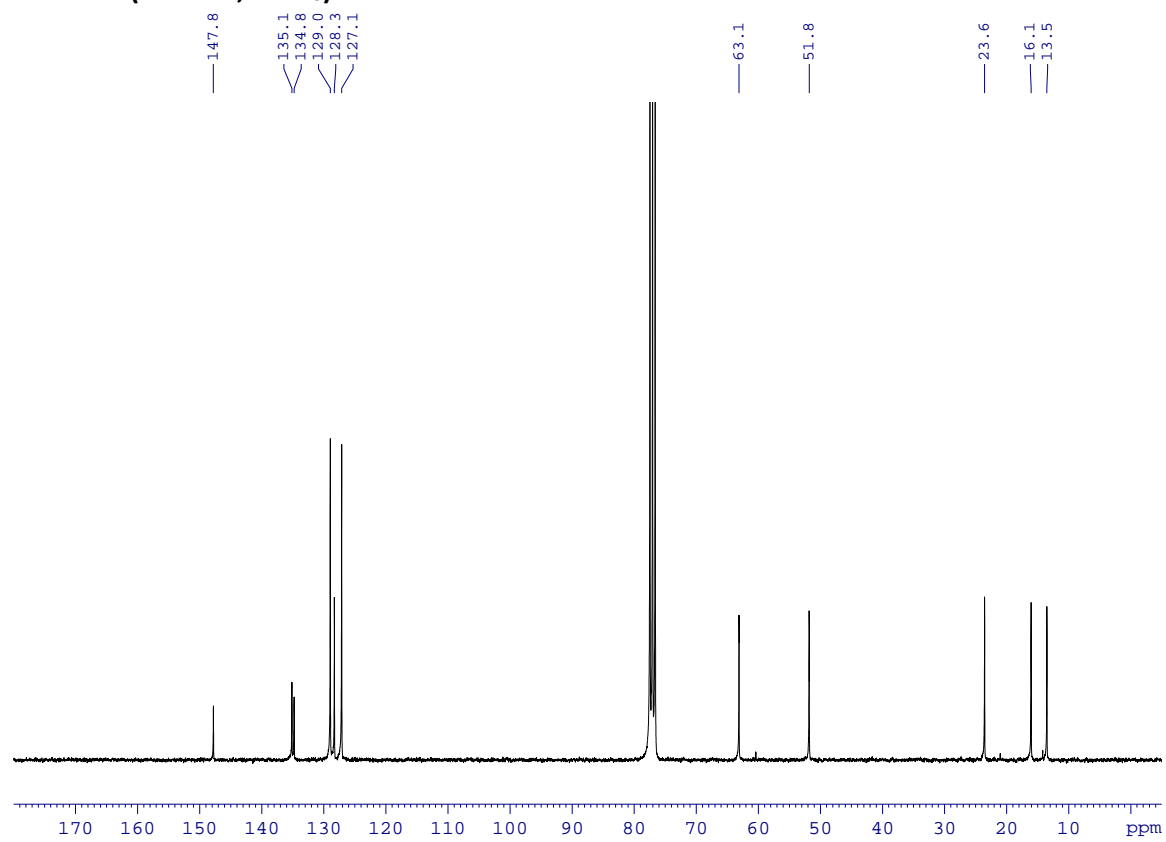

HSQC

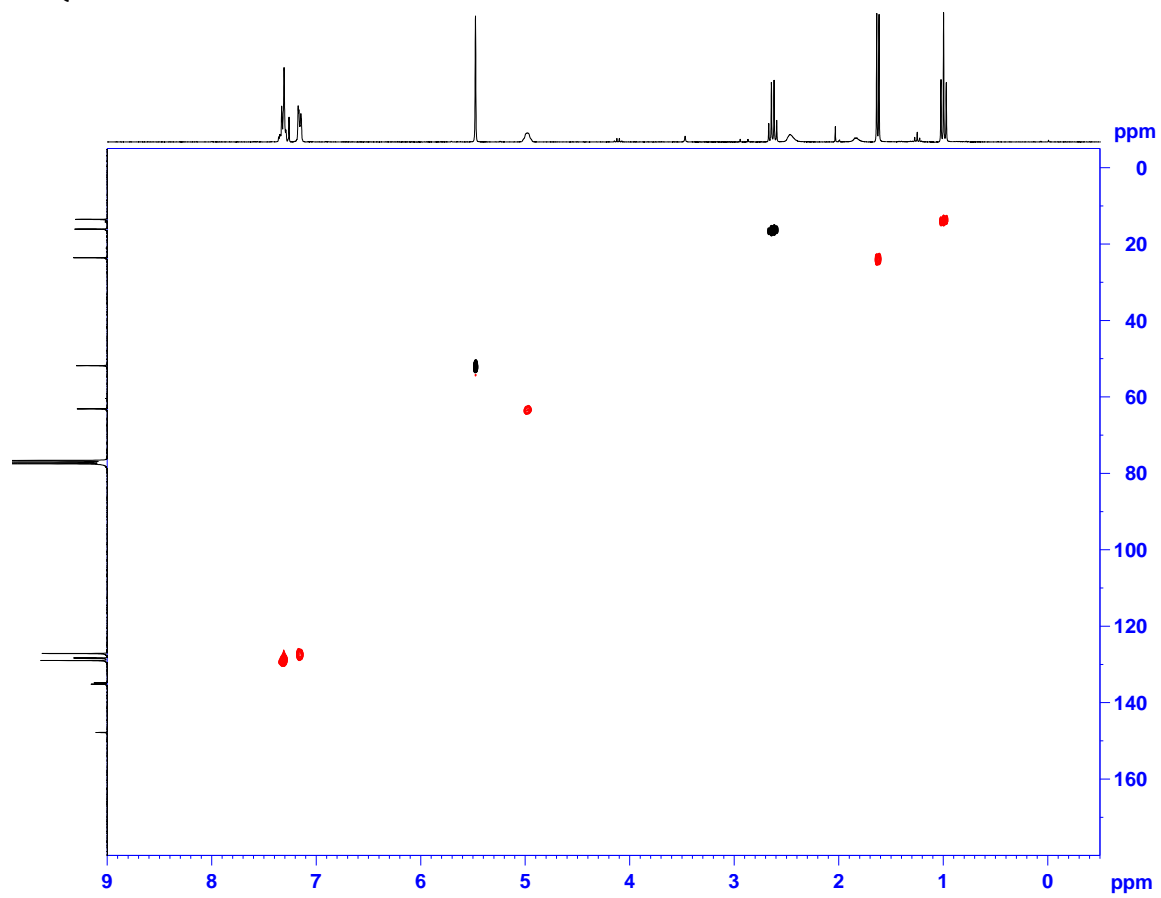



NOE

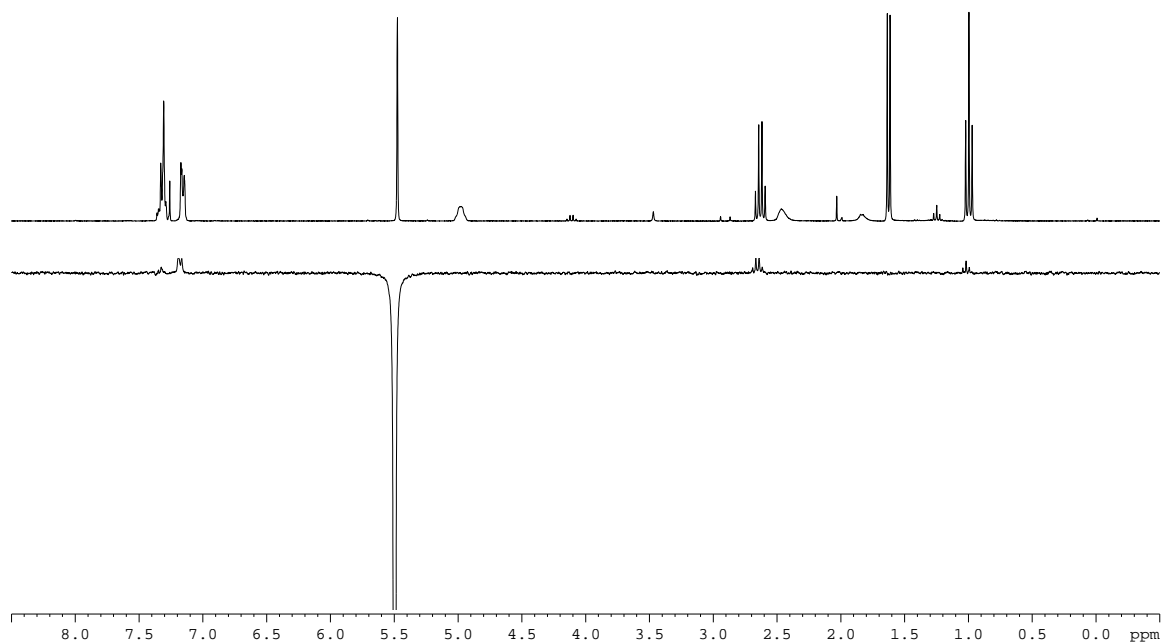

# Compound 11e

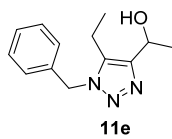

<sup>1</sup>H NMR (300 MHz, CDCl<sub>3</sub>)

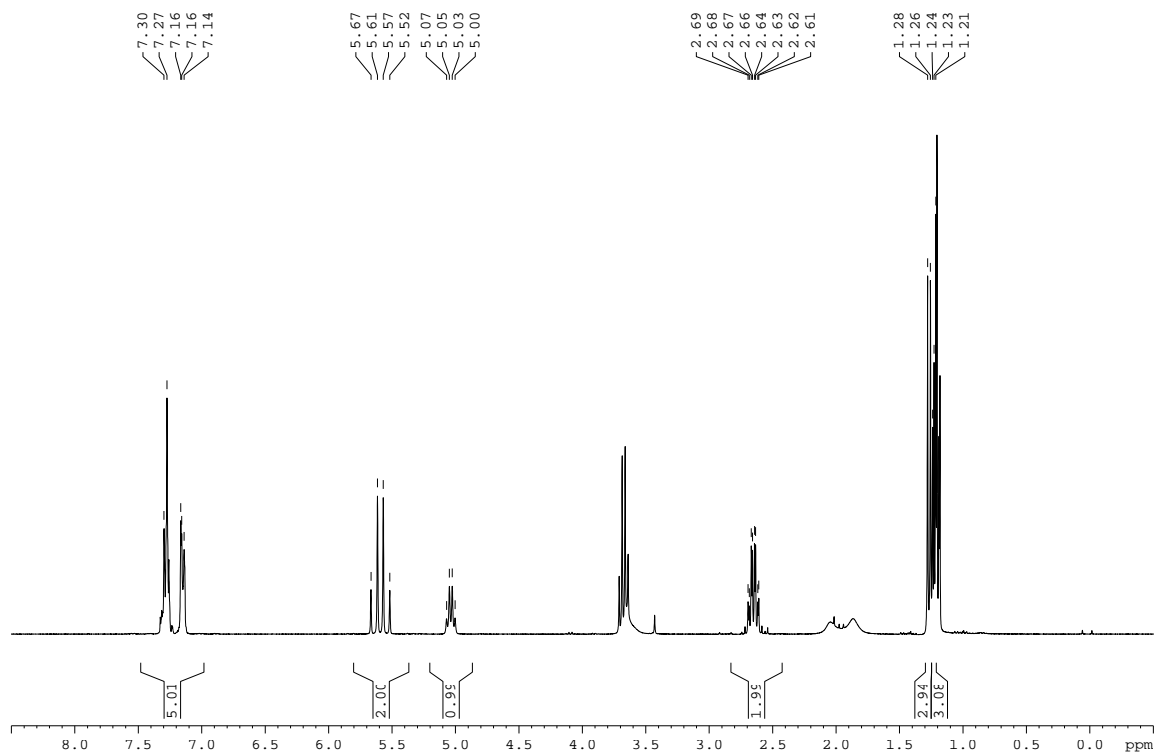

<sup>13</sup>C NMR (75 MHz, CDCl<sub>3</sub>)

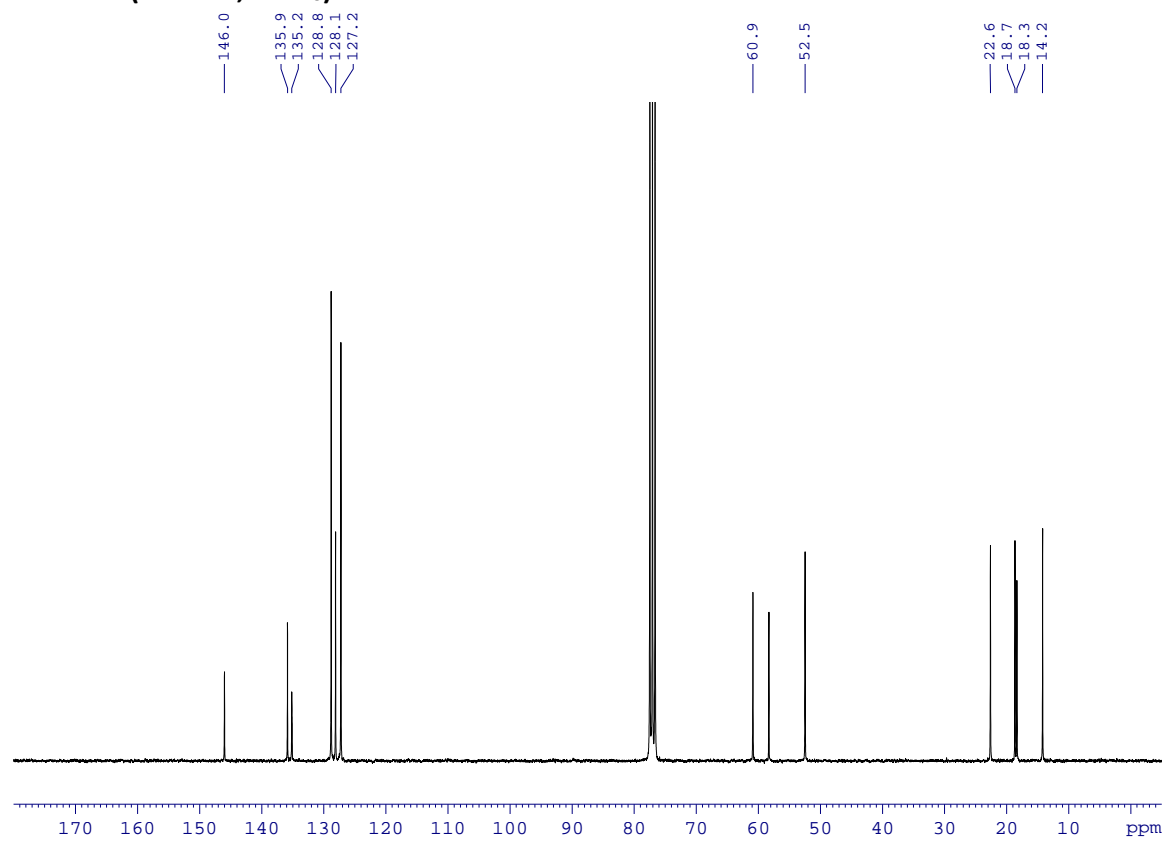

# HSQC

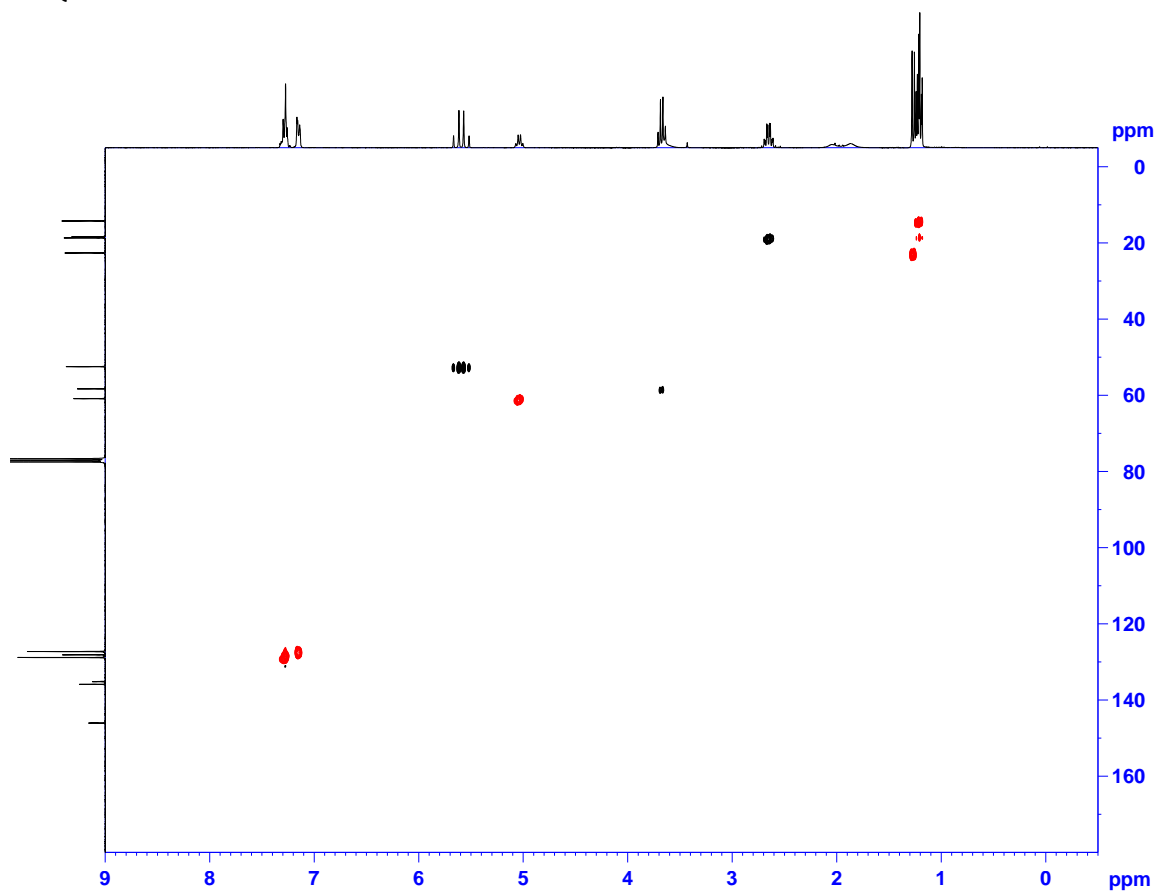

# Compound 13a

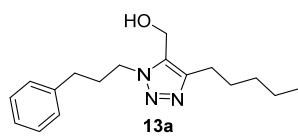

## <sup>1</sup>H NMR (300 MHz, CDCl<sub>3</sub>)

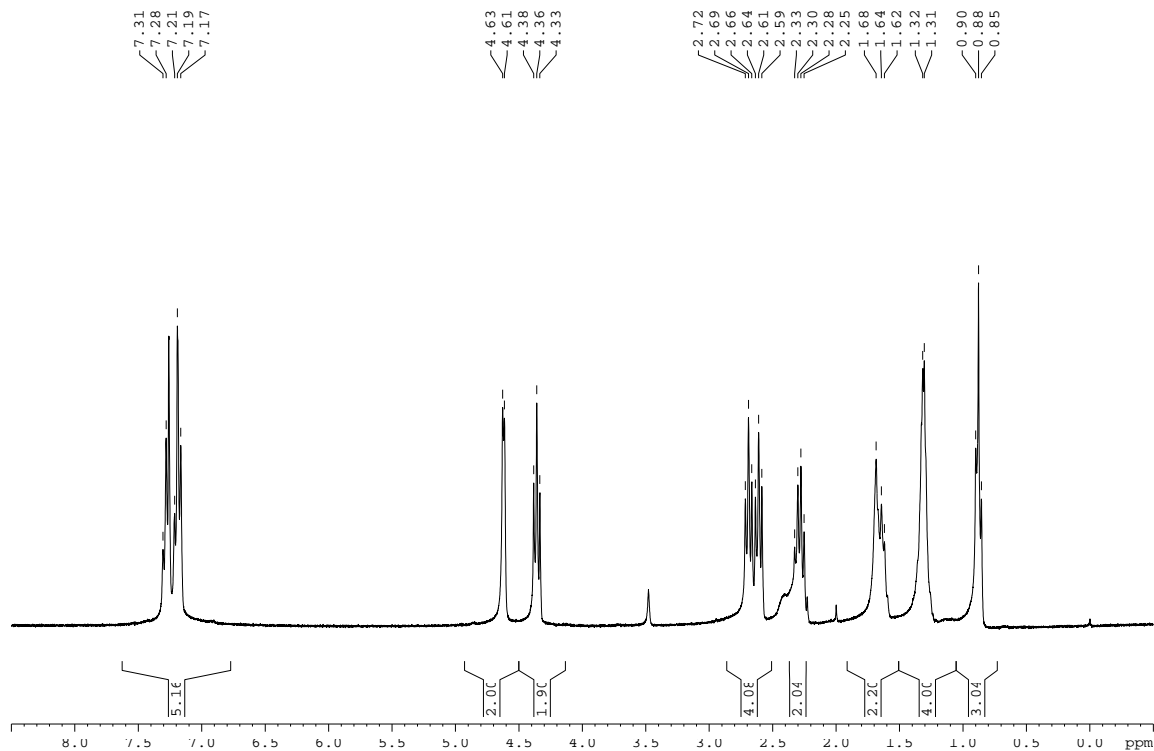

**$^{13}\text{C}$  NMR (75 MHz,  $\text{CDCl}_3$ )**

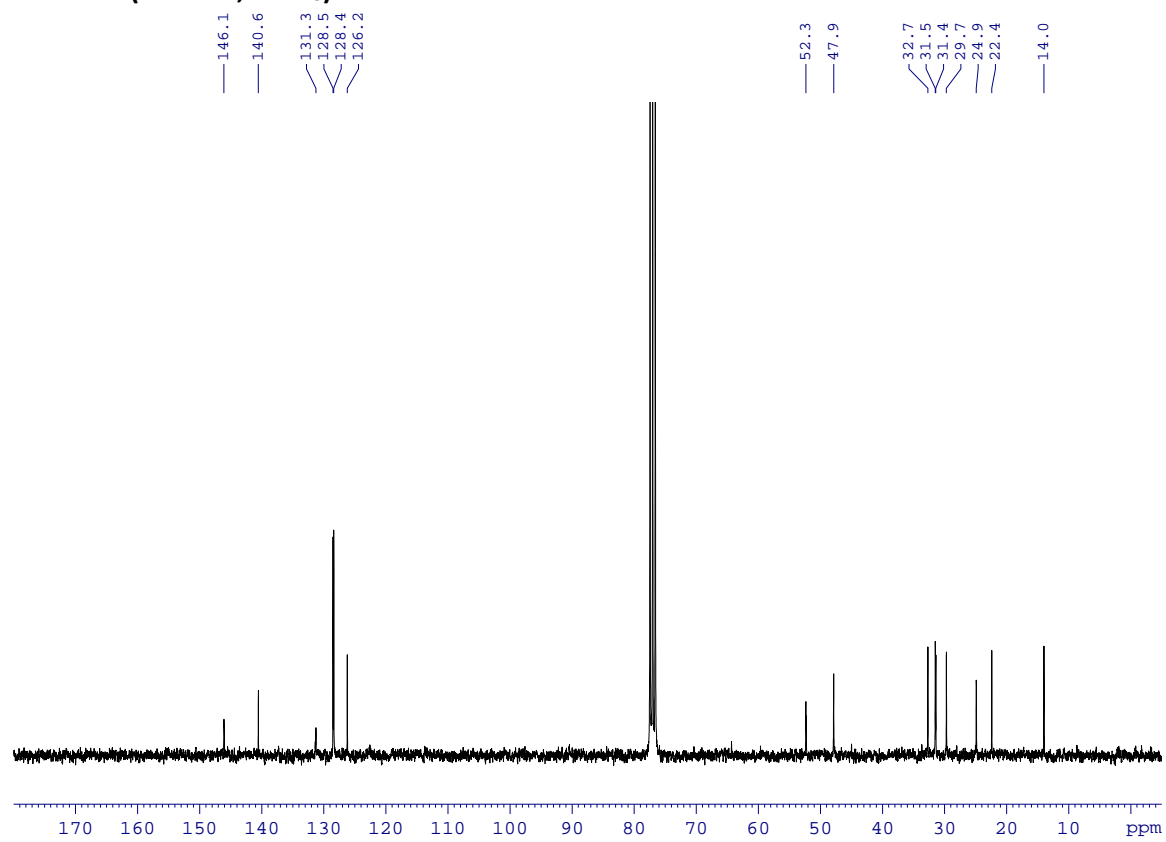

HSQC

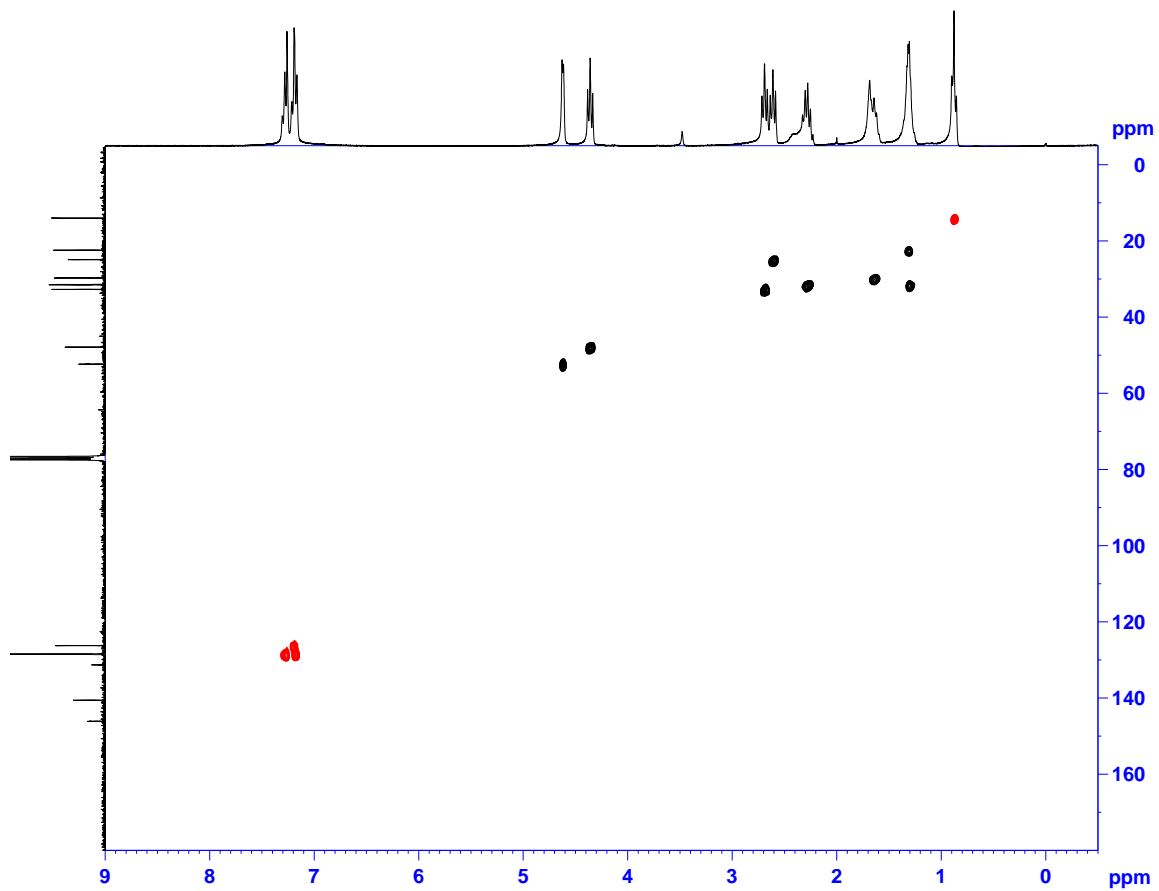

# Compound 13b

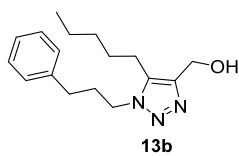

## <sup>1</sup>H NMR (300 MHz, CDCl<sub>3</sub>)

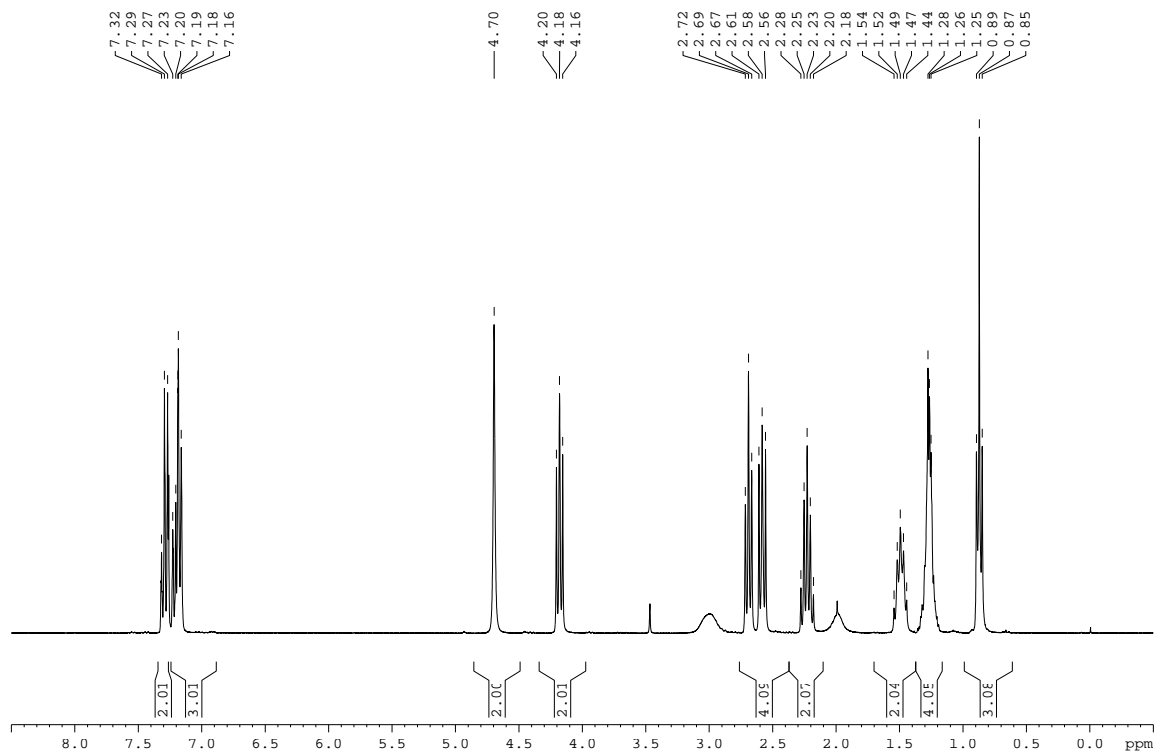



<sup>13</sup>C NMR (75 MHz, CDCl<sub>3</sub>)

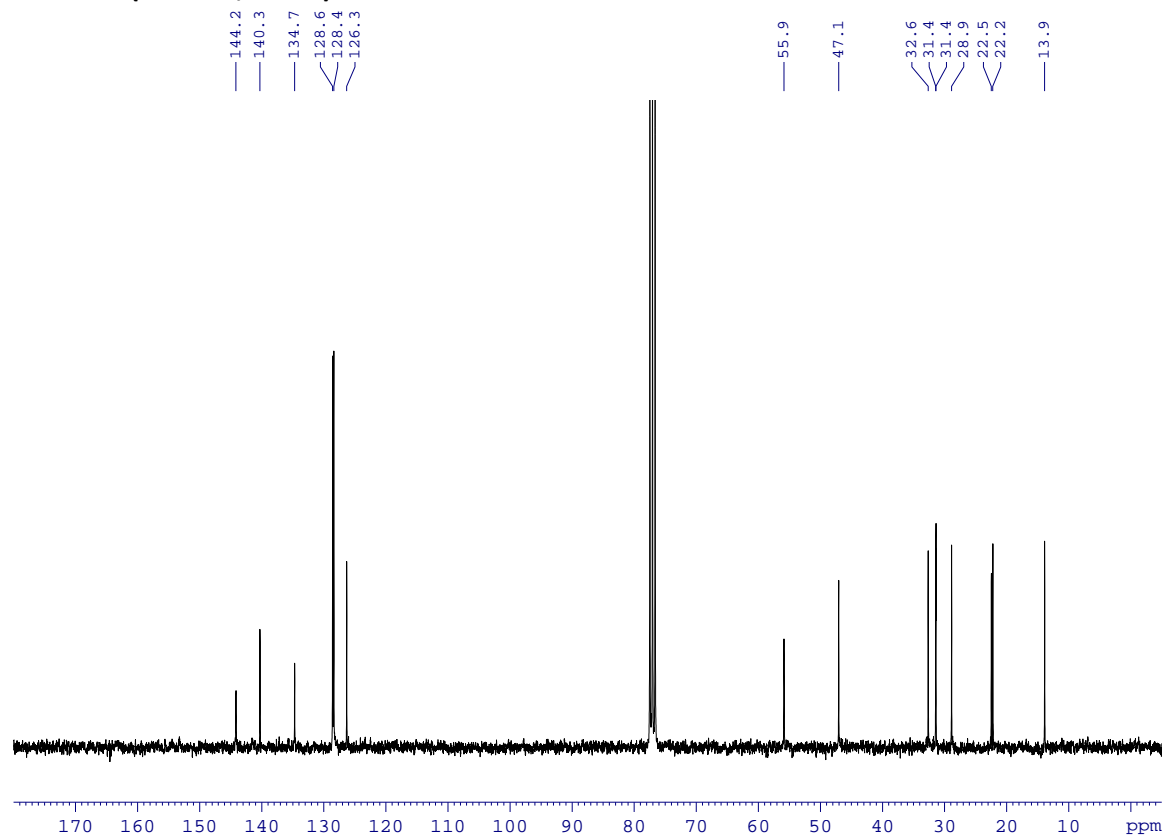

# HSQC

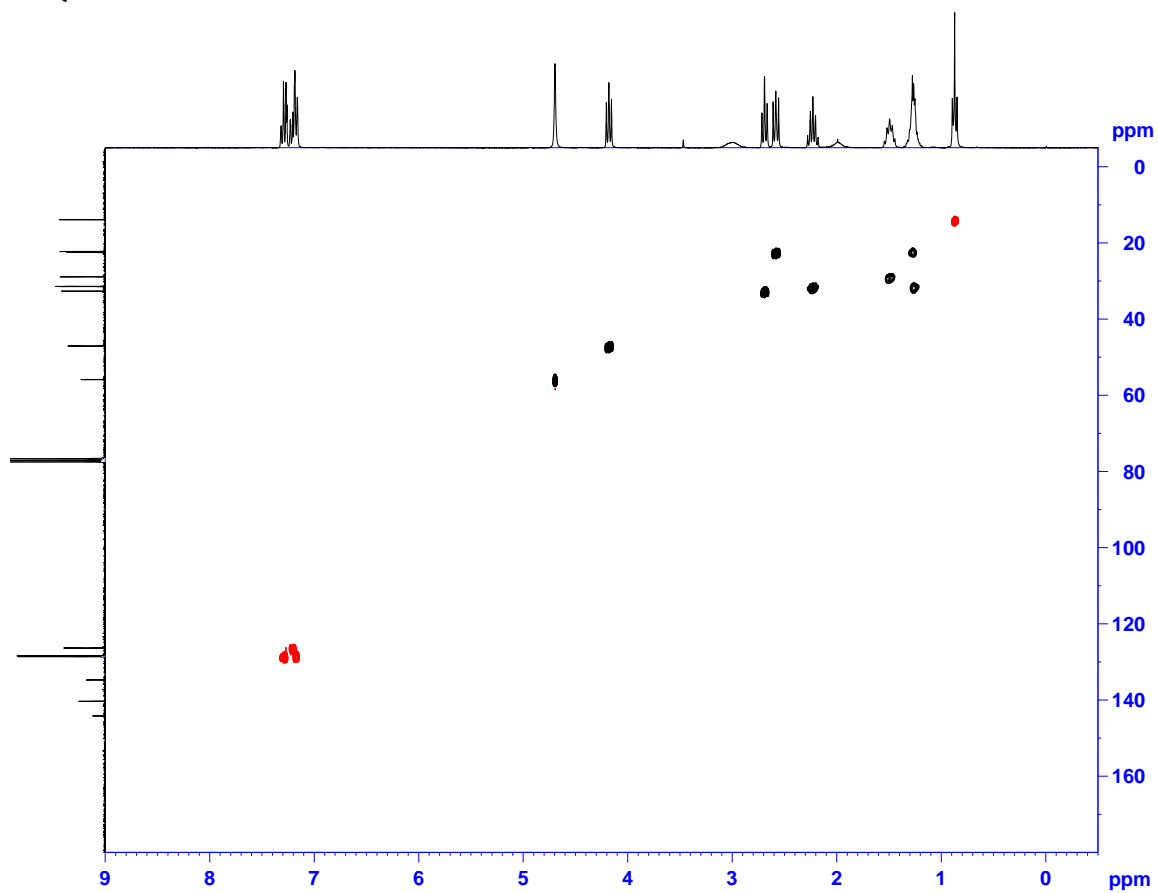

# NOE

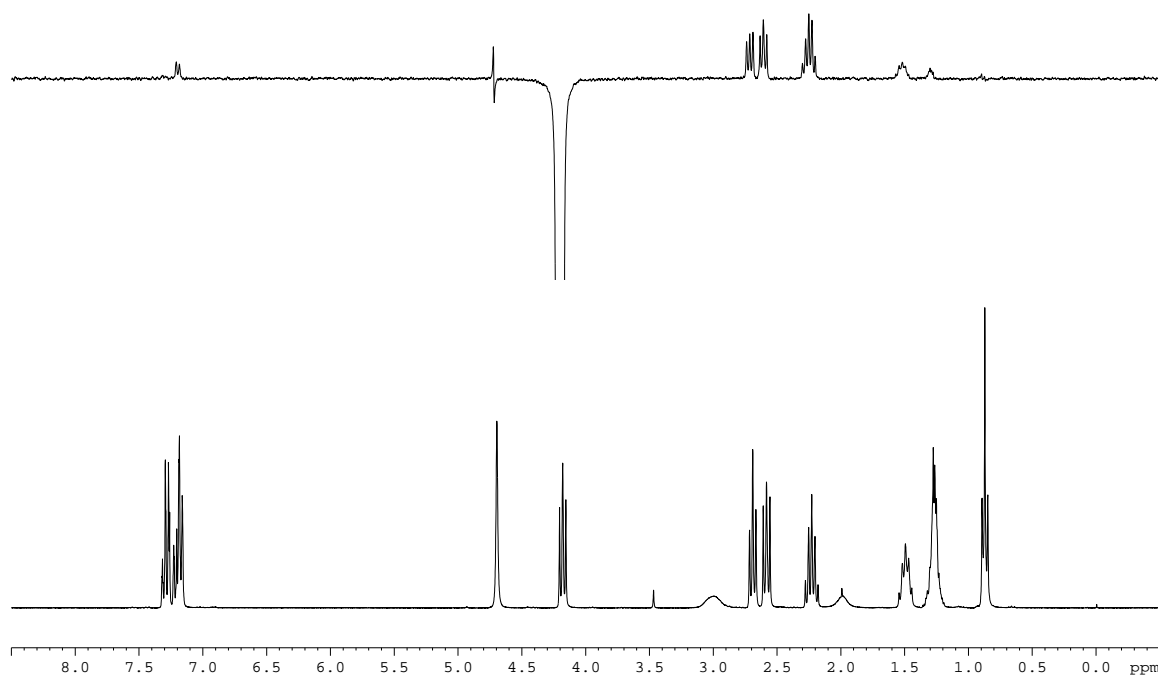

# Compound 13c

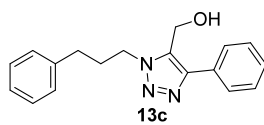

## <sup>1</sup>H NMR (300 MHz, CDCl<sub>3</sub>)

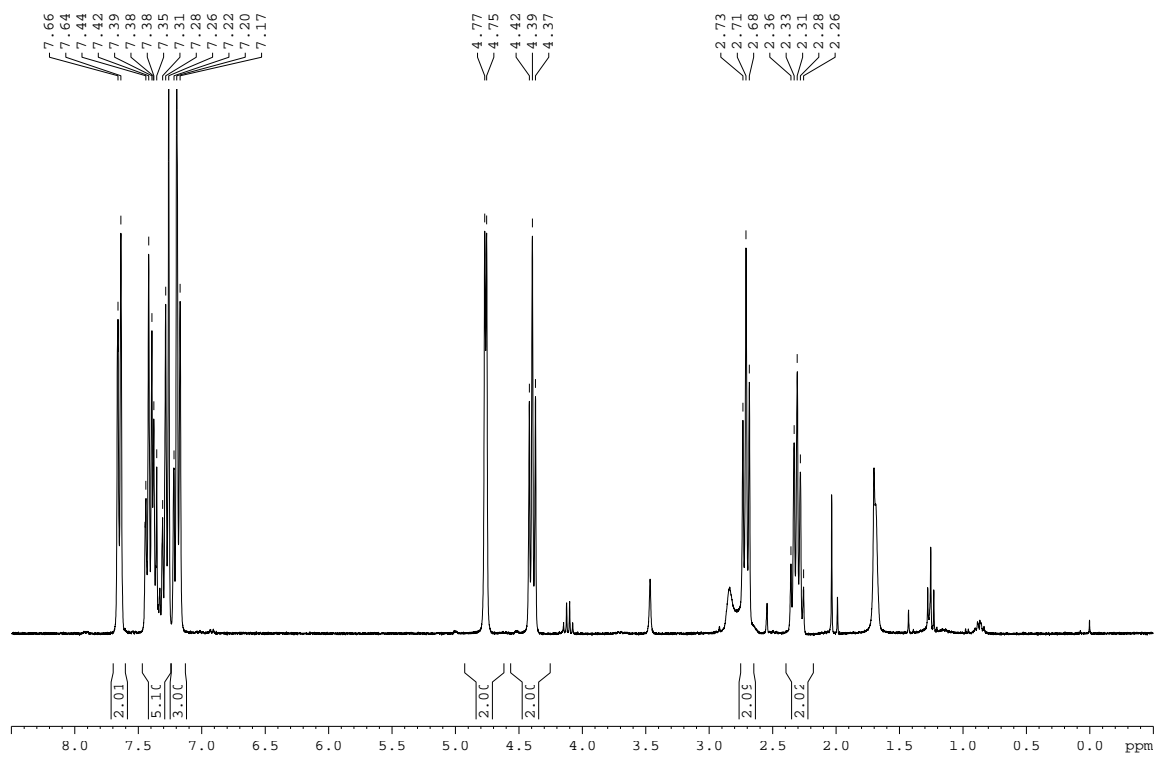

**$^{13}\text{C}$  NMR (75 MHz,  $\text{CDCl}_3$ )**

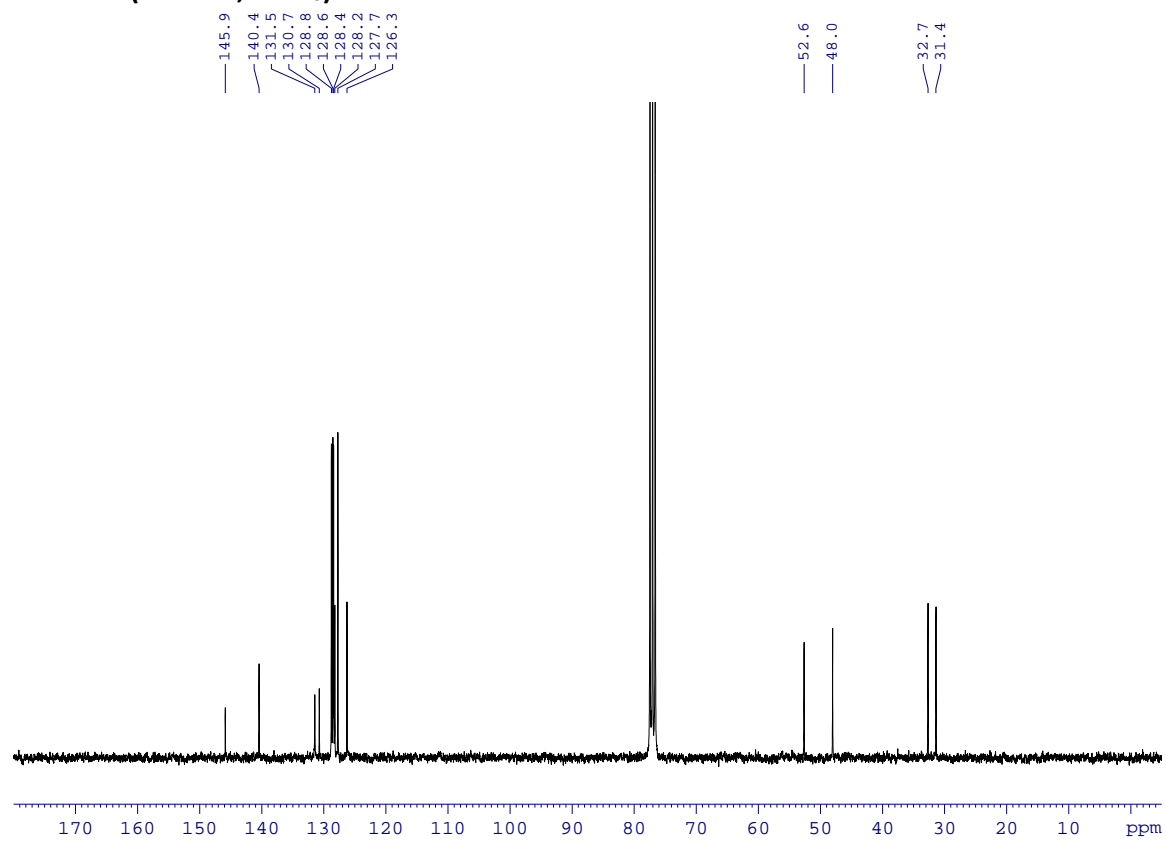

HSQC

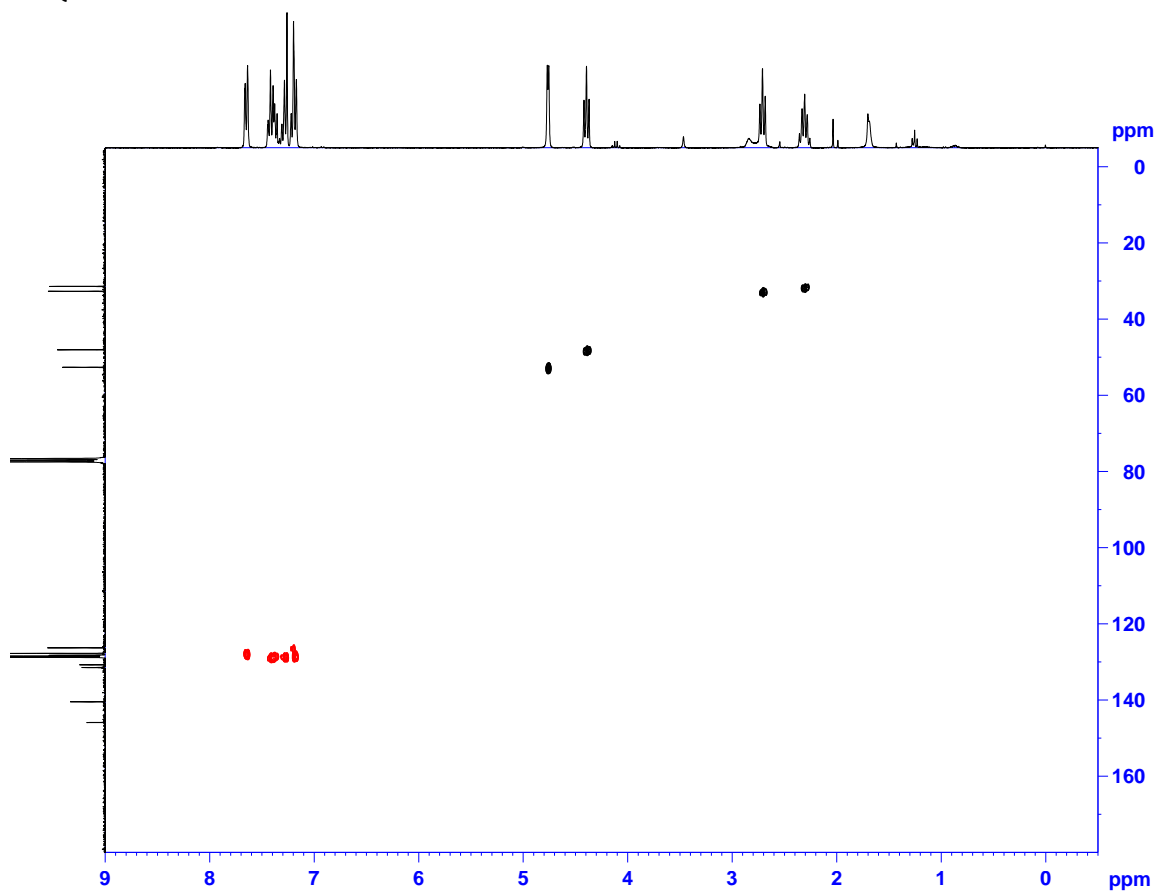

NOE

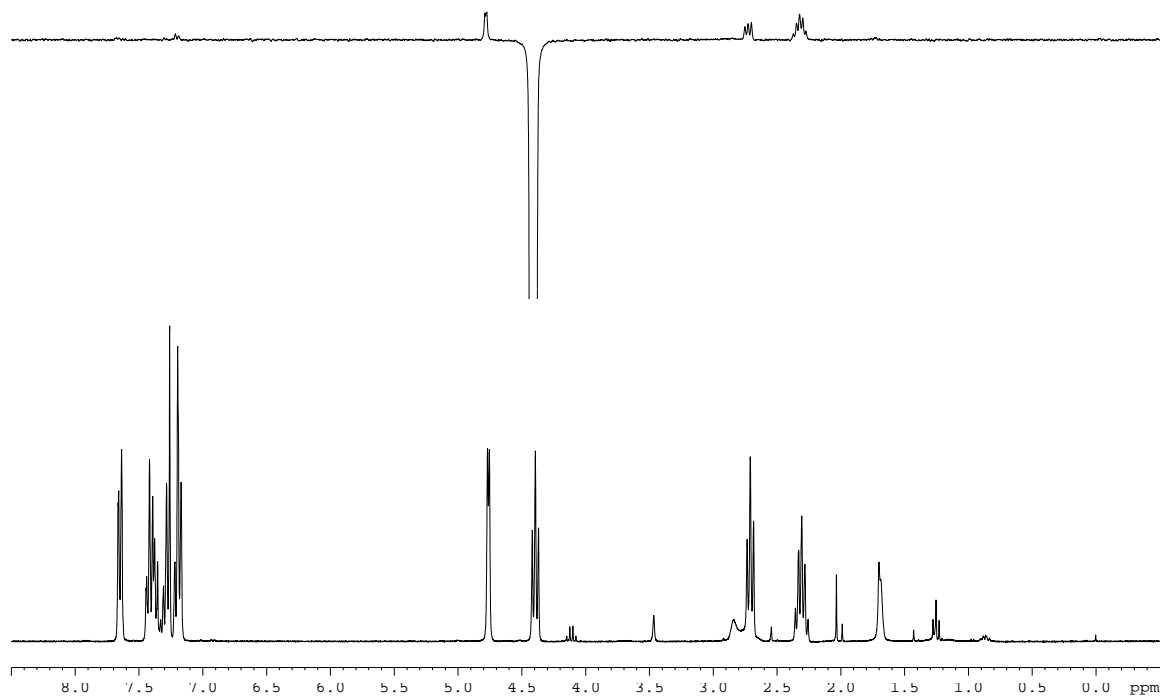

# Compound 13d

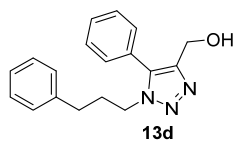

## <sup>1</sup>H NMR (300 MHz, CDCl<sub>3</sub>)

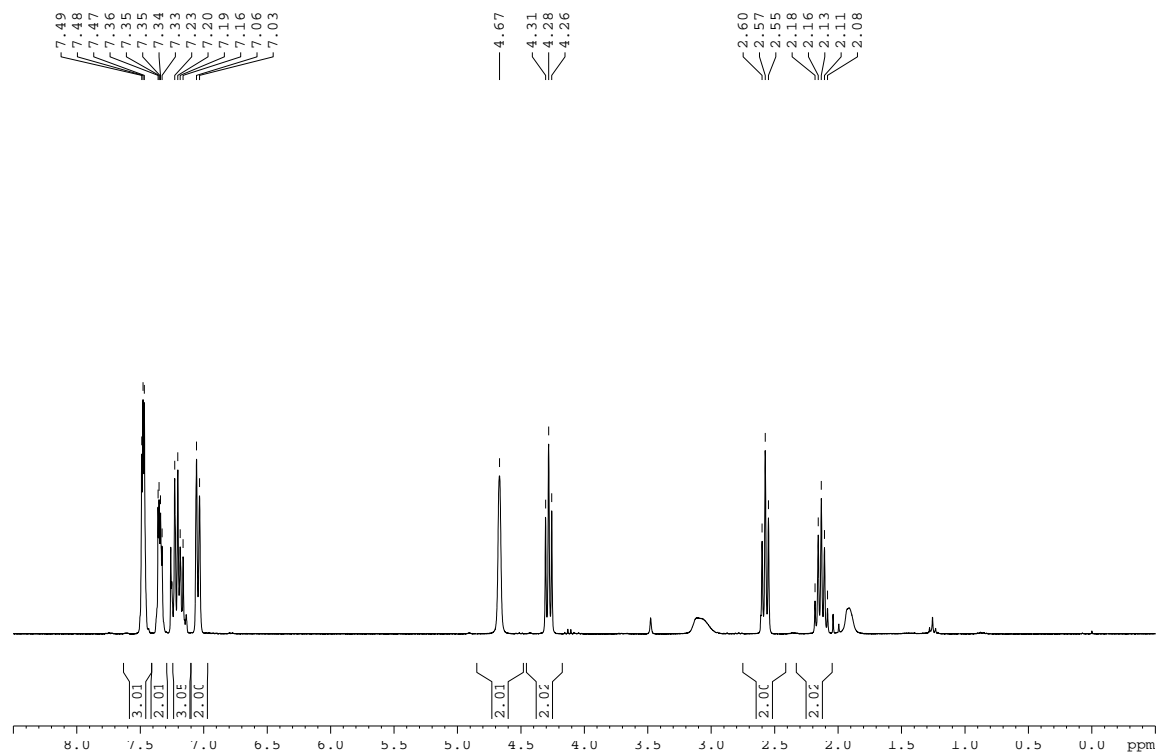

$^{13}\text{C}$  NMR (75 MHz,  $\text{CDCl}_3$ )

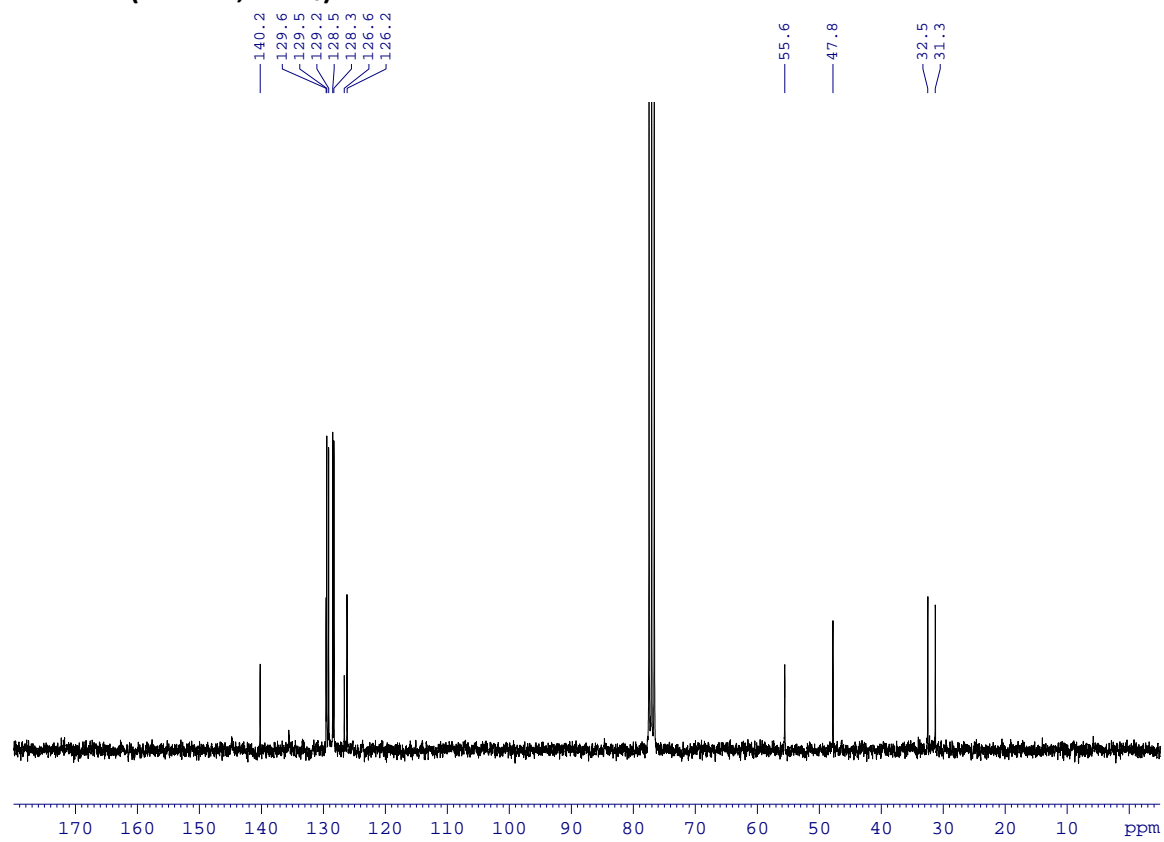



HSQC

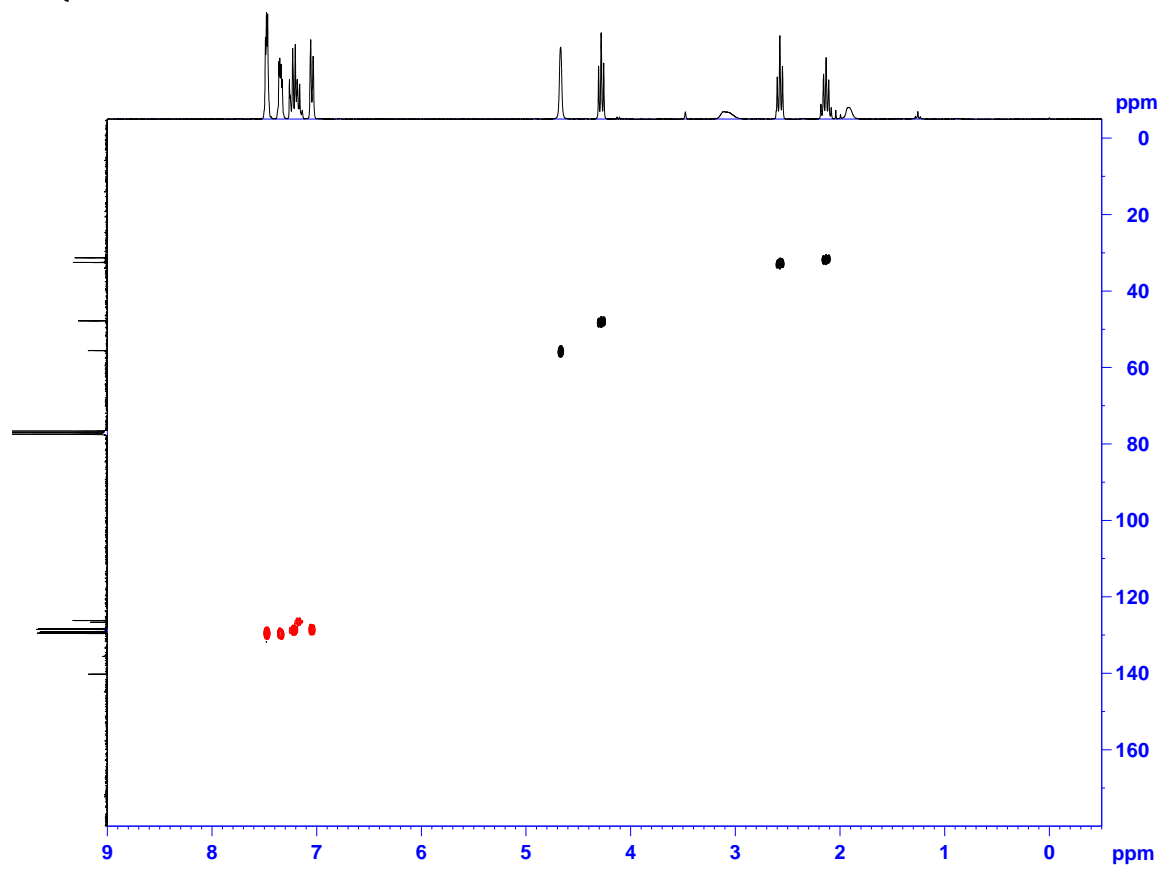

# Compound 13e

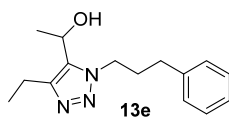

## <sup>1</sup>H NMR (300 MHz, CDCl<sub>3</sub>)

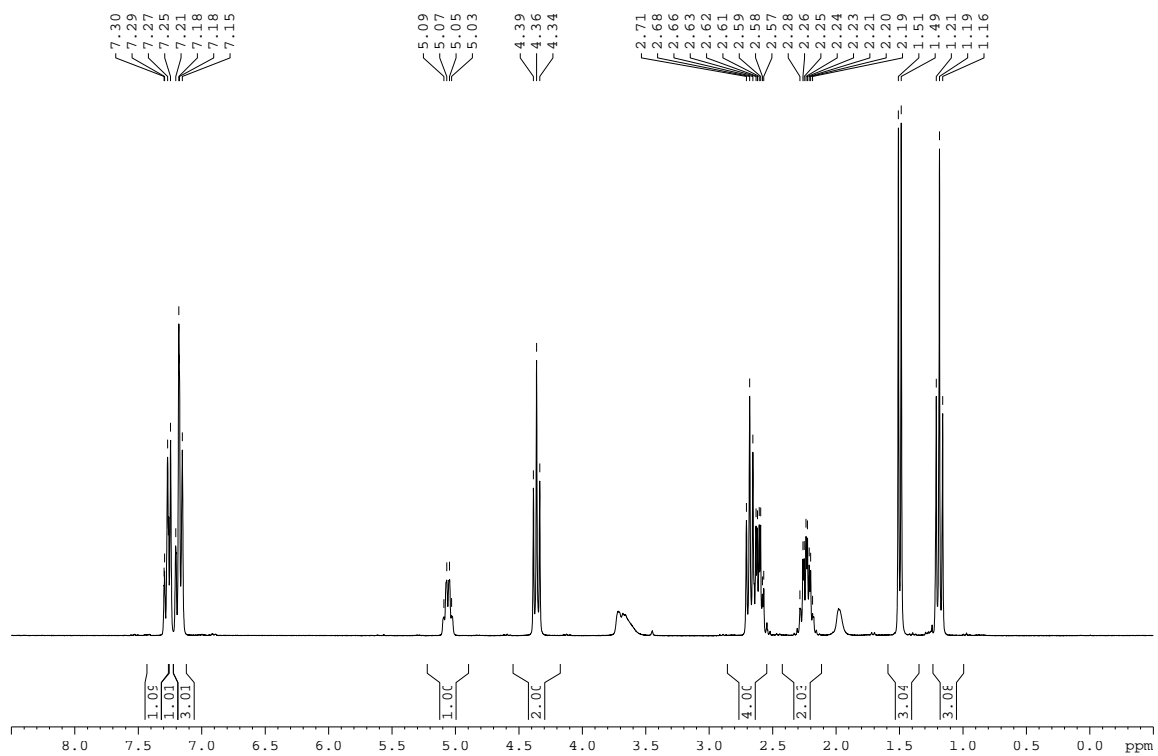

**$^{13}\text{C}$  NMR (75 MHz,  $\text{CDCl}_3$ )**

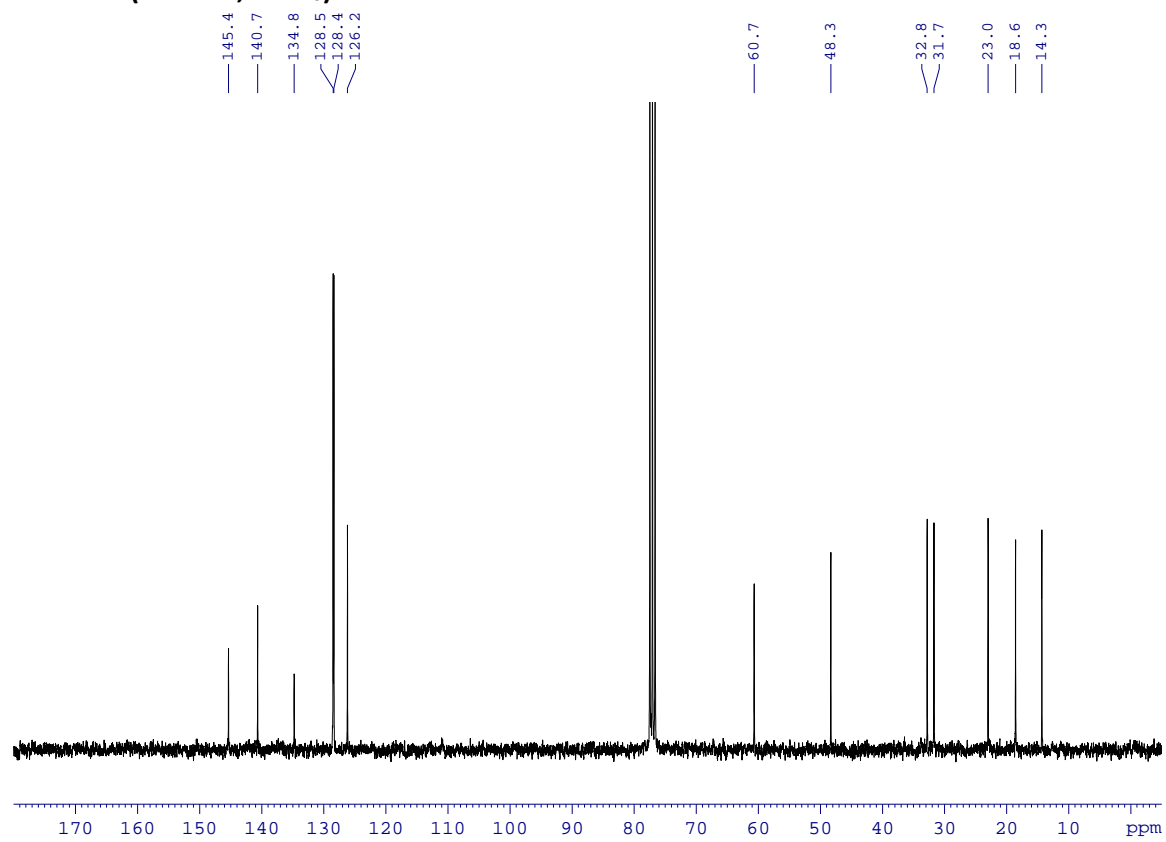

# HSQC

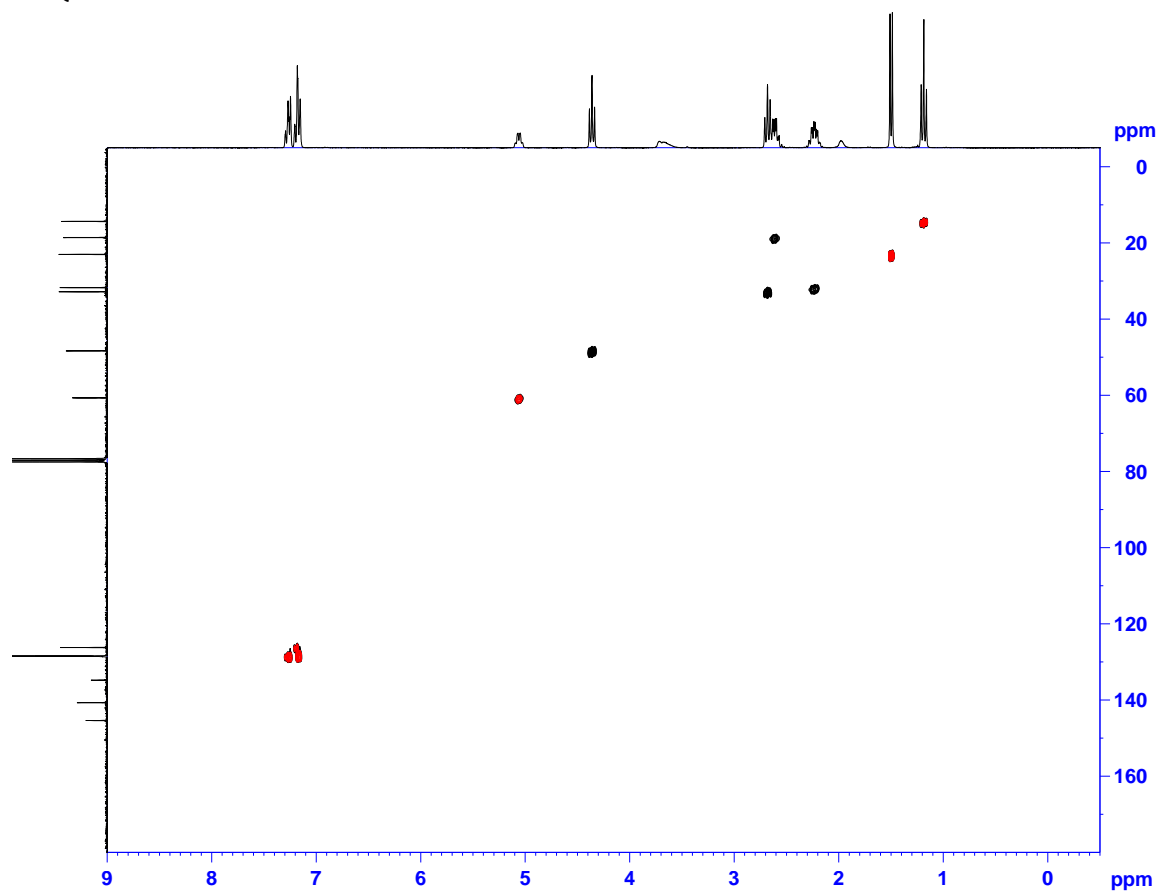

NOE

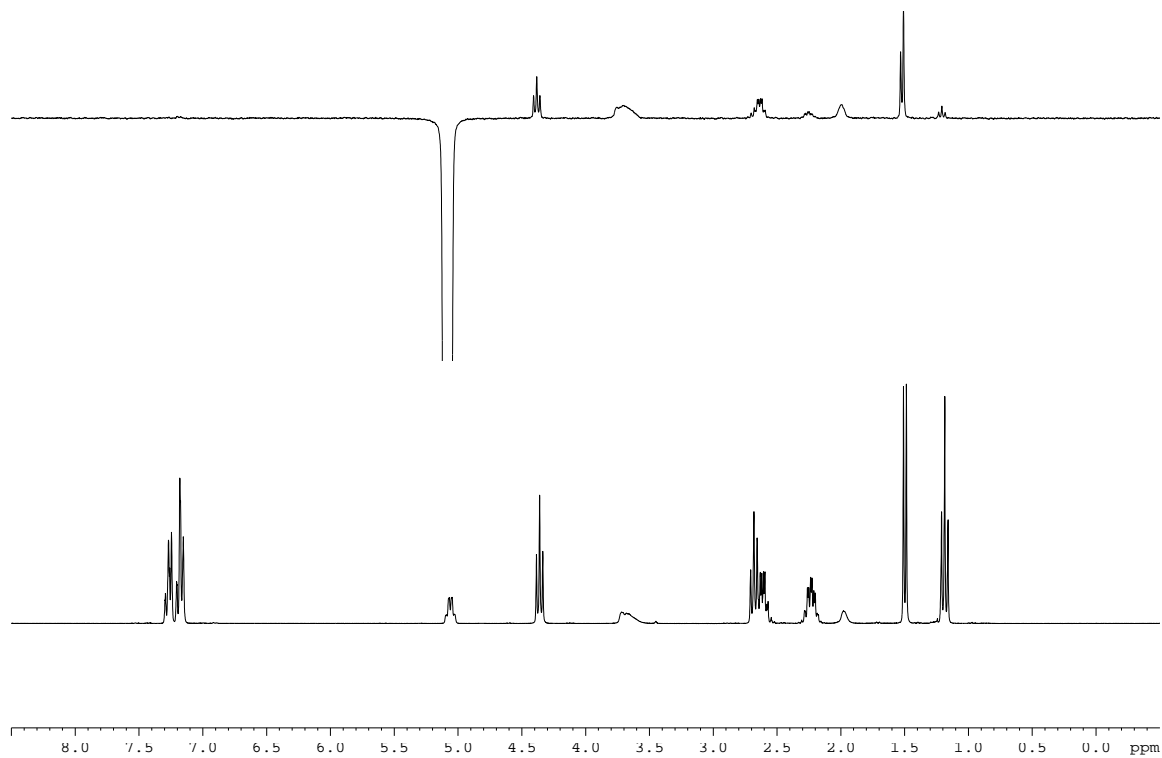

# Compound 13f

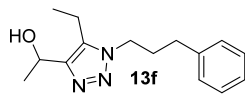

## <sup>1</sup>H NMR (300 MHz, CDCl<sub>3</sub>)

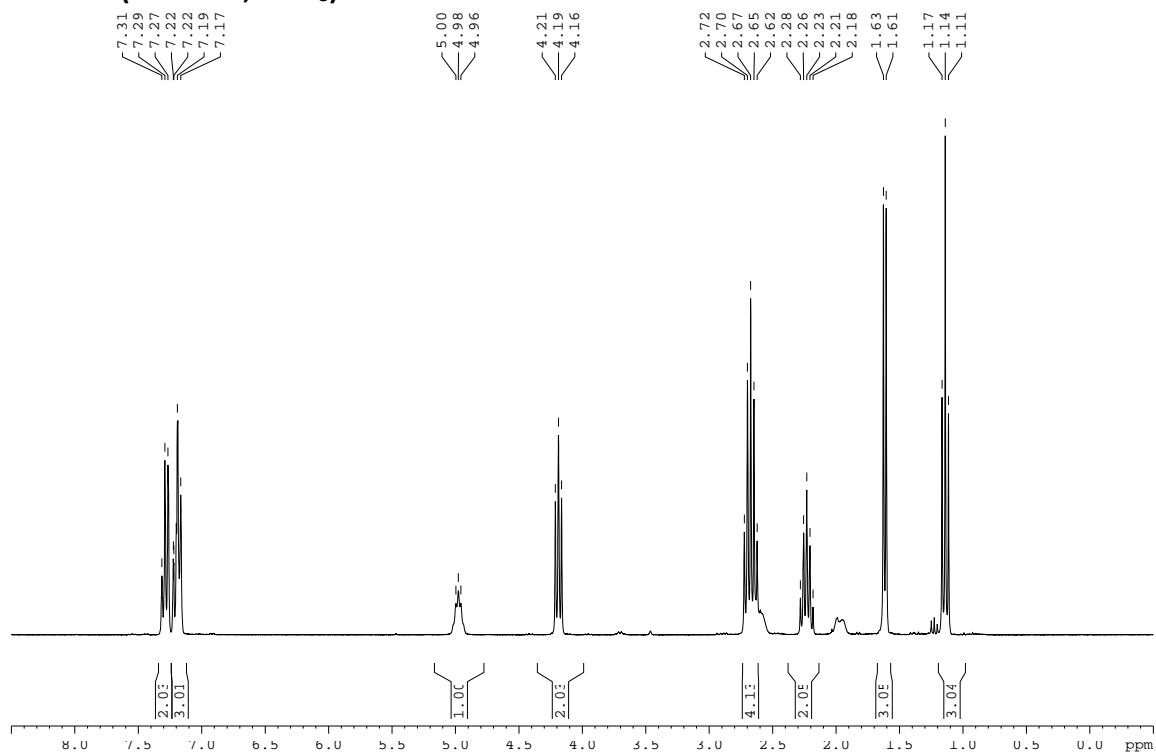

<sup>13</sup>C NMR (75 MHz, CDCl<sub>3</sub>)

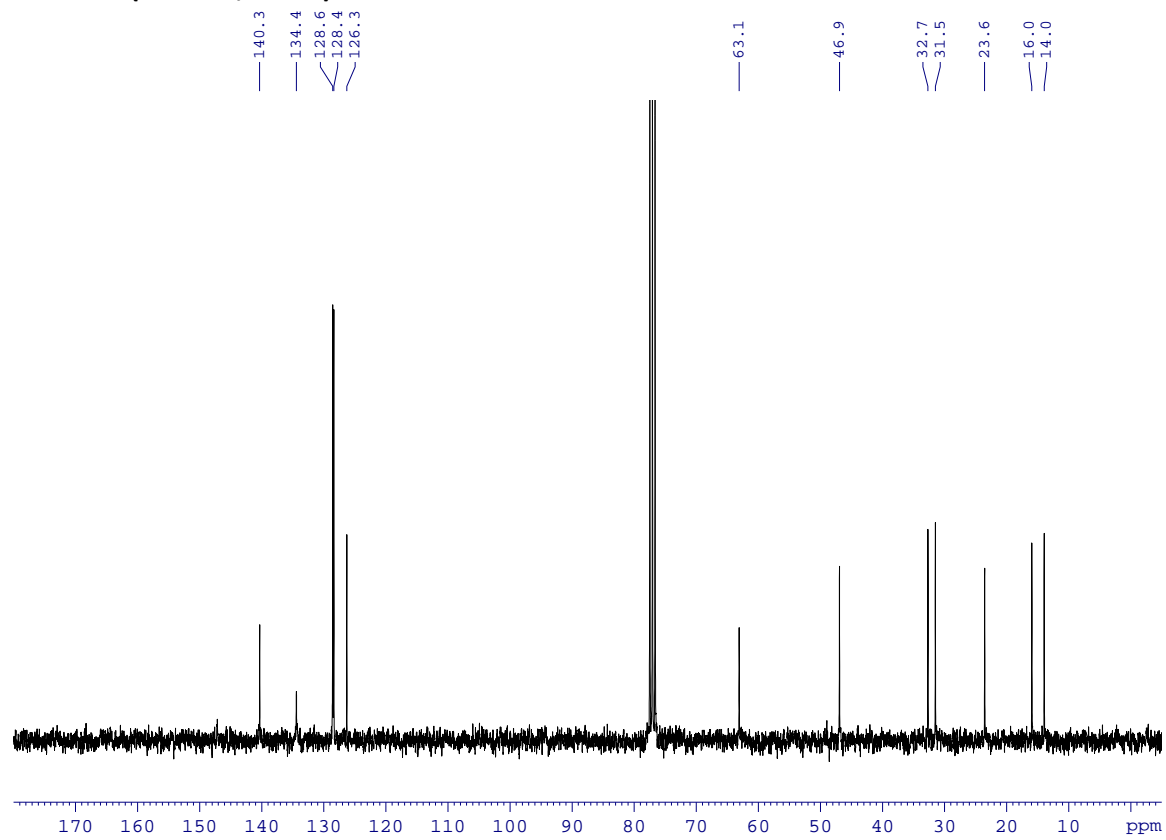

HSQC

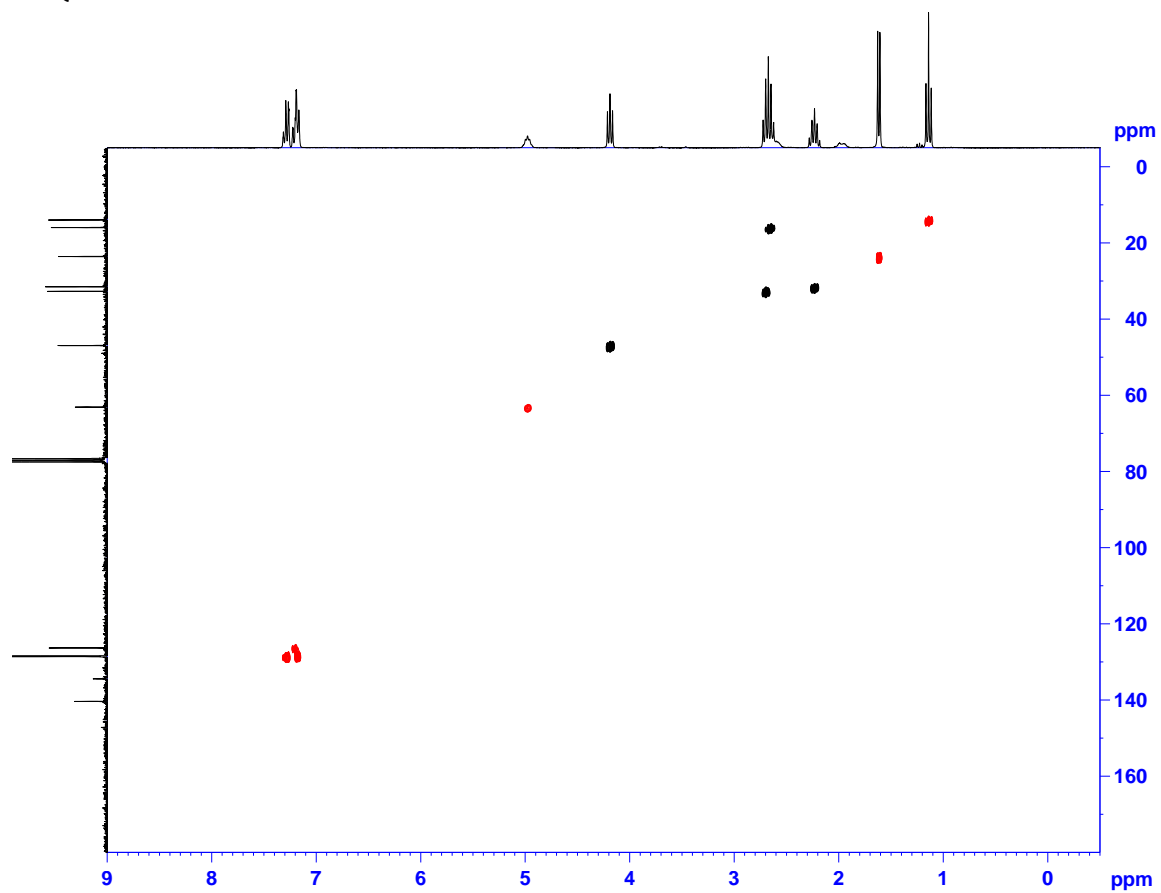



# Compound 15a

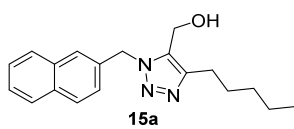

## <sup>1</sup>H NMR (300 MHz, CDCl<sub>3</sub>)

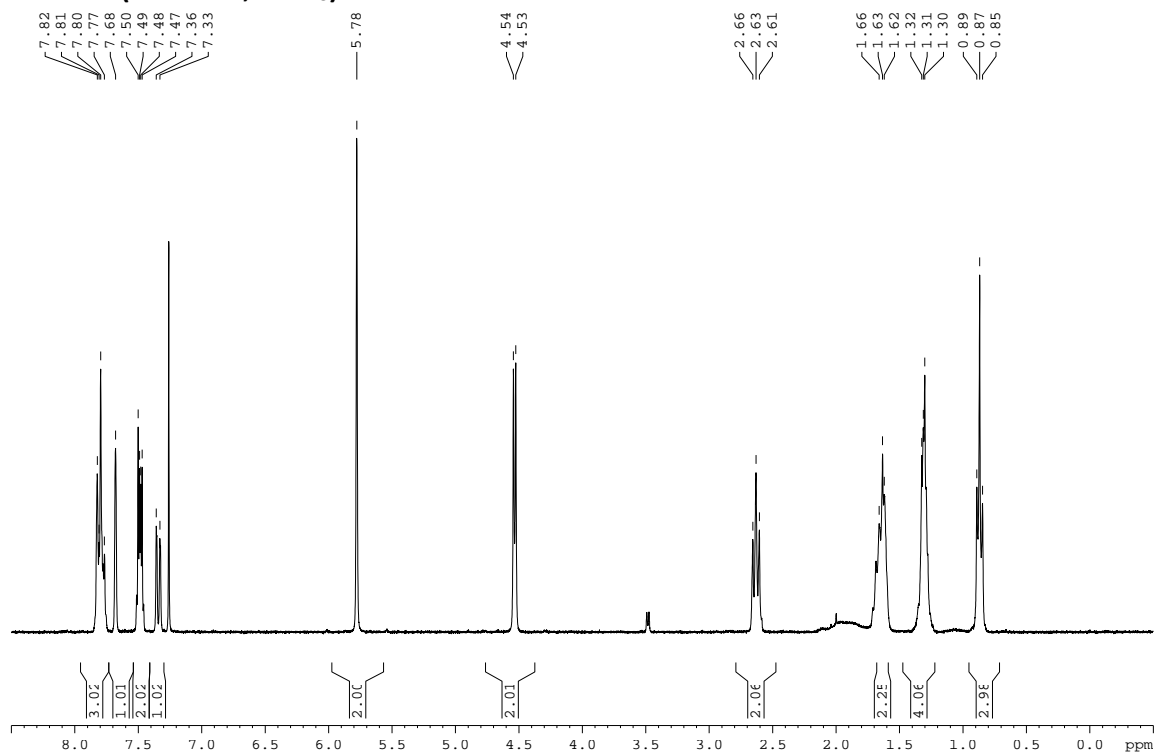

**$^{13}\text{C}$  NMR (75 MHz,  $\text{CDCl}_3$ )**

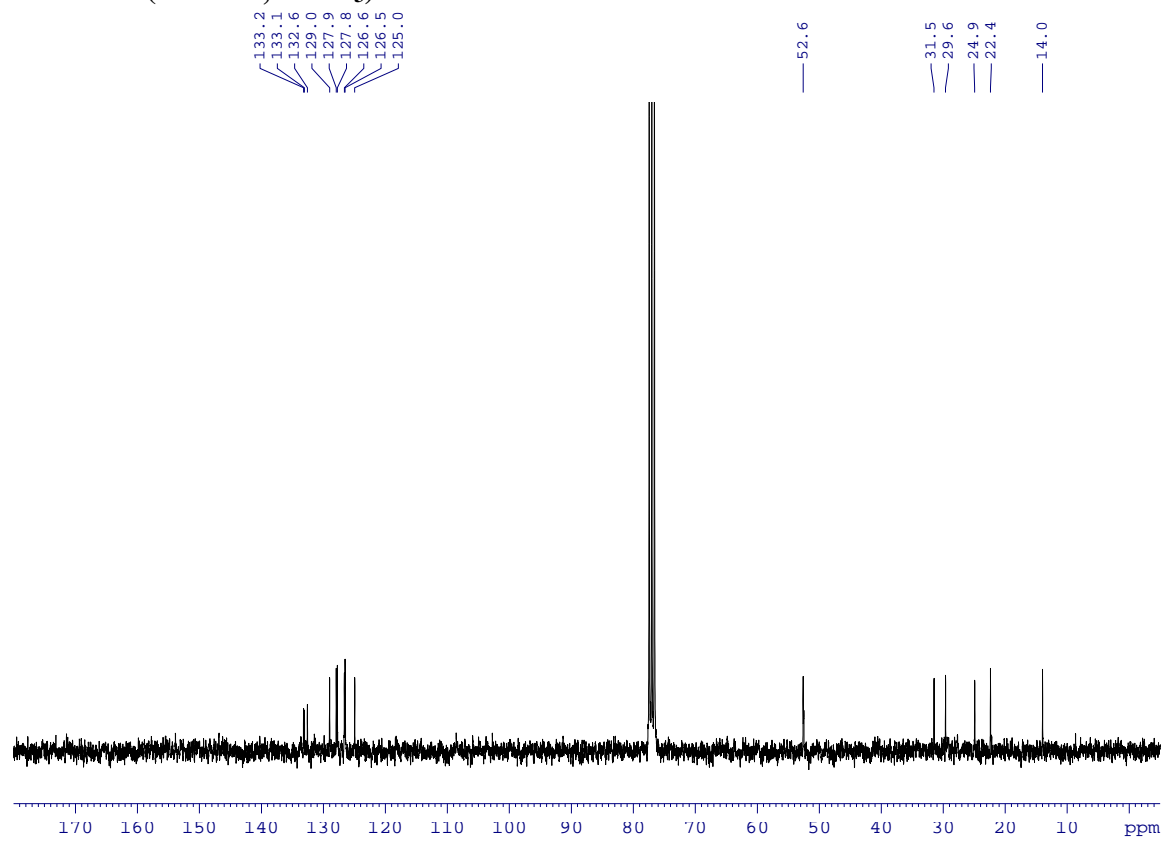

HSQC

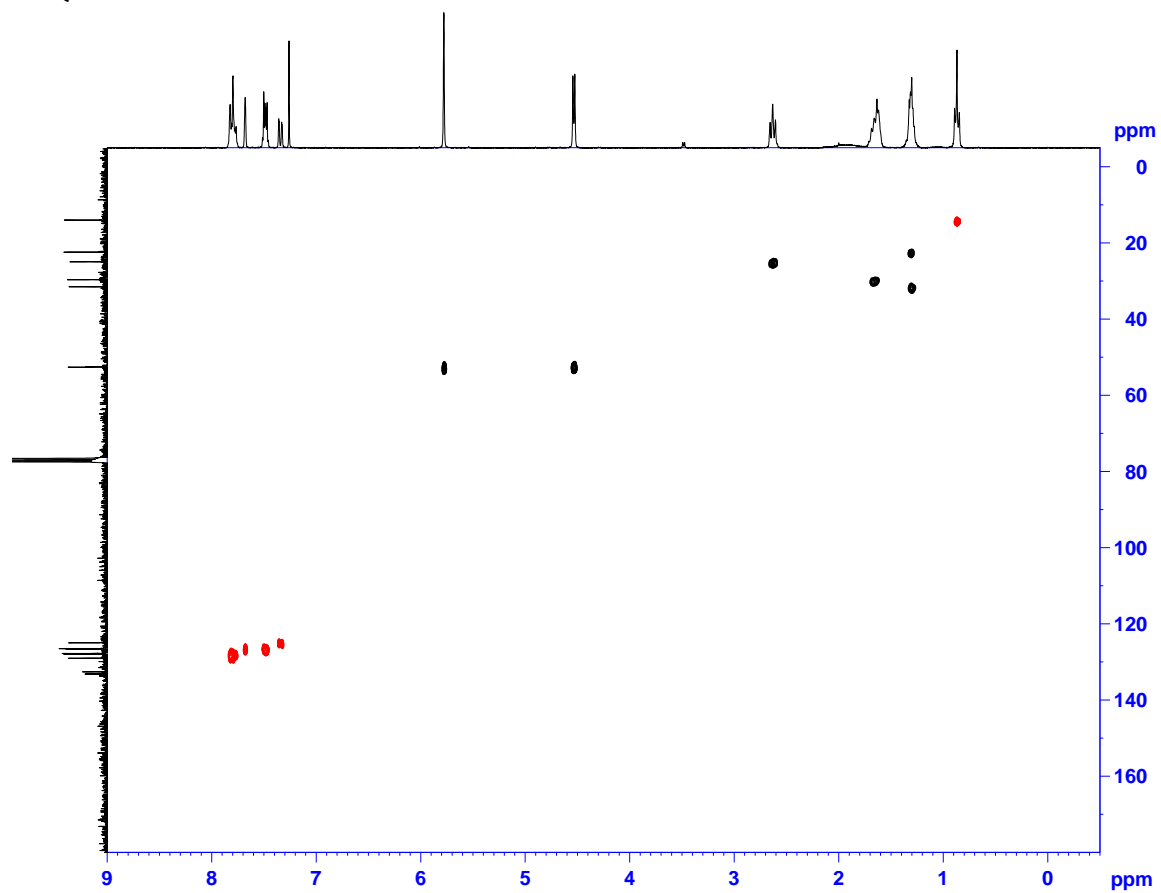

NOE

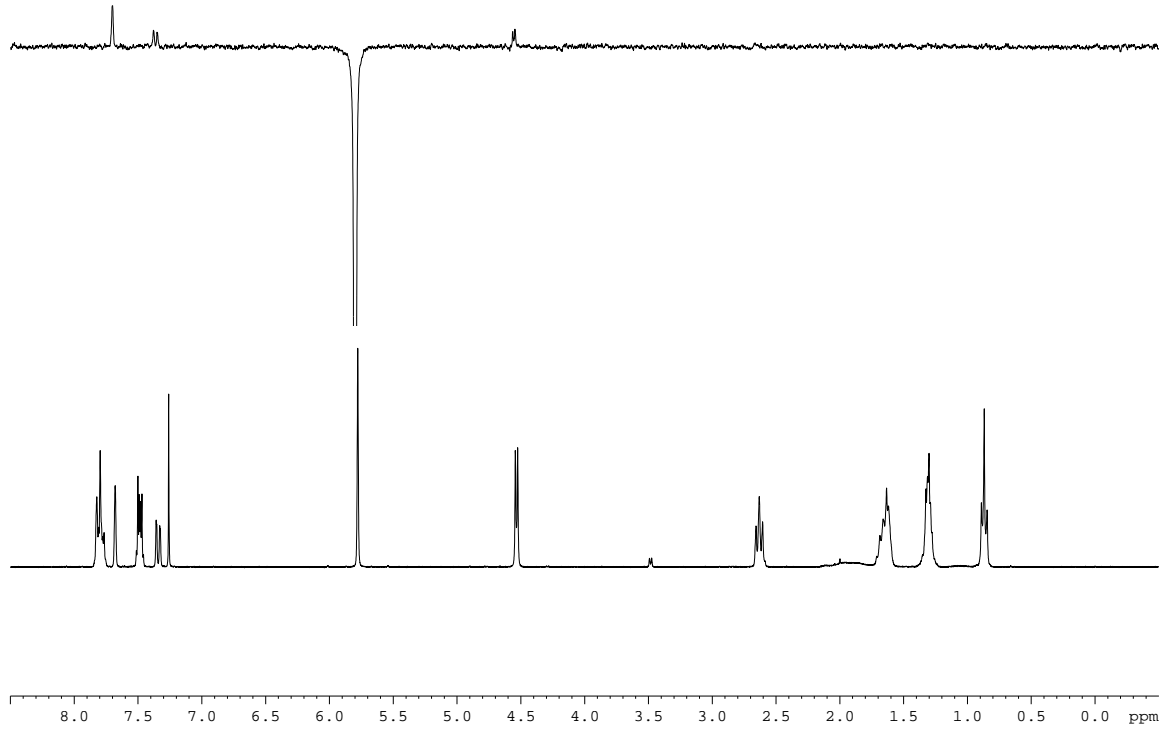

# Compound 15b

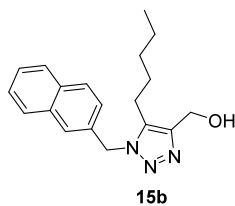

**<sup>1</sup>H NMR (300 MHz, CDCl<sub>3</sub>)**

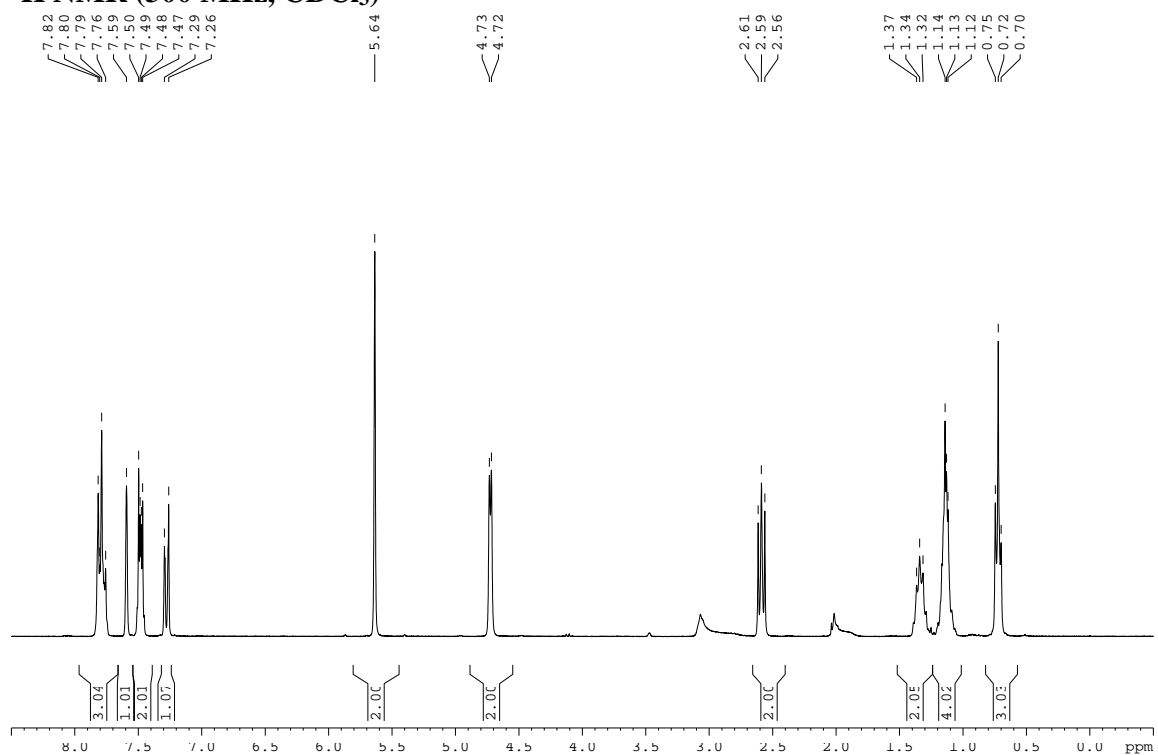

**<sup>13</sup>C NMR (75 MHz, CDCl<sub>3</sub>)**

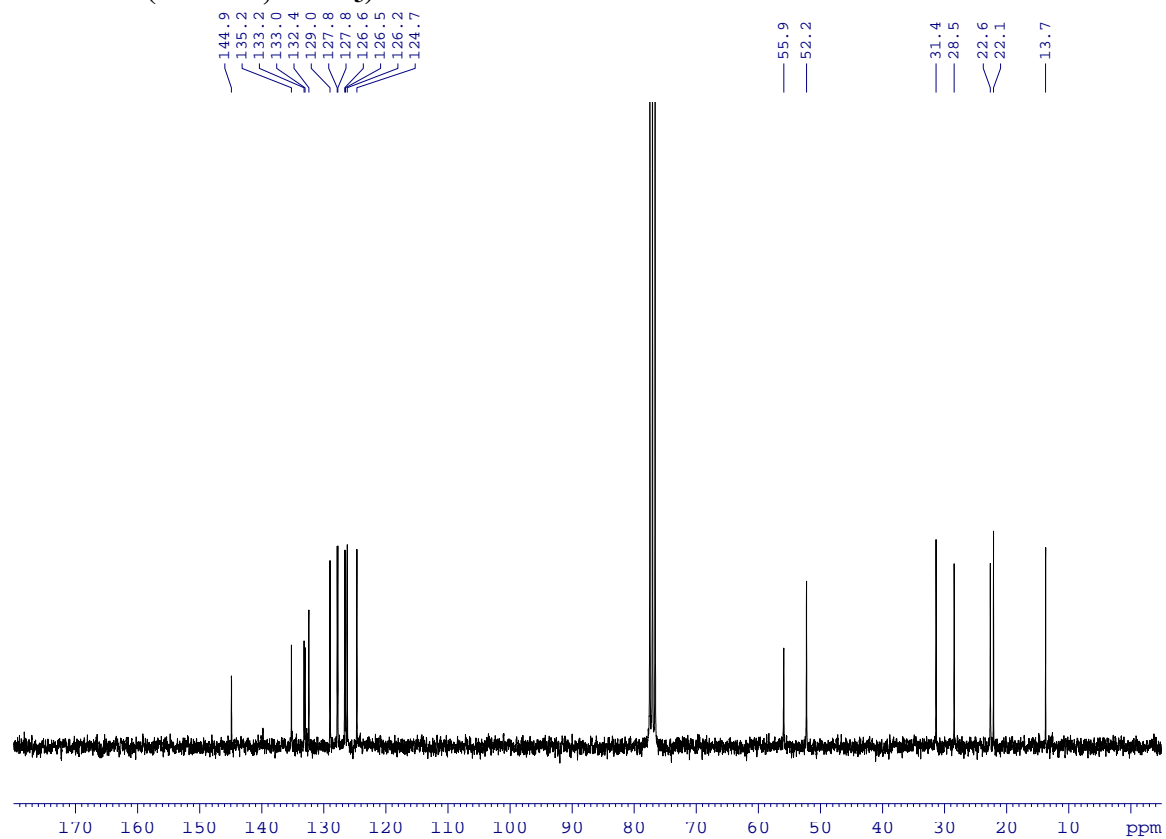

HSQC

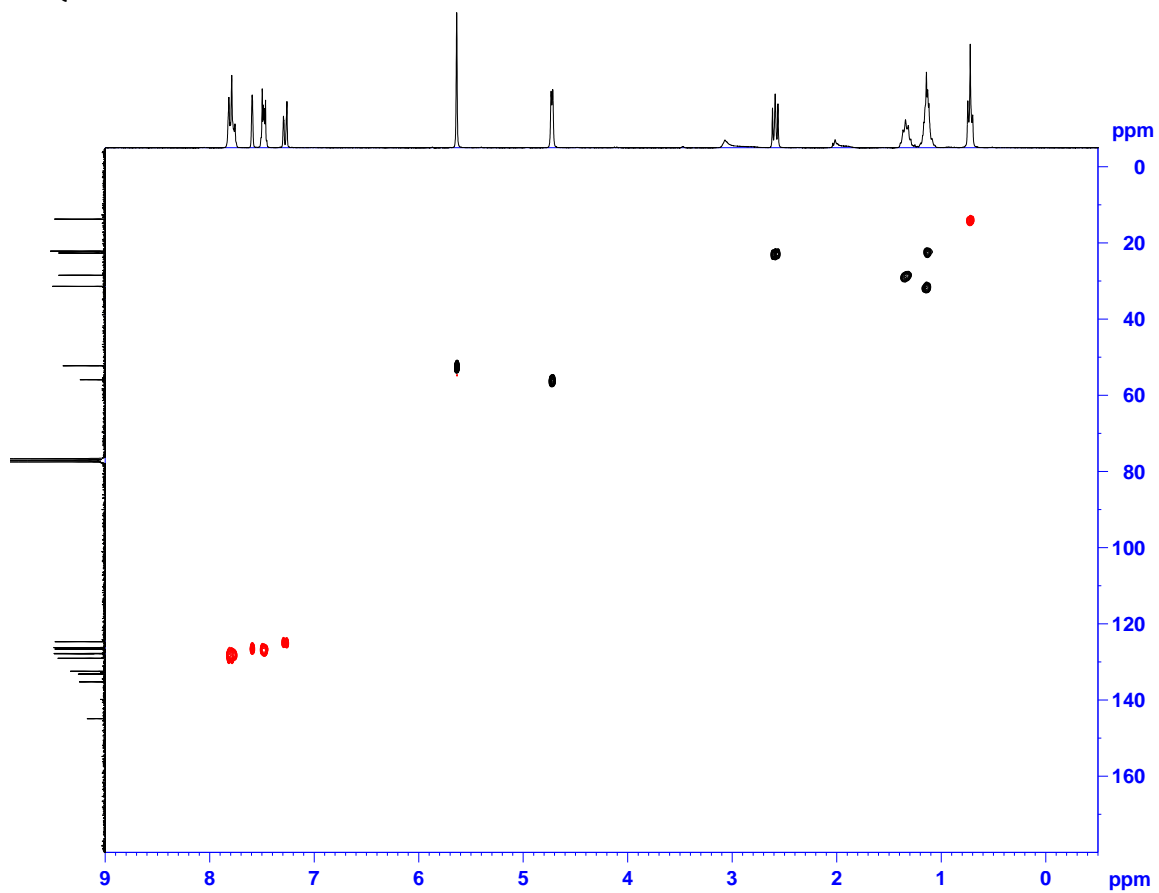

# Compound 15c

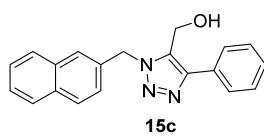

## <sup>1</sup>H NMR (300 MHz, CDCl<sub>3</sub>)

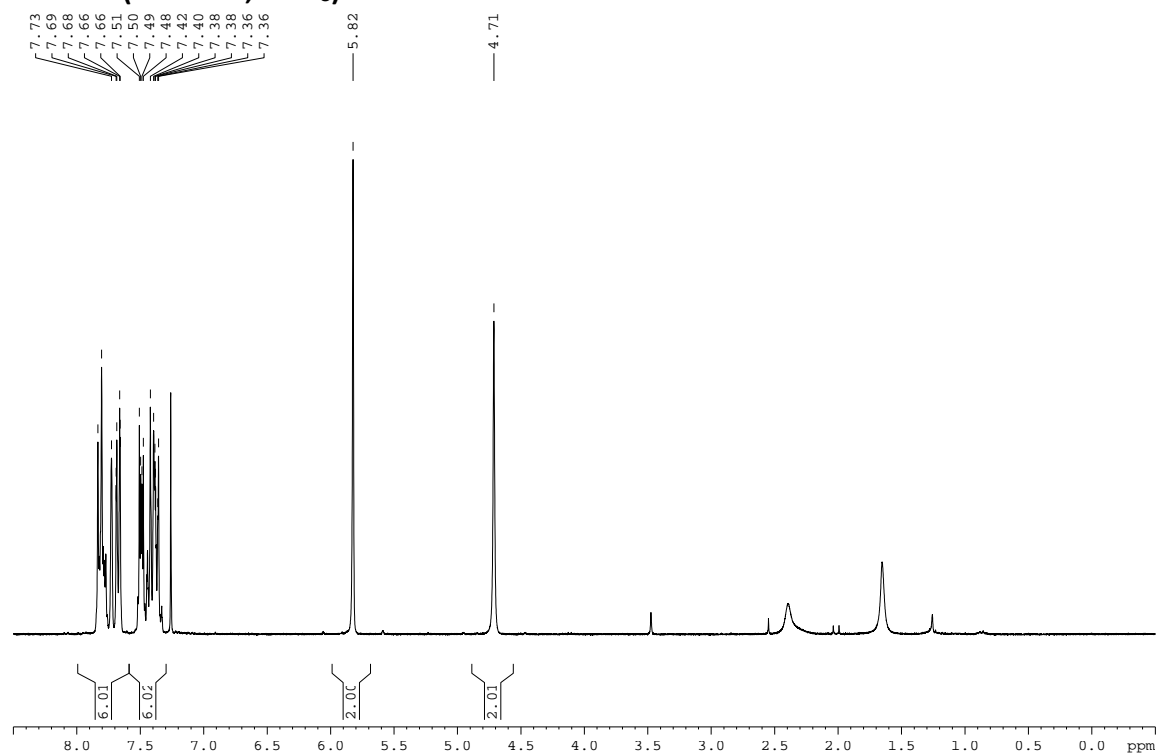



**$^{13}\text{C}$  NMR (75 MHz,  $\text{CDCl}_3$ )**

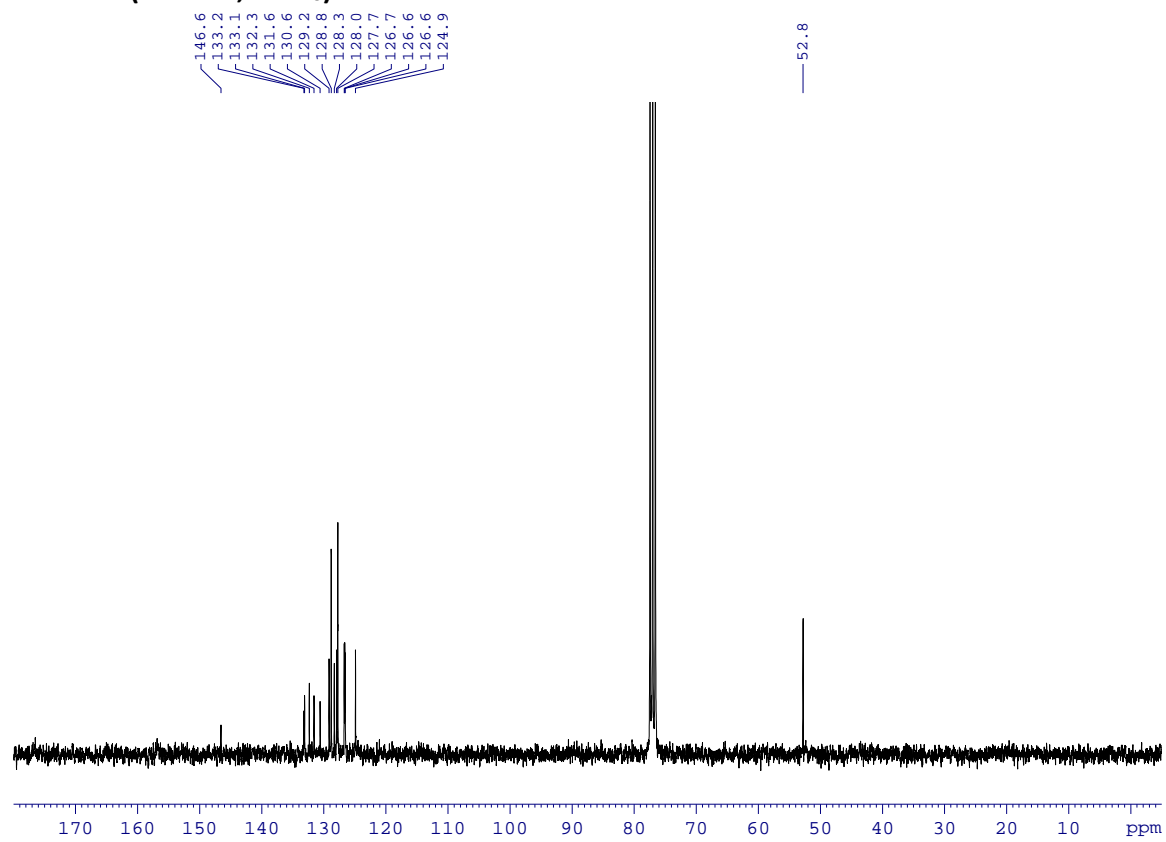

HSQC

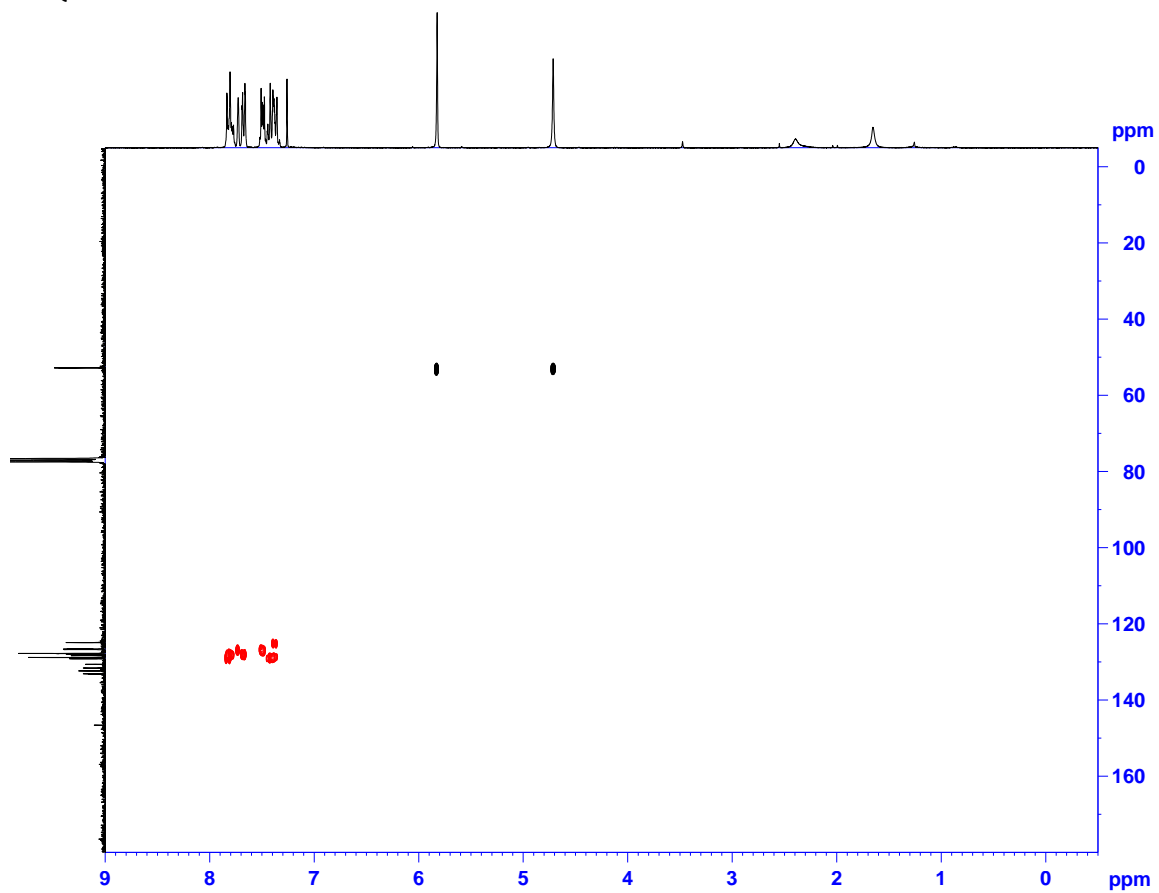

NOE

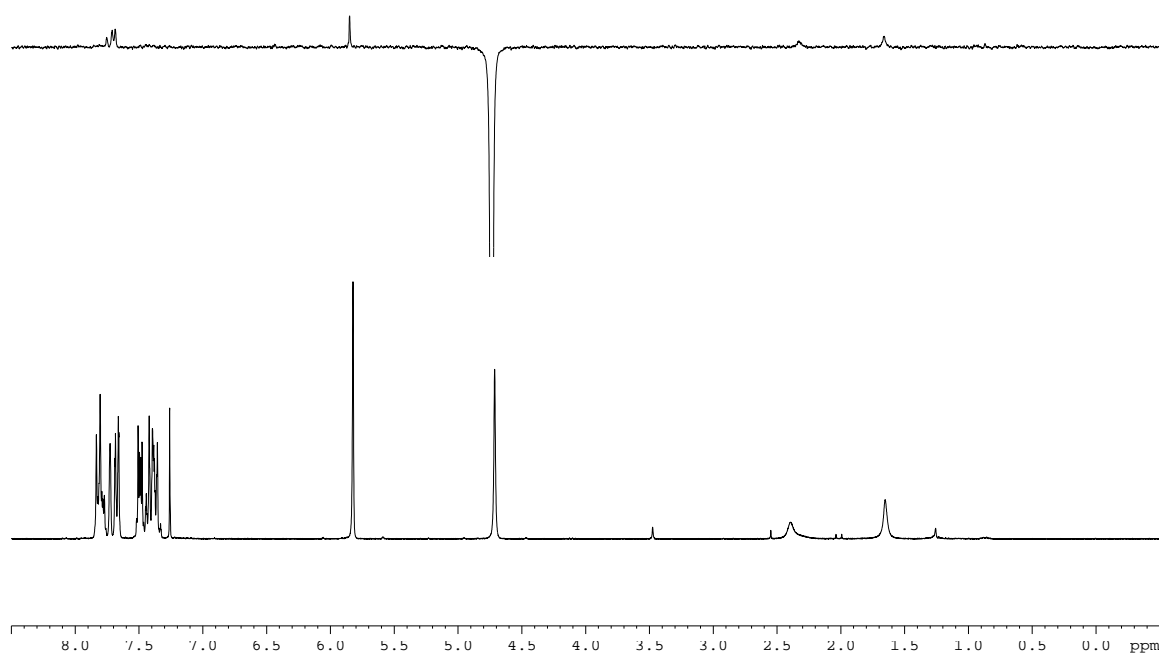

# Compound 15d

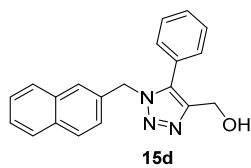

## <sup>1</sup>H NMR (300 MHz, CDCl<sub>3</sub>)

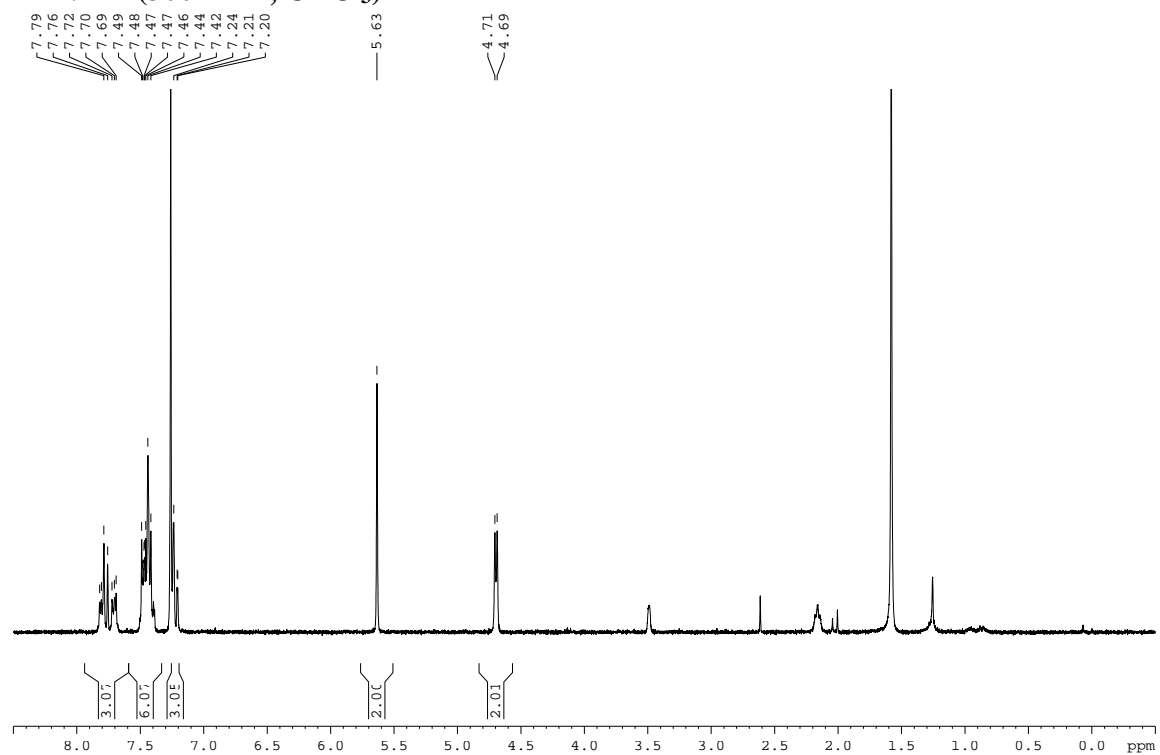

**$^{13}\text{C}$  NMR (75 MHz,  $\text{CDCl}_3$ )**

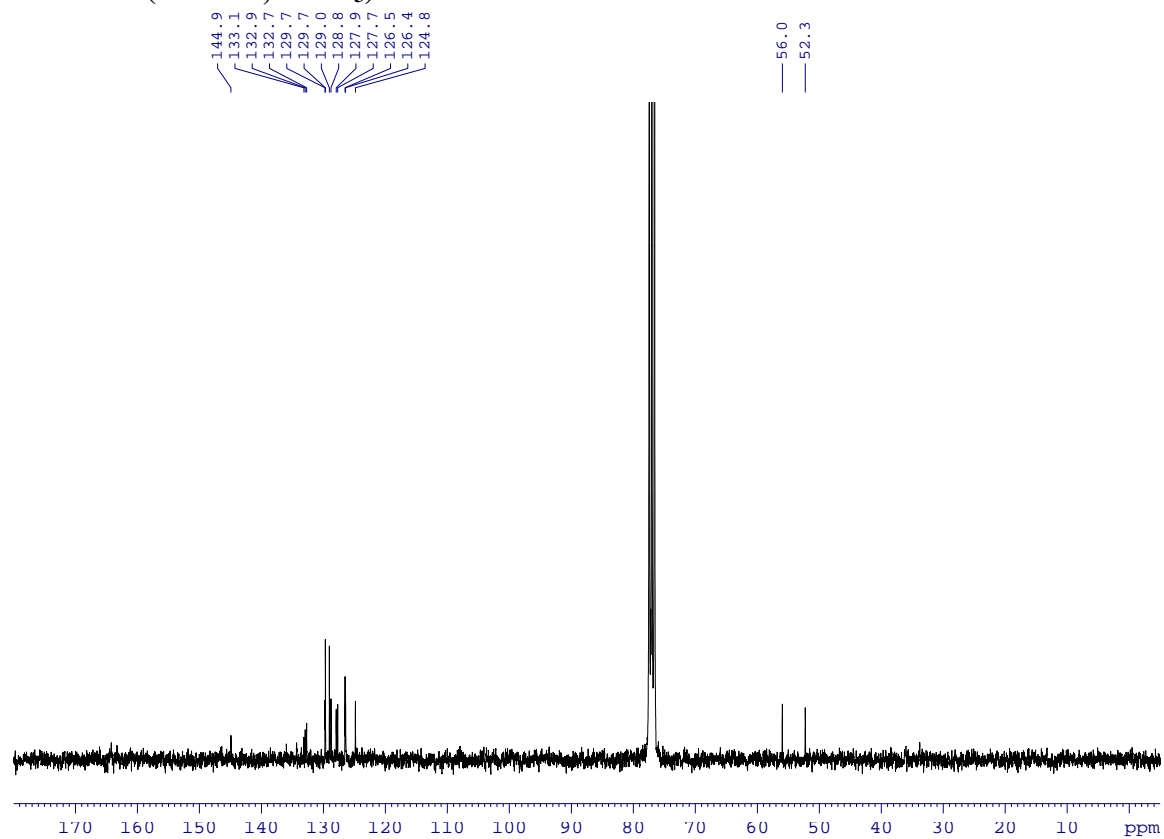

# HSQC

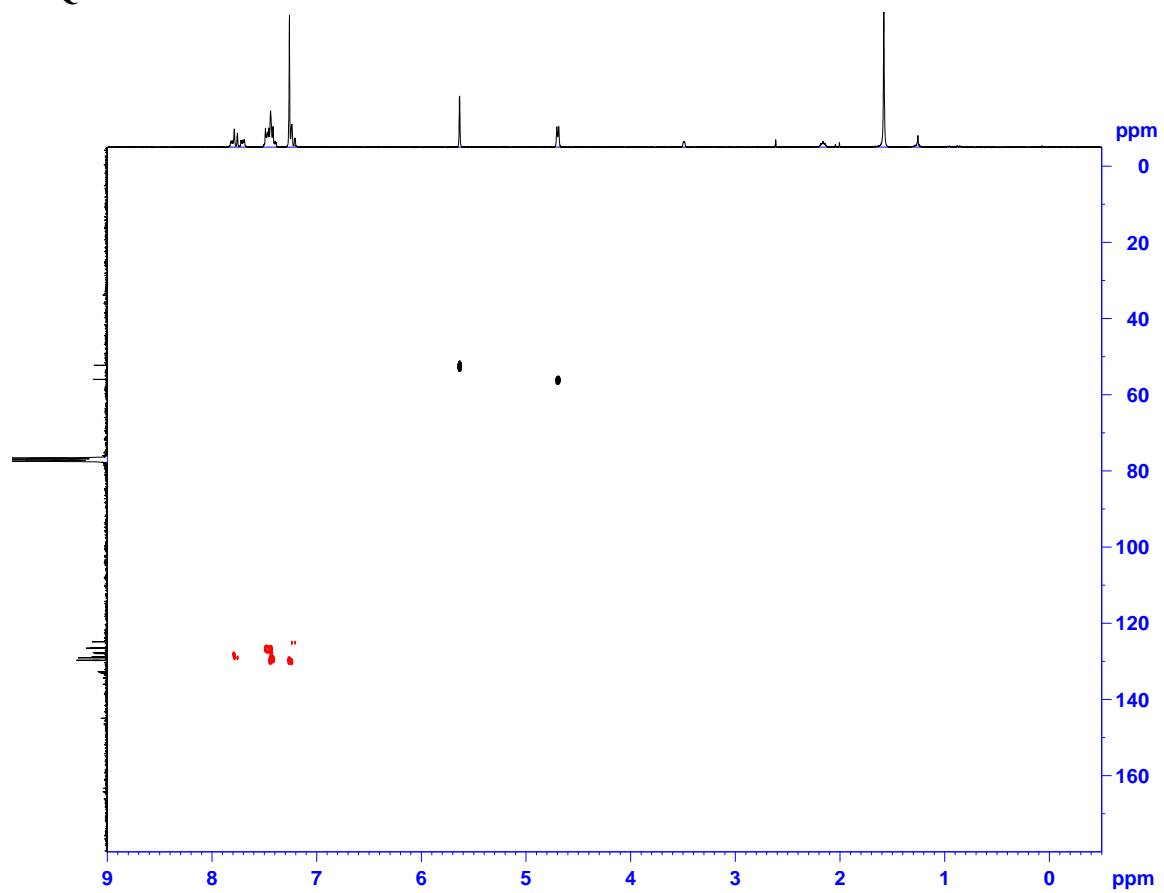

# Compound 15e

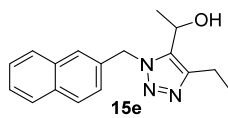

## <sup>1</sup>H NMR (300 MHz, CDCl<sub>3</sub>)

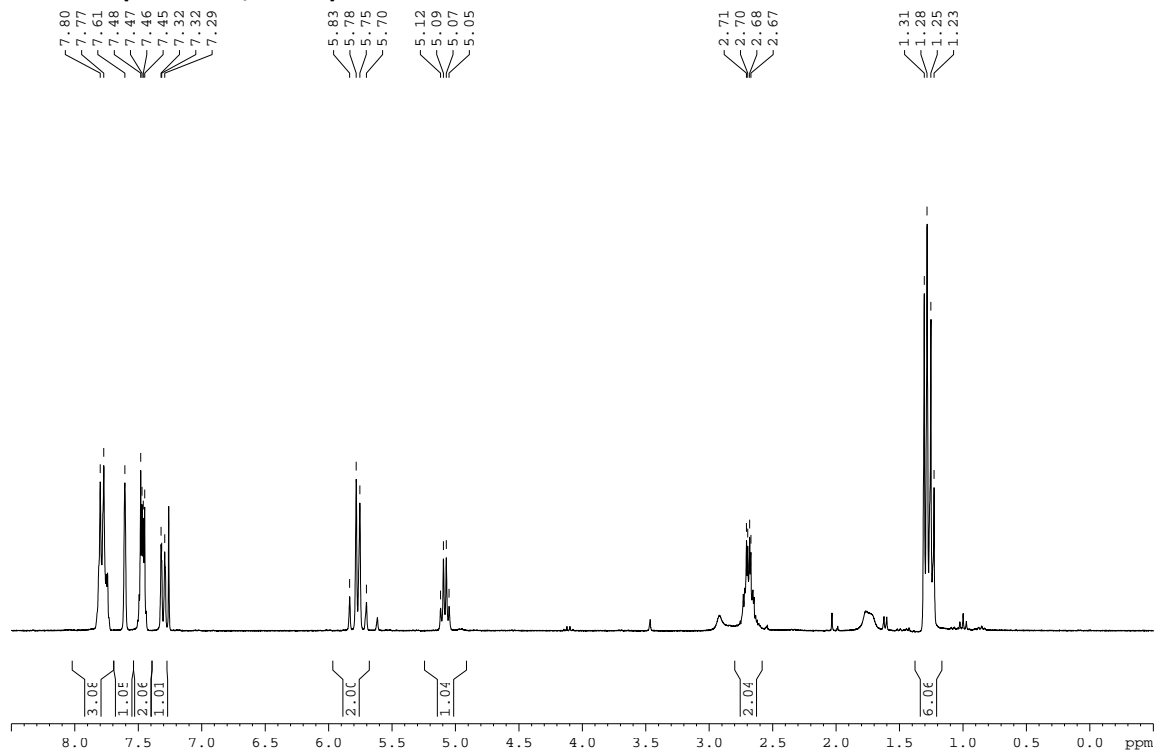

**$^{13}\text{C}$  NMR (75 MHz,  $\text{CDCl}_3$ )**

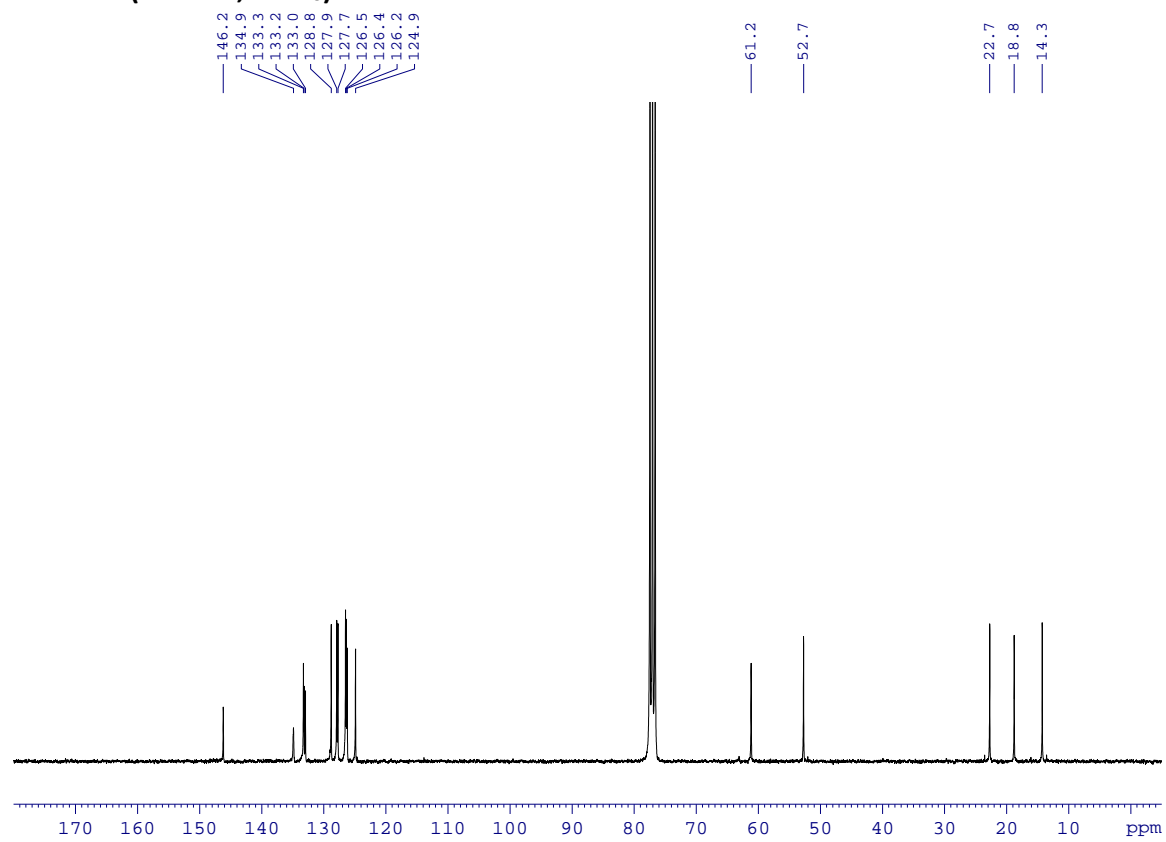

# HSQC

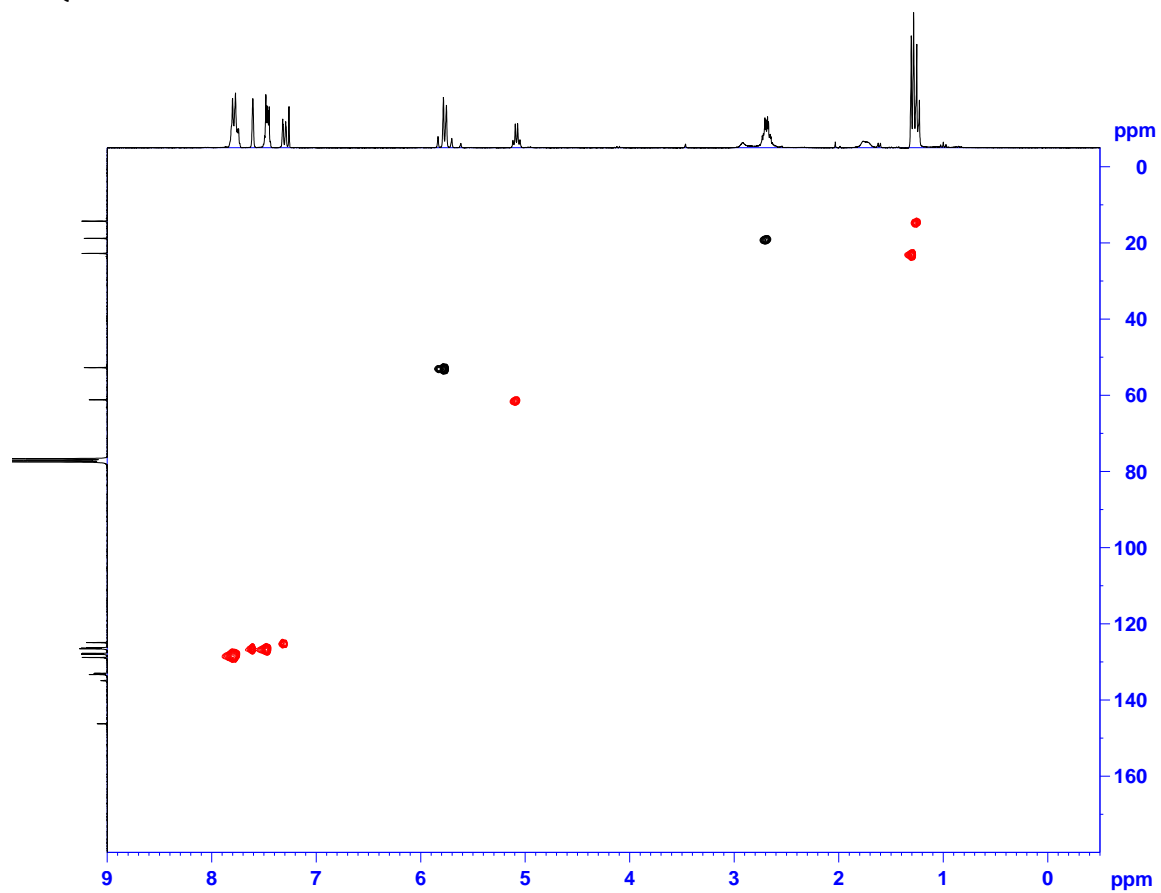



# Compound 15f

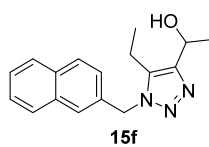

## <sup>1</sup>H NMR (300 MHz, CDCl<sub>3</sub>)

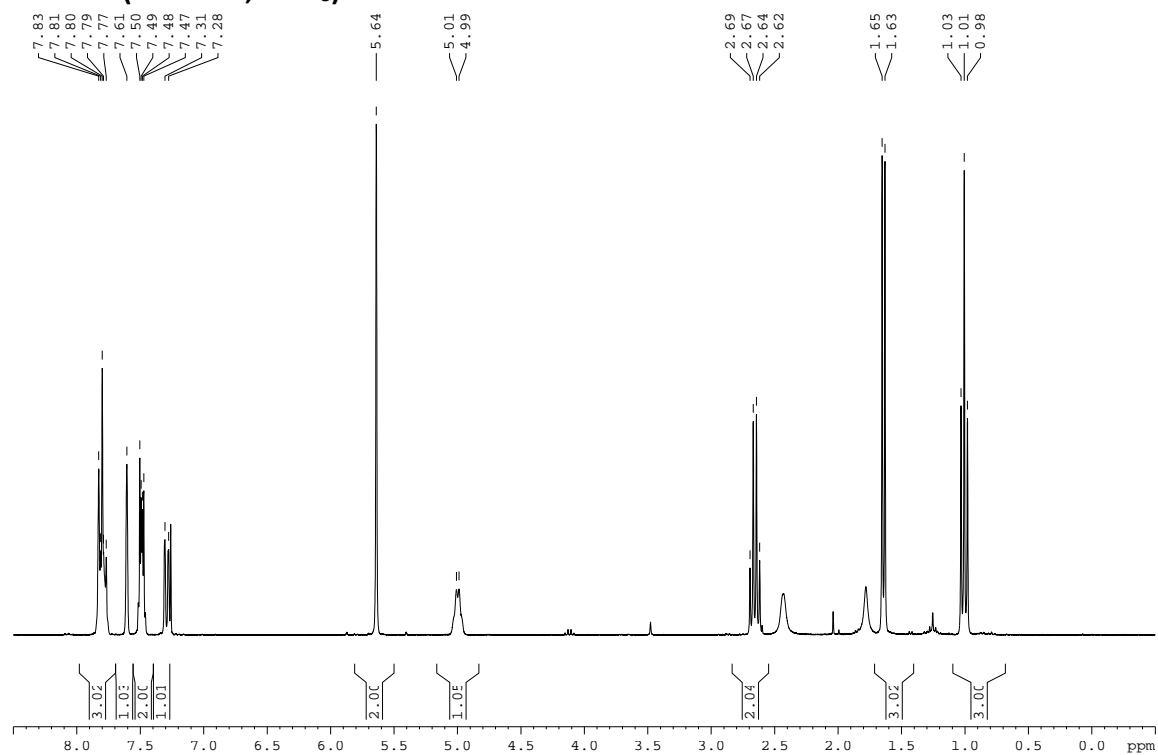

**$^{13}\text{C}$  NMR (75 MHz,  $\text{CDCl}_3$ )**

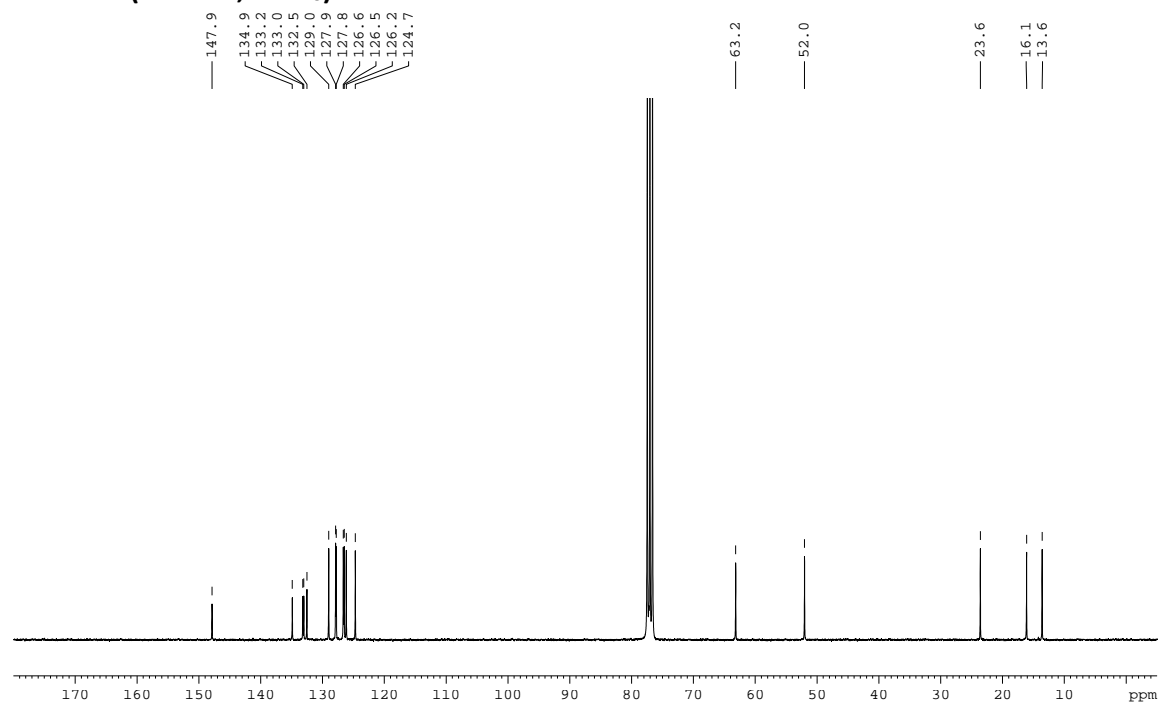

### HSQC

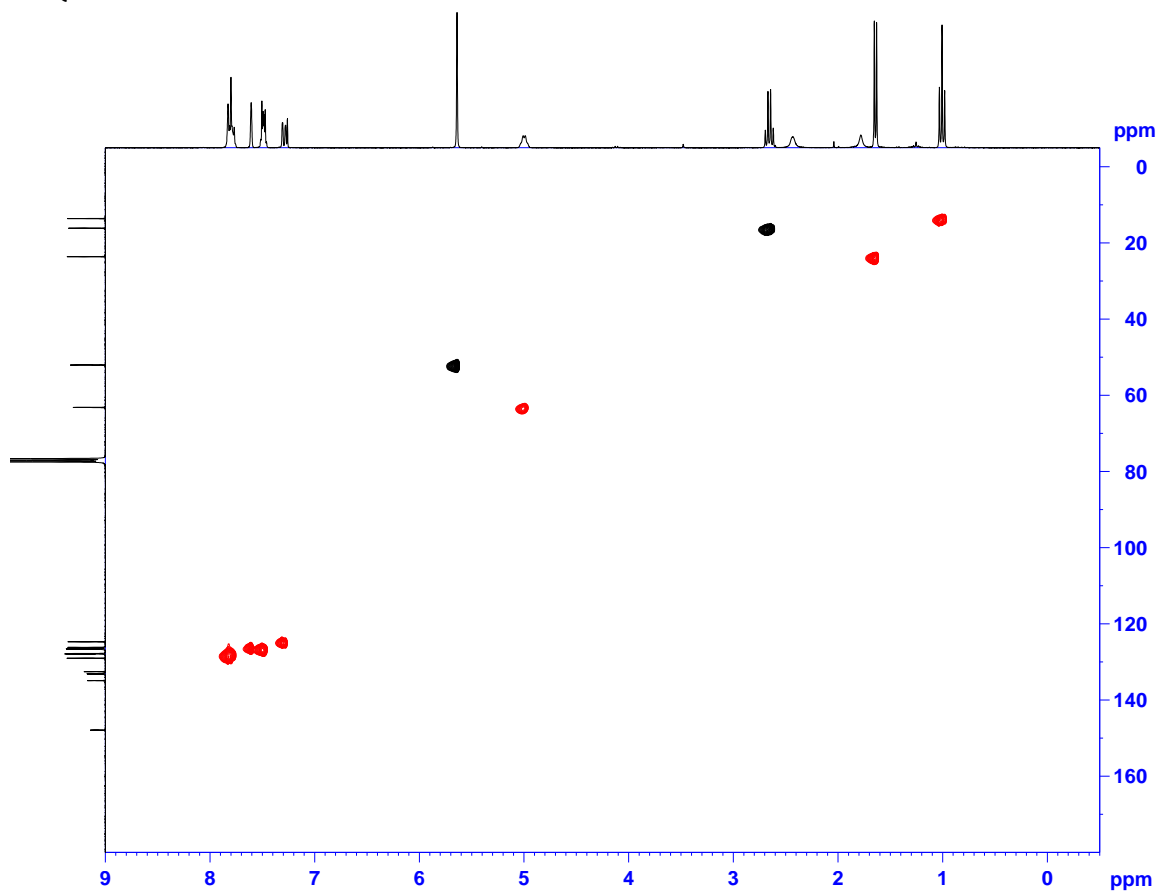

### NOE

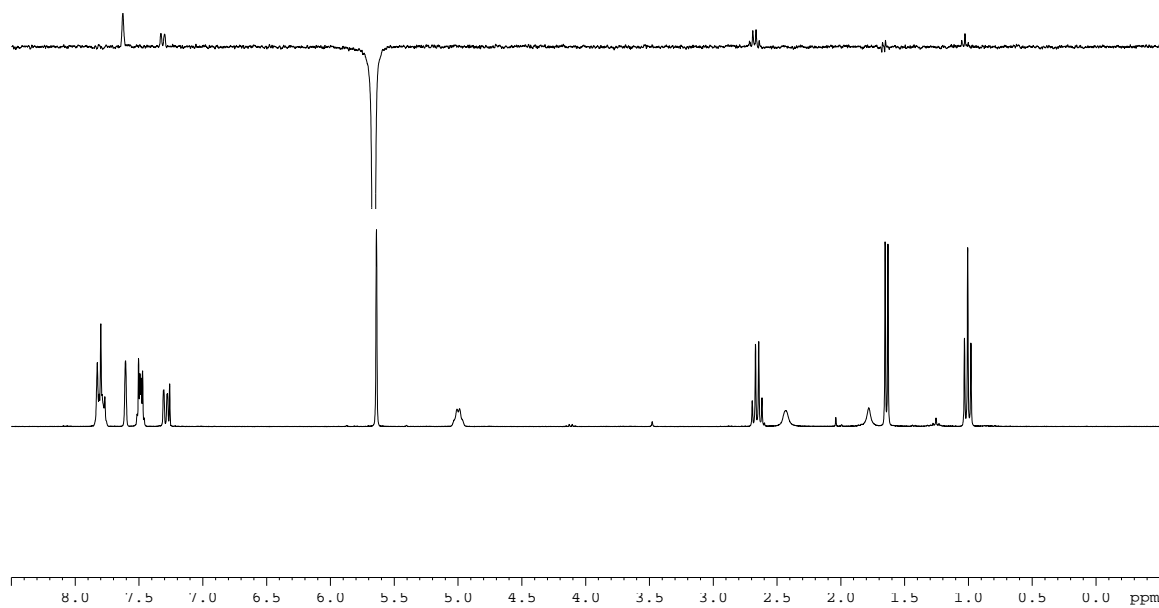

Supplement: d0md00291g1.pdf [file d0md00291g1.pdf]
